# Supplementary material
Source: bioRxiv or medRxiv preprint supplement (https://www.biorxiv.org/highwire/filestream/6969/field_highwire_adjunct_files/1/026153-2.pdf)

**Nilotinib:T84**

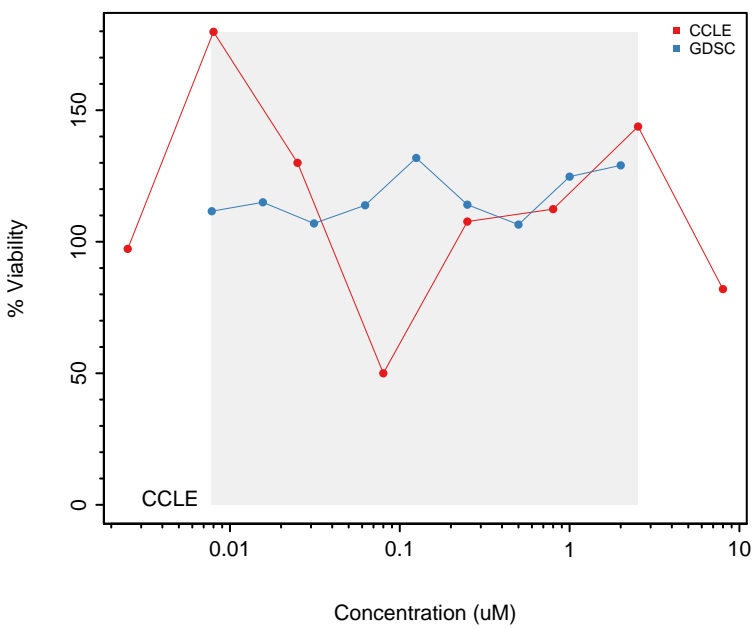

**17-AAG:KNS-62**

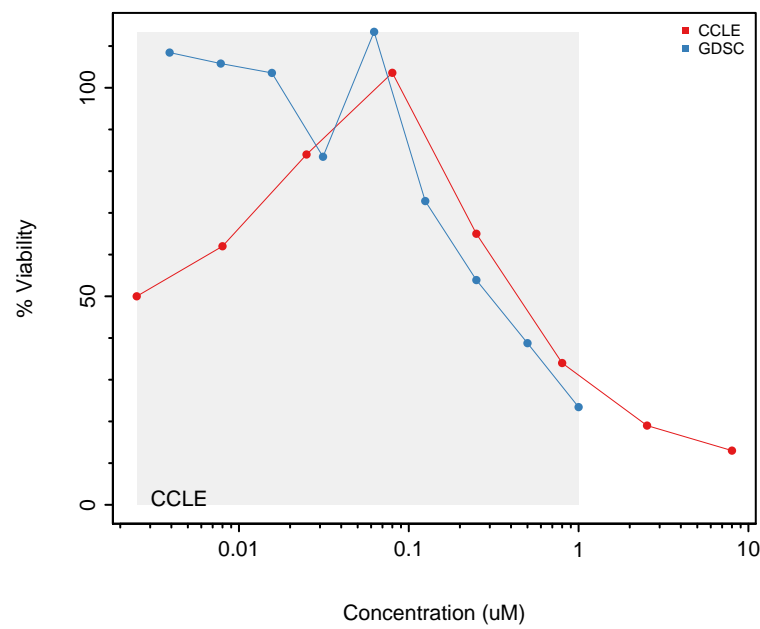

**PHA-665752:TE-11**

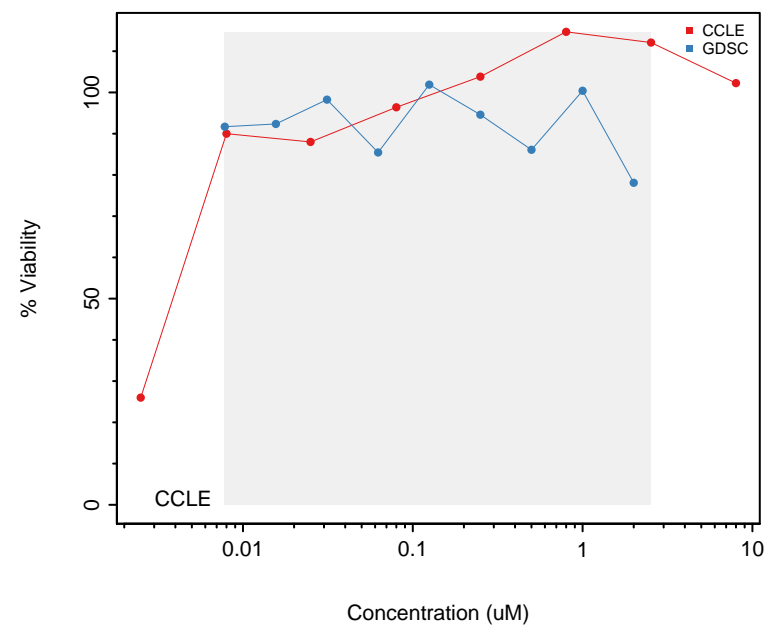

**Nutlin-3:BxPC-3**

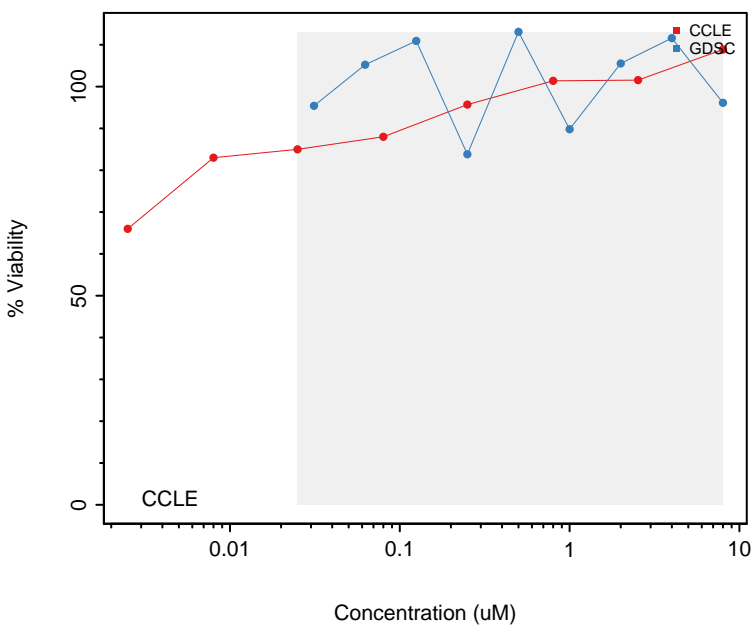

**Nutlin-3:KURAMOCHI**

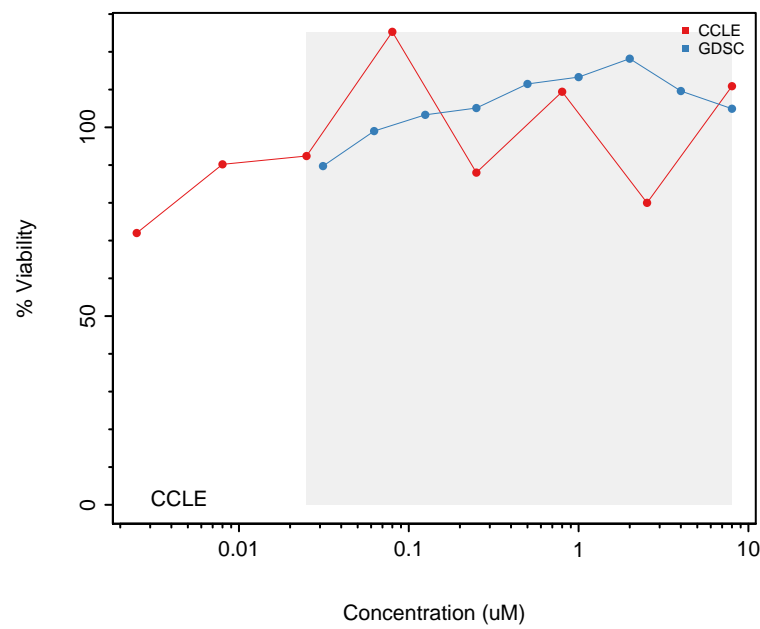

**Nutlin-3:LS-513**

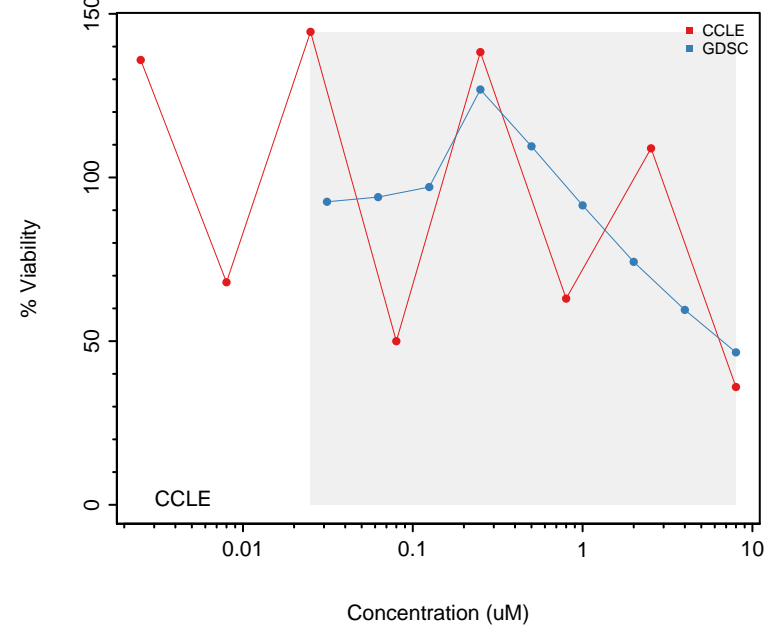

**Nutlin-3:OVCAR-3**

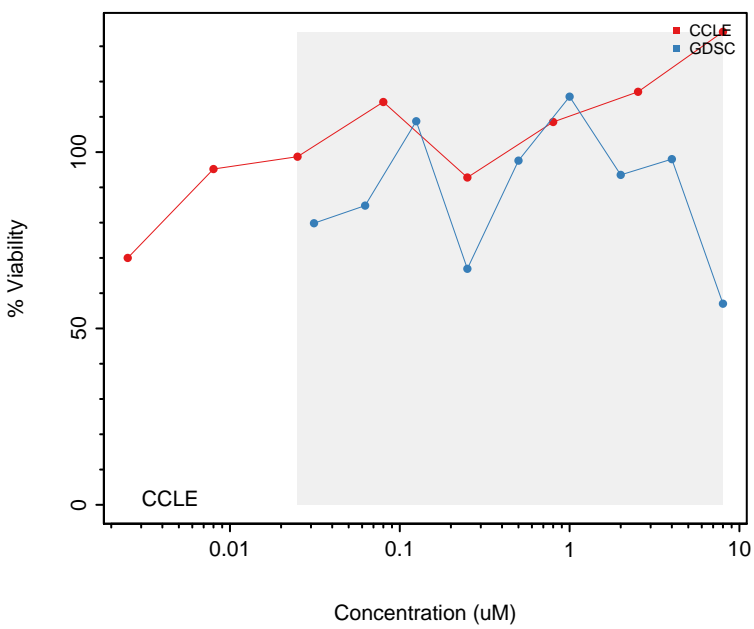

**Nutlin-3:NUGC-3**

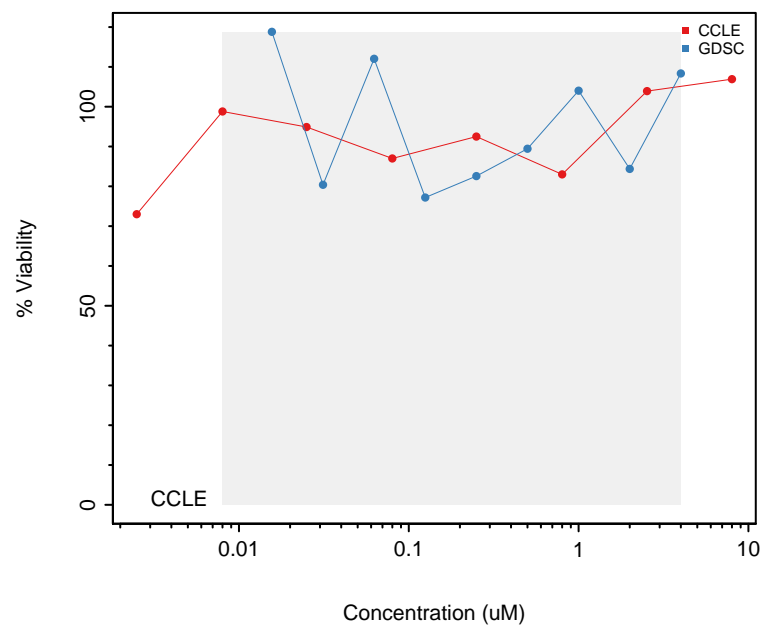

**Nutlin-3:Panc 10.05**

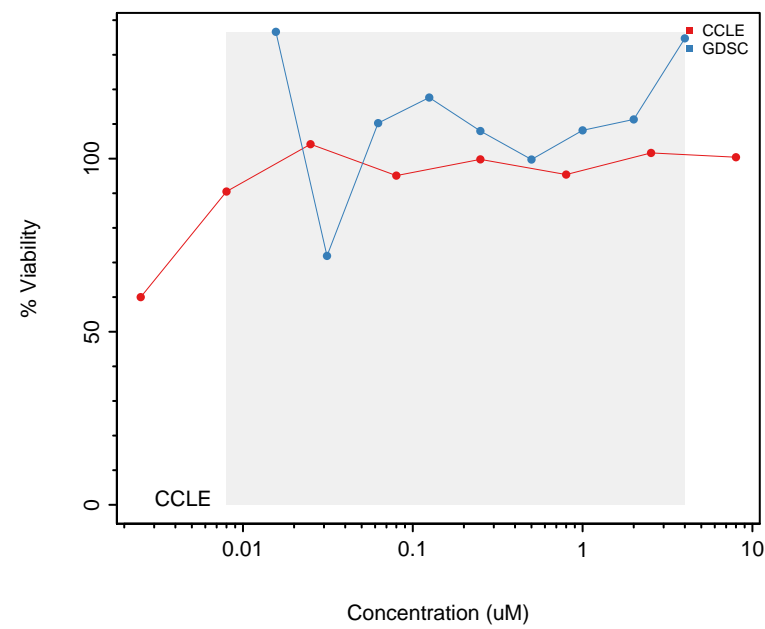

**Nutlin-3:Raji**

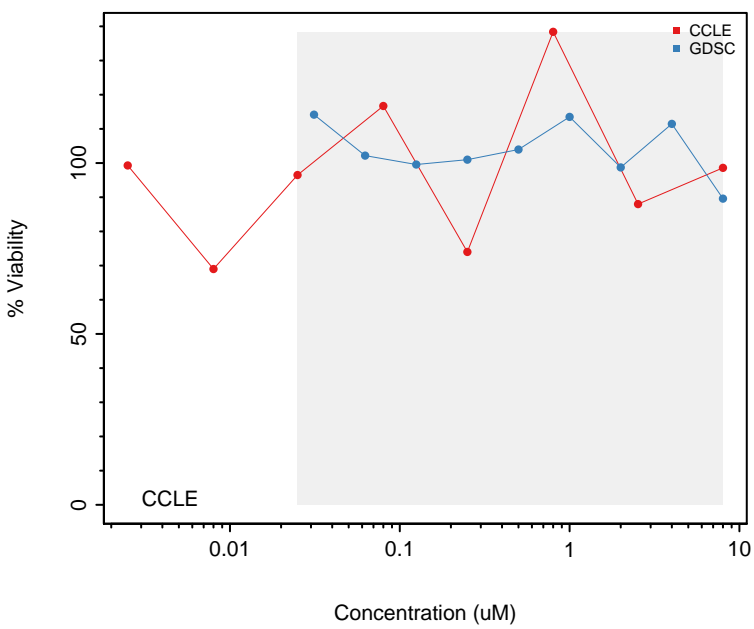

**Nutlin-3:T84**

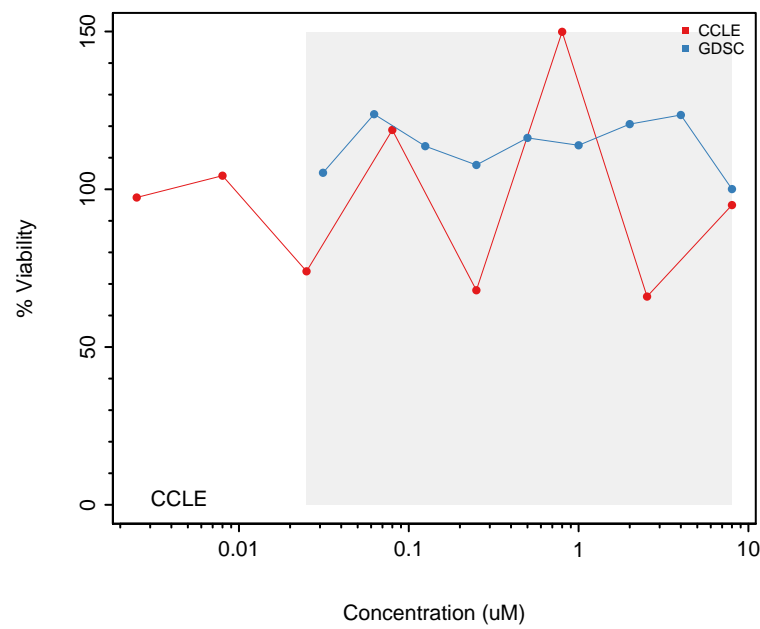

**Nutlin-3:TE-11**

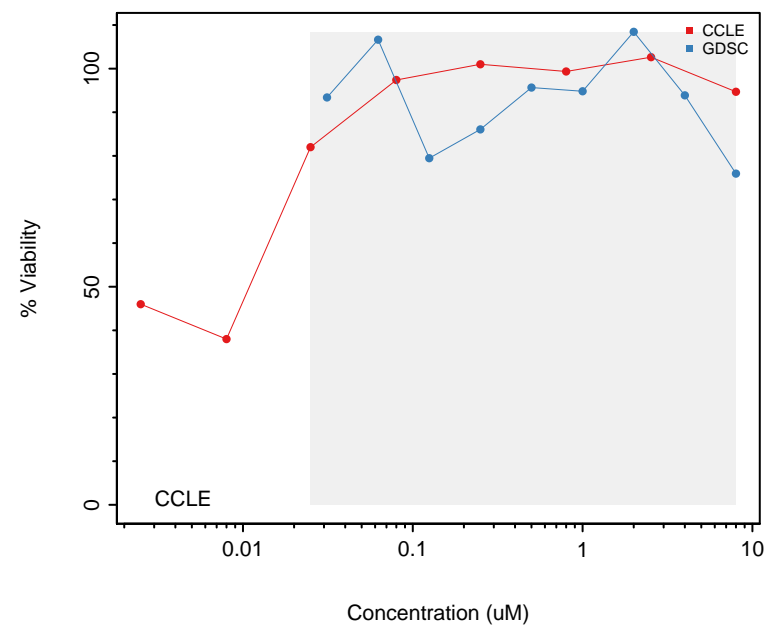

AZD0530:SK-N-FI

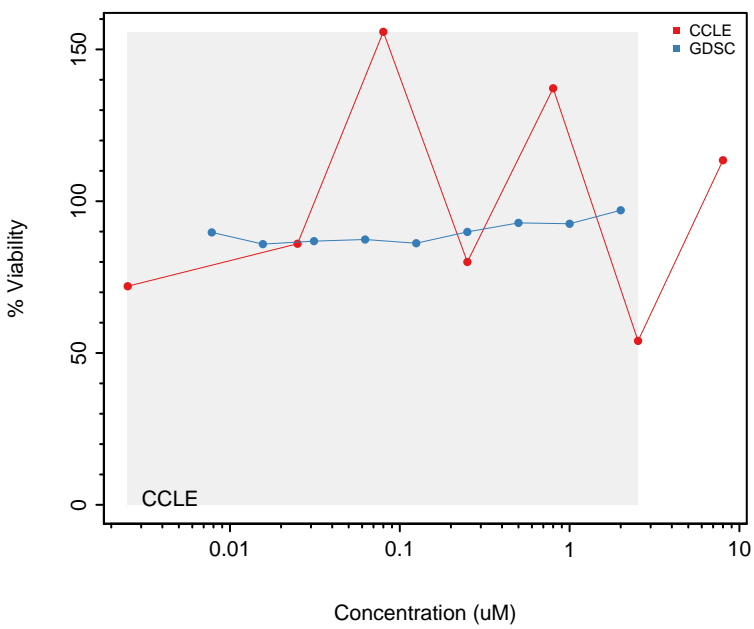

AZD0530:NCI-SNU-16

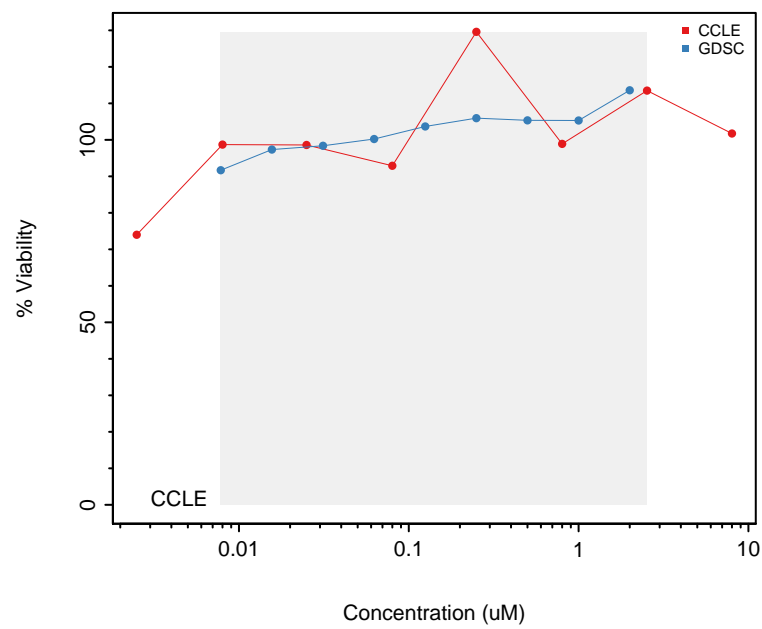

Sorafenib:KNS-42

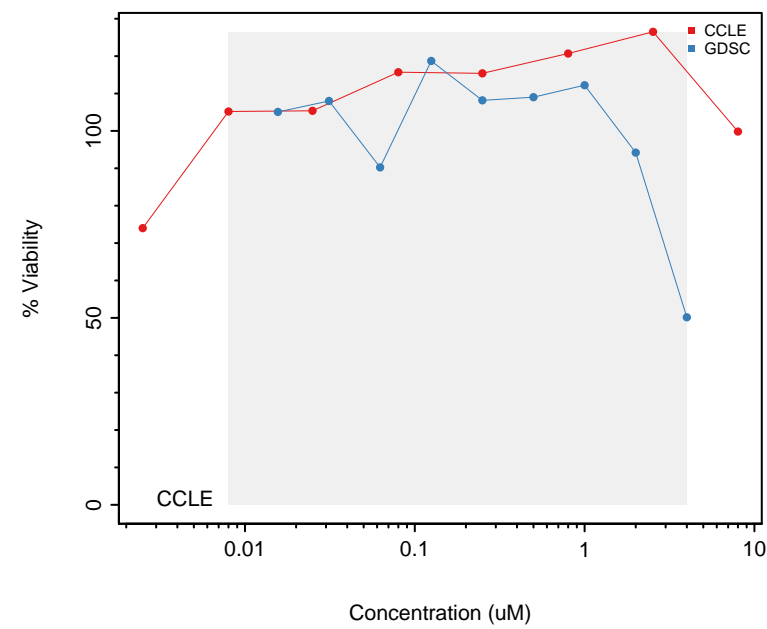

Sorafenib:LS-513

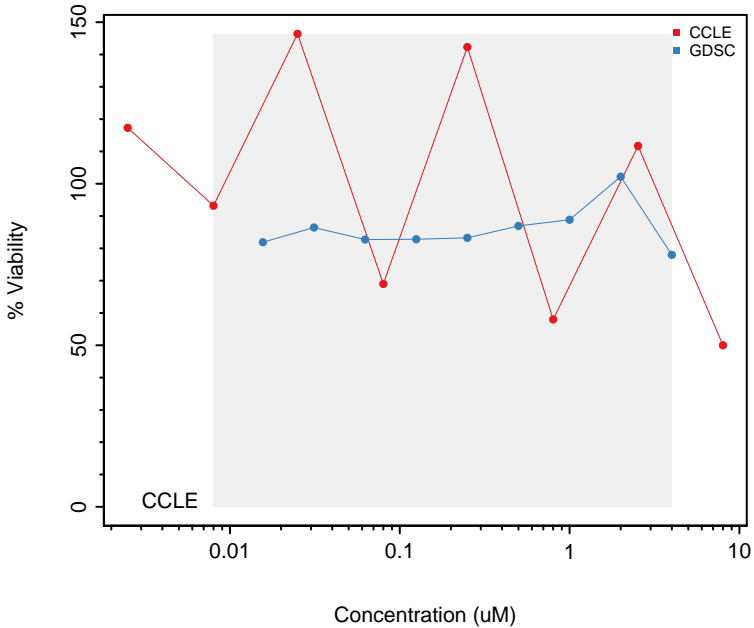

Sorafenib:UACC-257

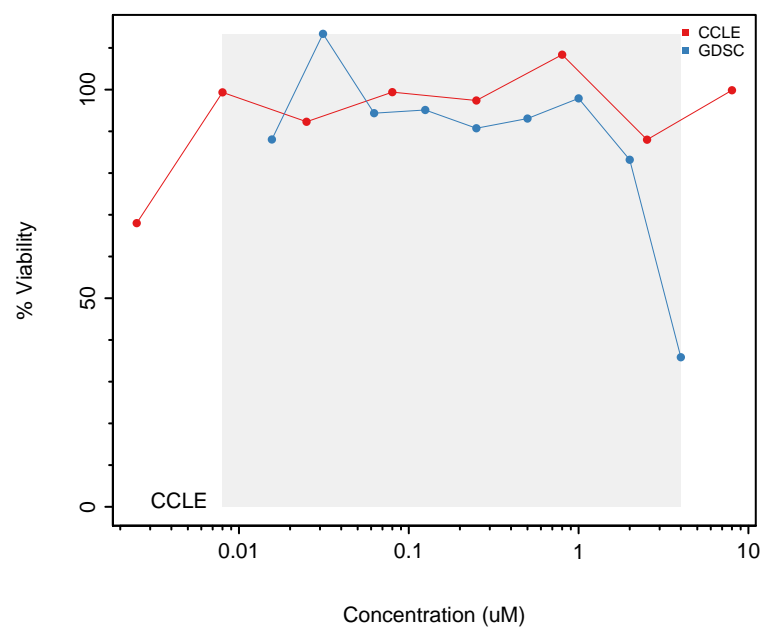

PD-0325901:HT-1376

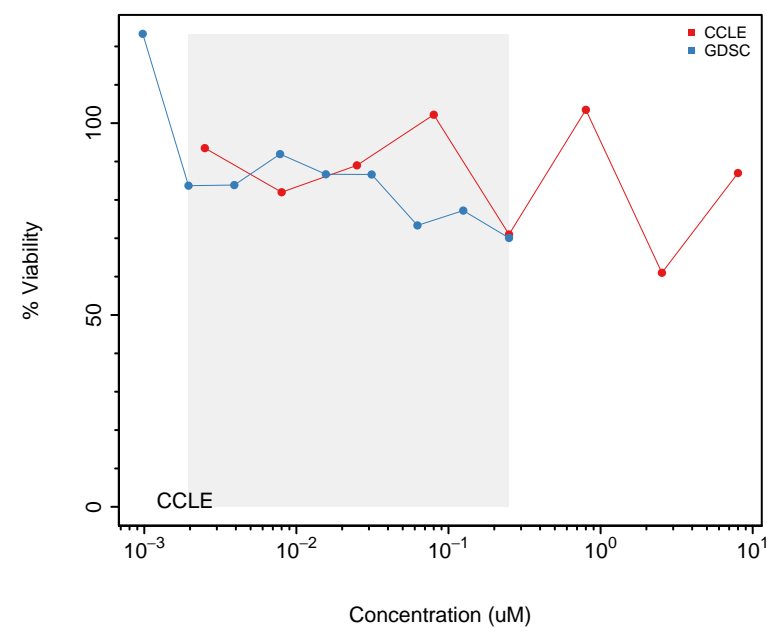

PD-0325901:NCI-H2452

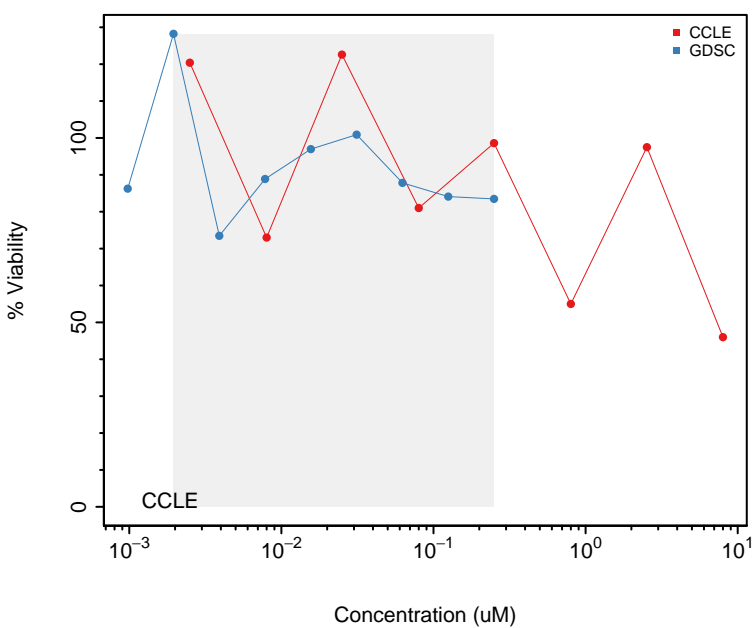

PD-0332991:MDA-MB-468

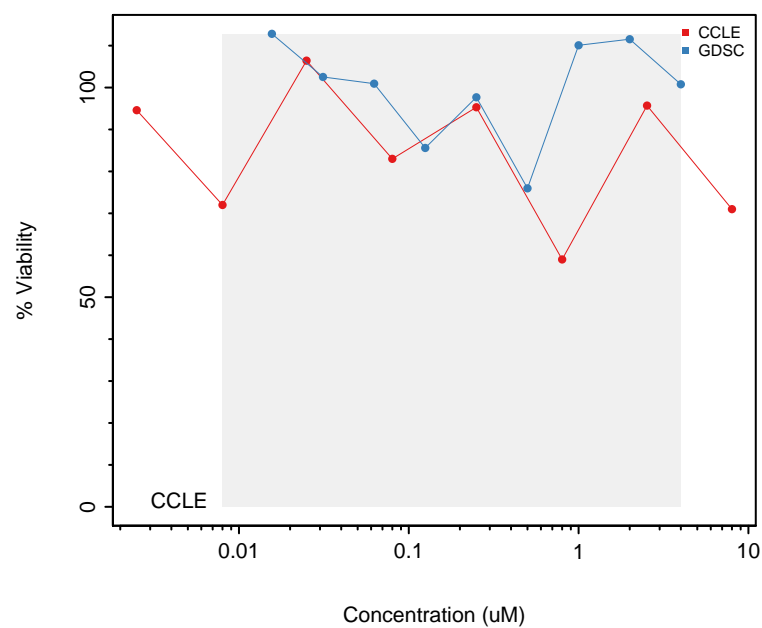

PD-0332991:MKN7

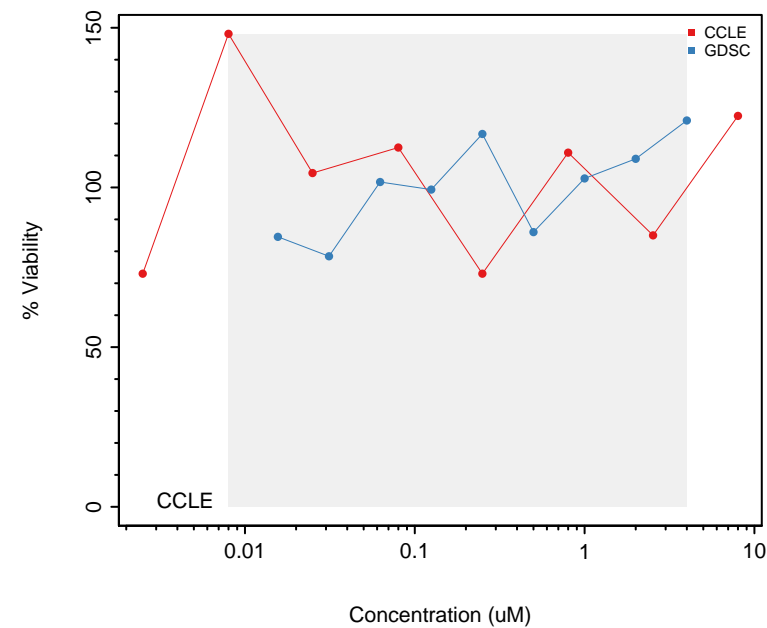

AZD6244:MCF7

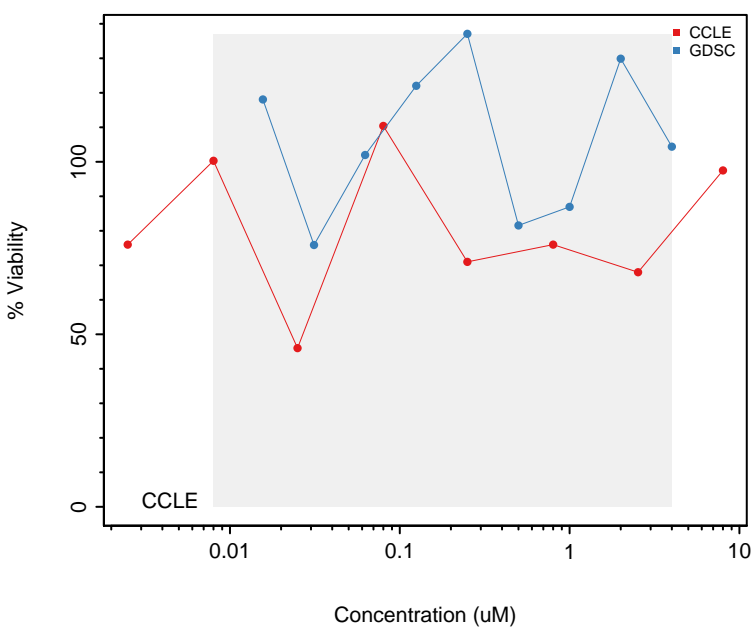

AZD6244:SK-N-FI

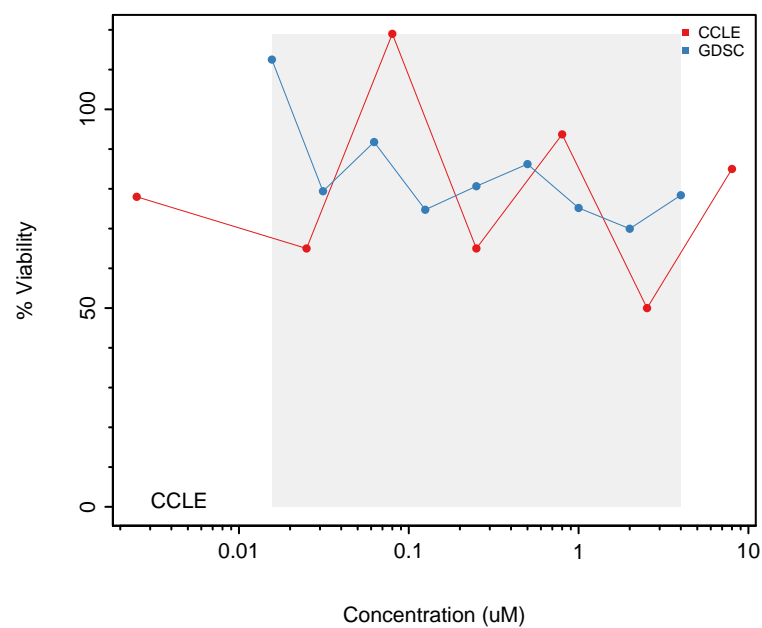

TAE684:SK-N-FI

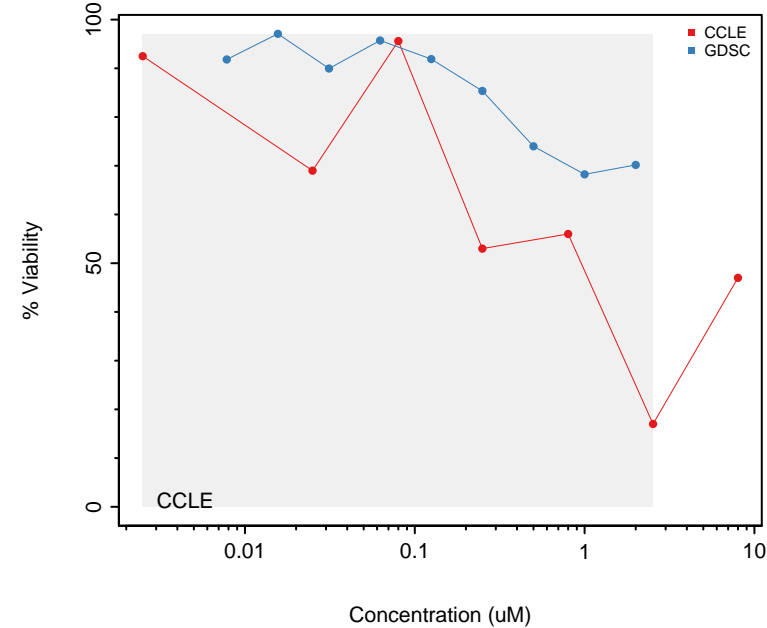

TAE684:TE-11

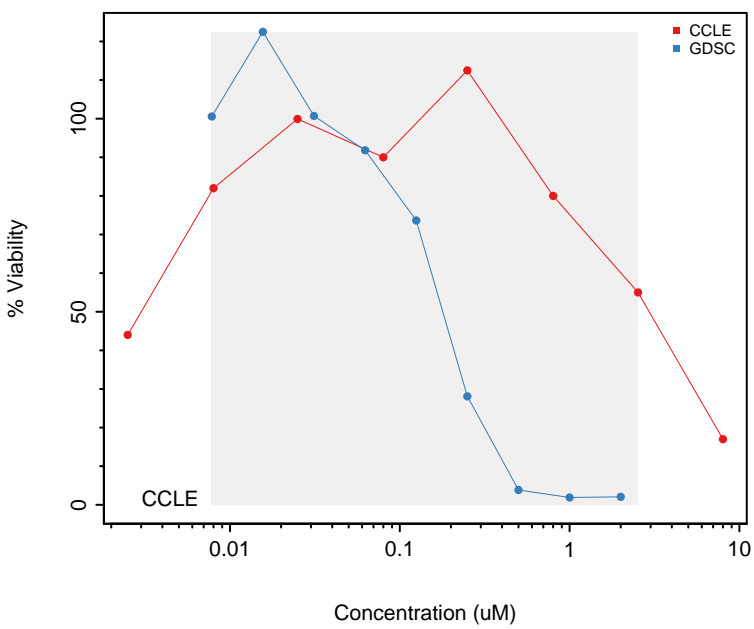

PLX4720:A673

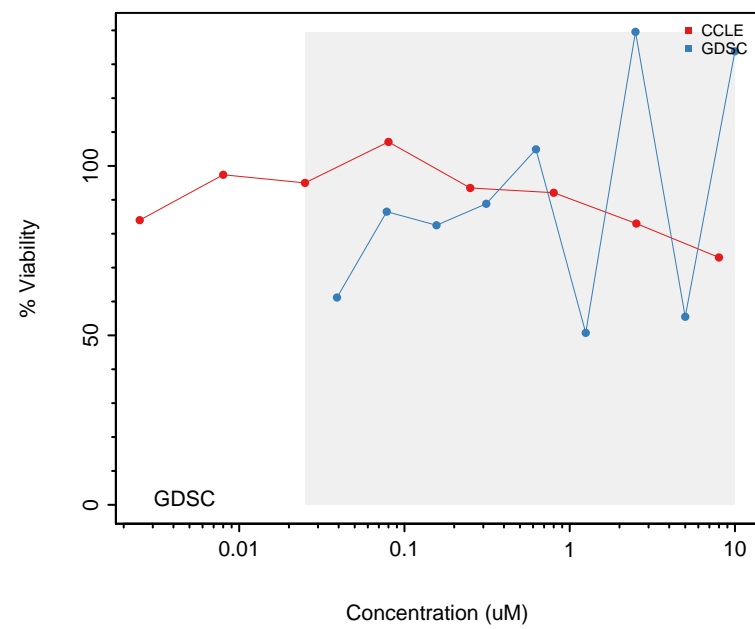

AZD6244:A673

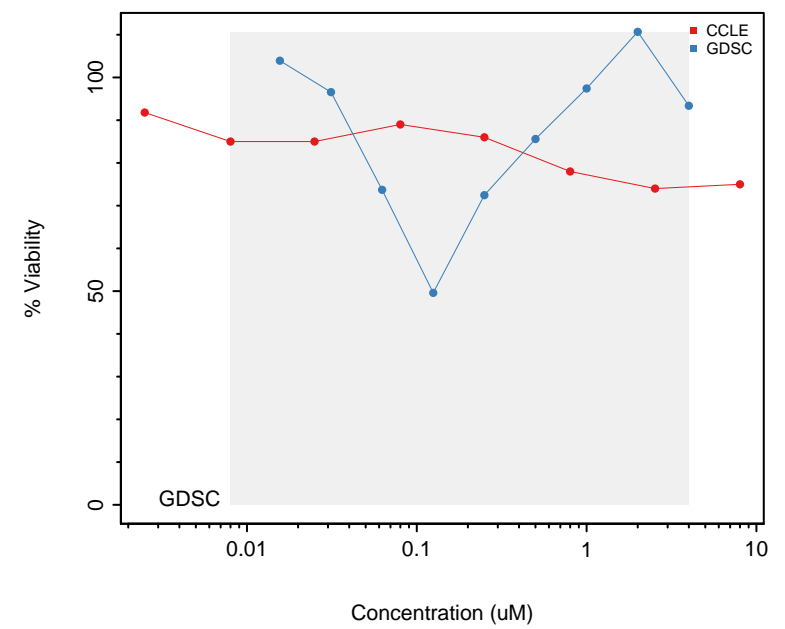

Nutlin-3:5637

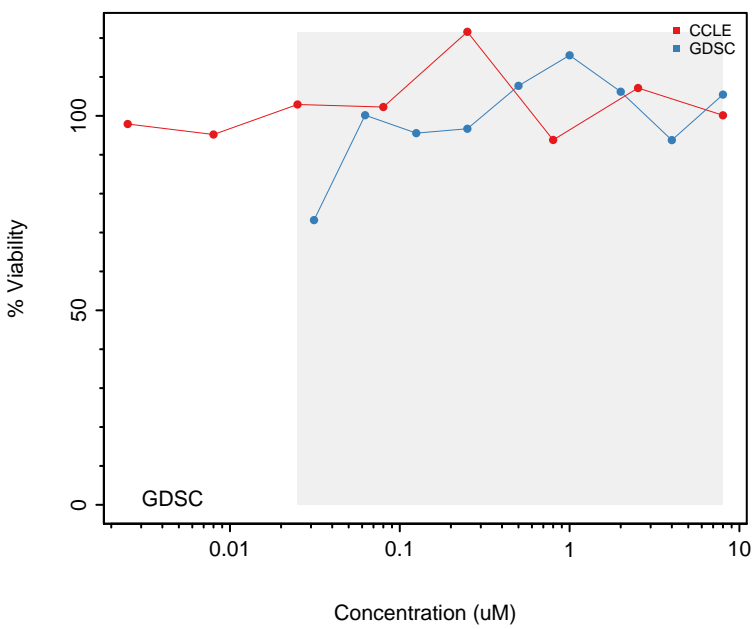

PD-0325901:RT4

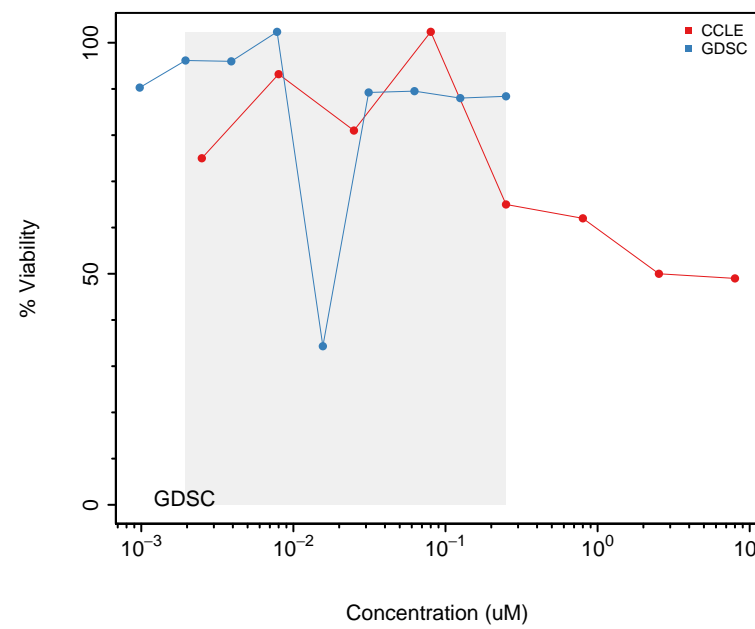

AZD6244:RT4

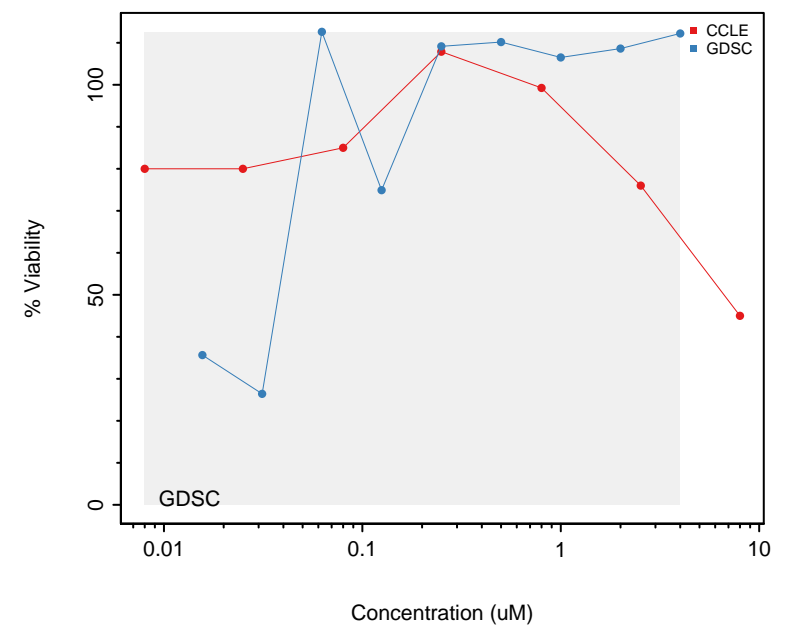

Nilotinib:TCCSUP

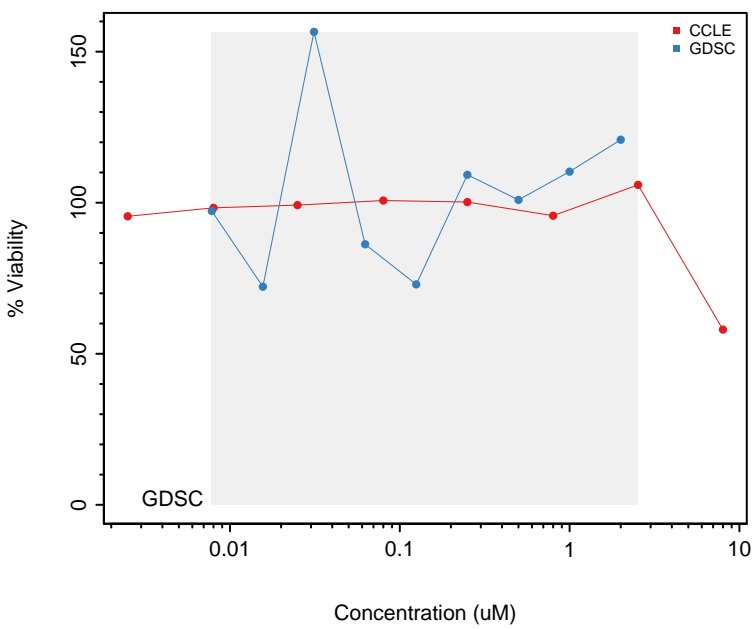

Nutlin-3:TCCSUP

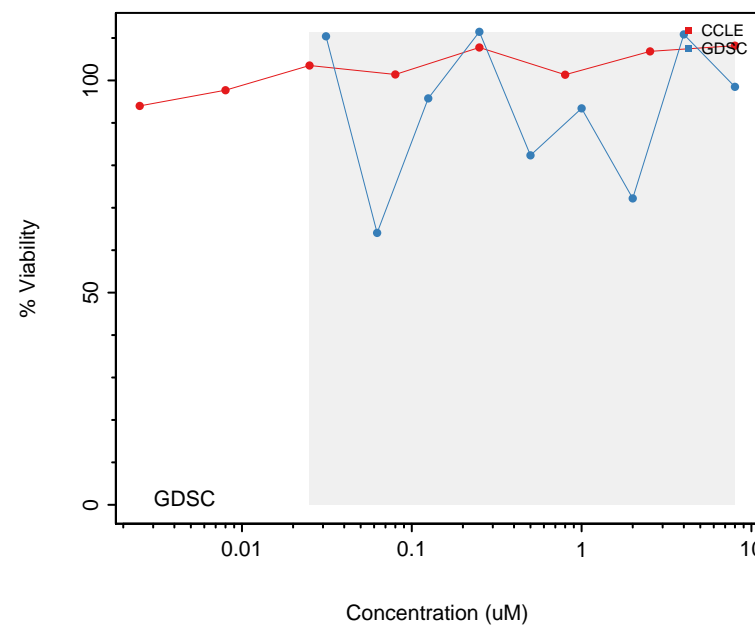

PD-0325901:TCCSUP

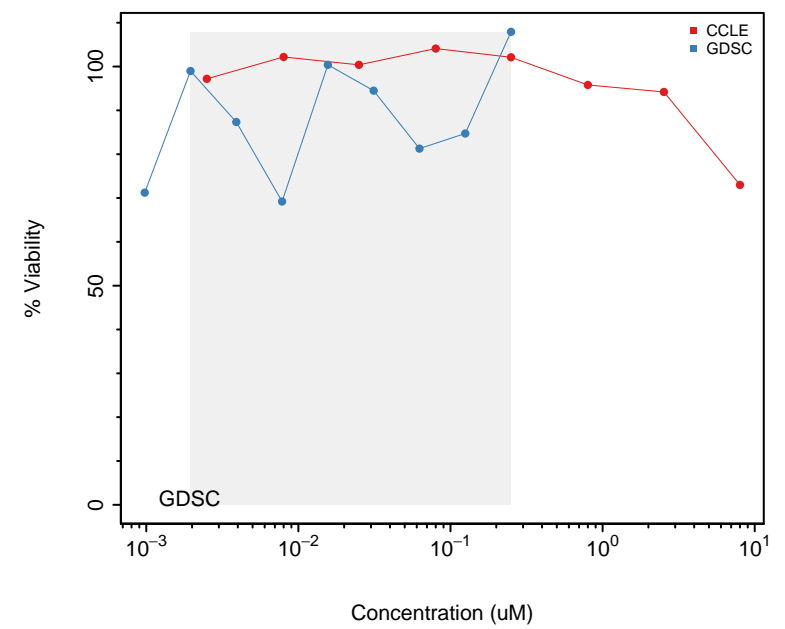

17-AAG:GB-1

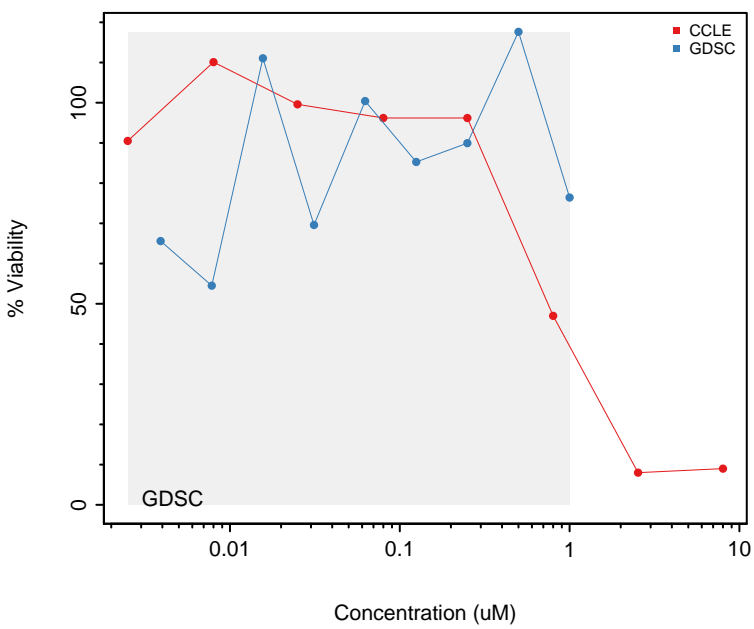

Nilotinib:NCI-H1648

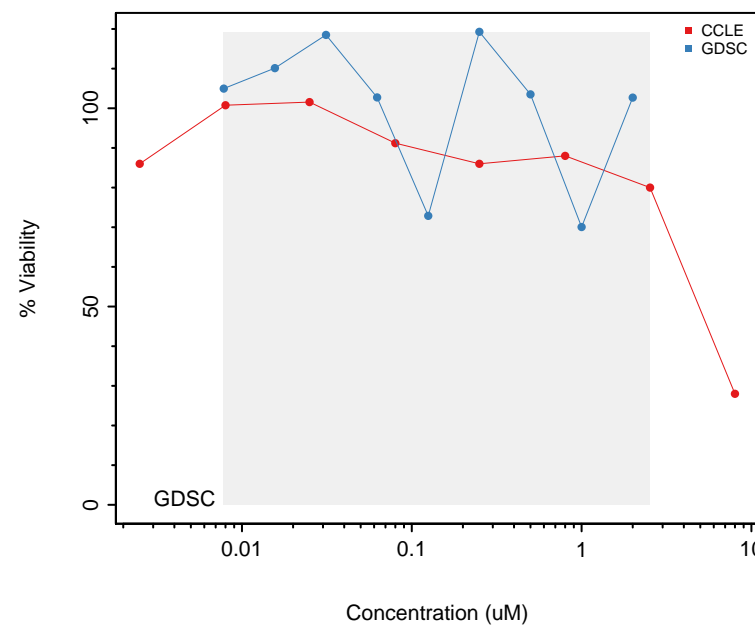

Nutlin-3:NCI-H1648

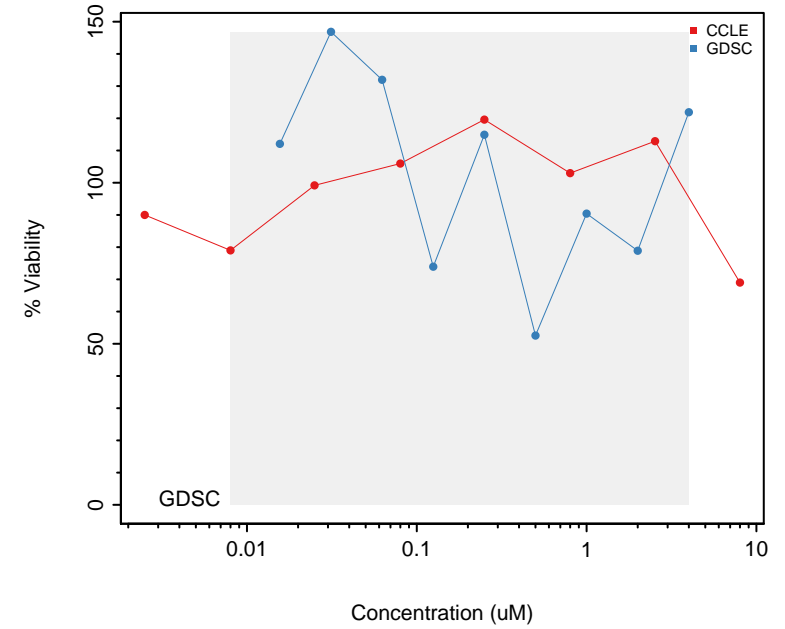

Nutlin-3:NCI-H1693

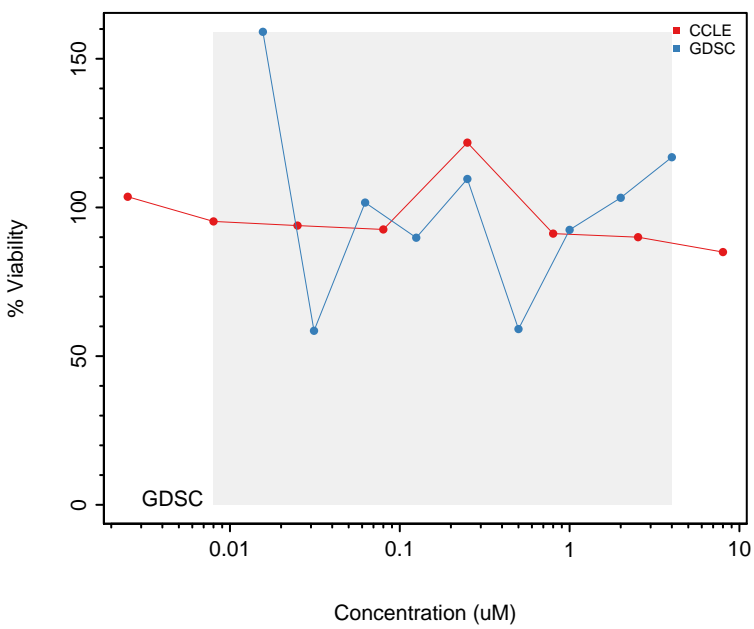

PD-0332991:NCI-H1693

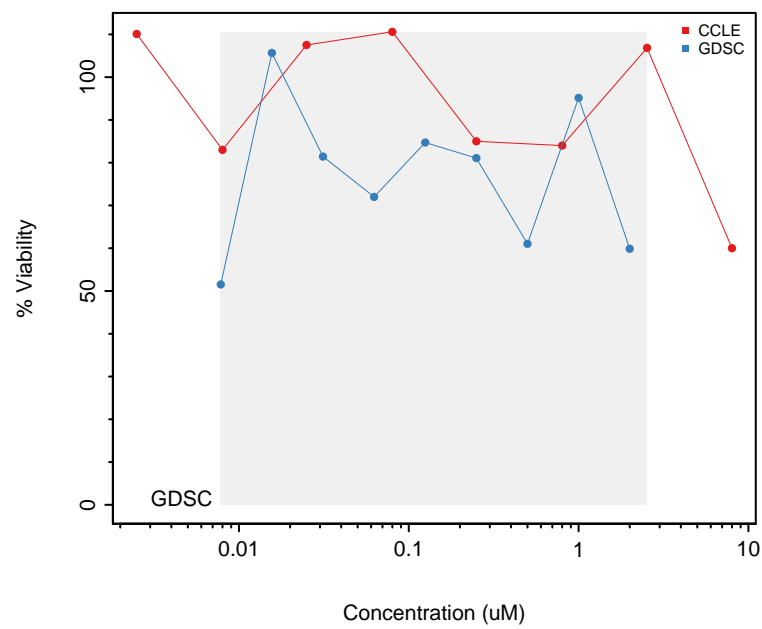

PD-0325901:NCI-H1693

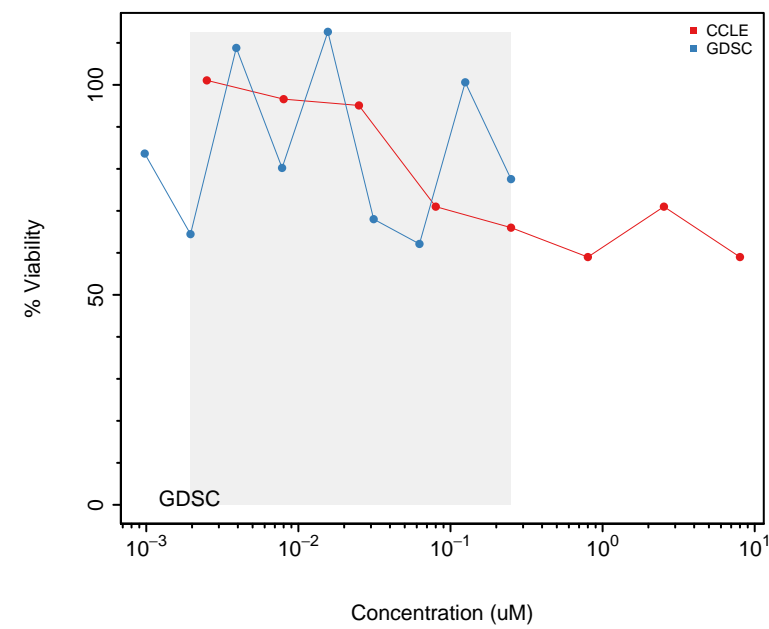

Nilotinib:NCI-H2170

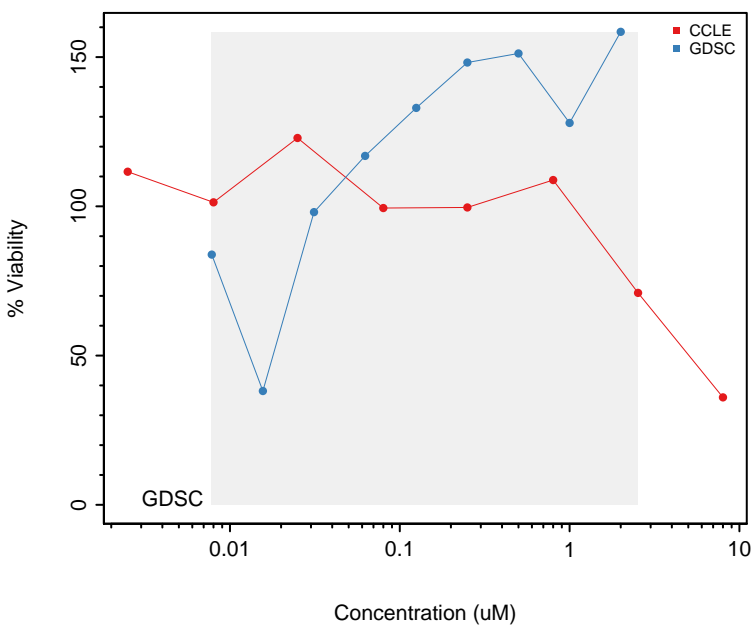

PD-0325901:NCI-H2228

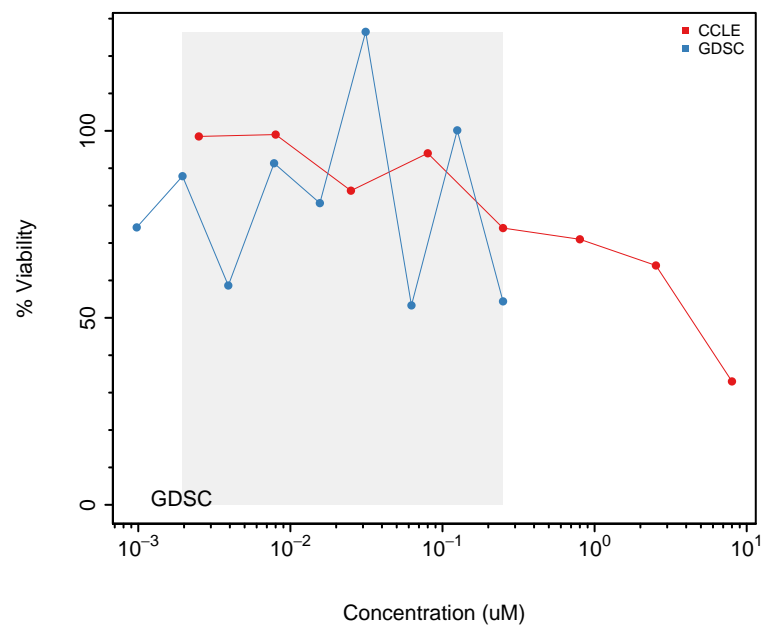

AZD6244:NCI-H2228

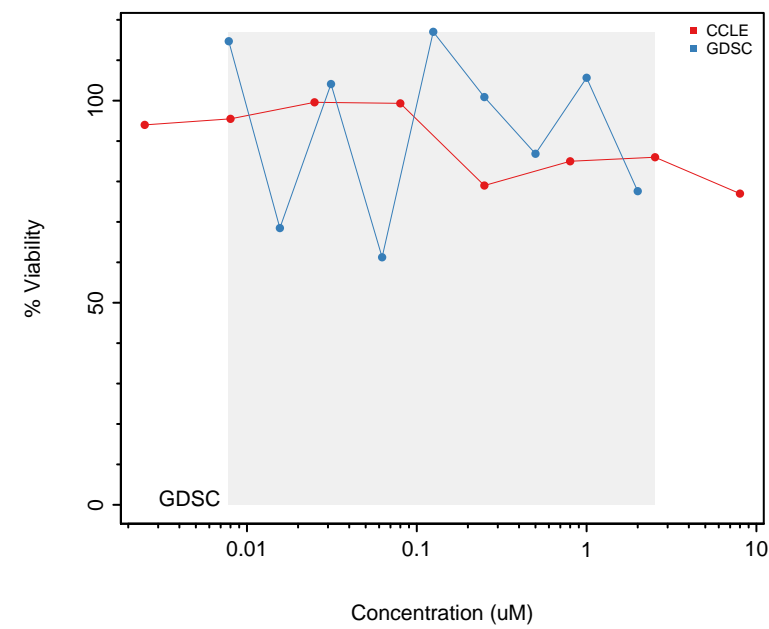

Nilotinib:NCI-H1048

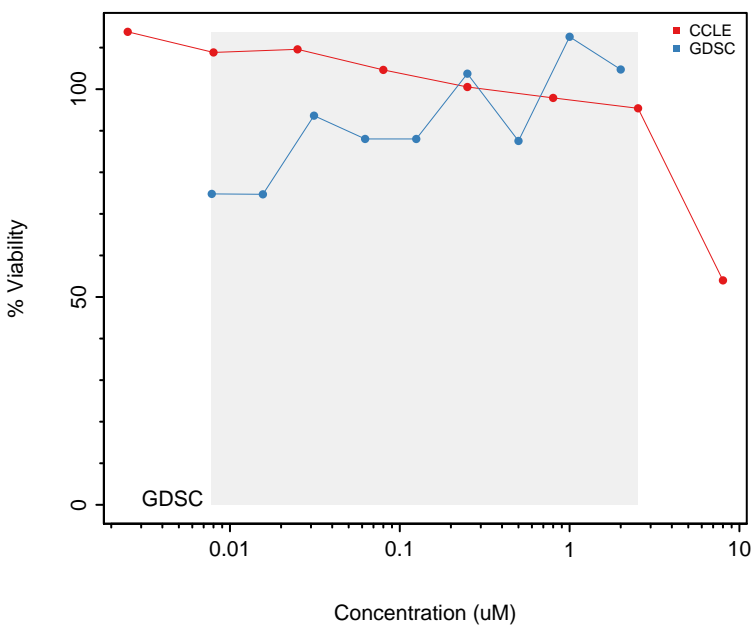

17-AAG:SK-N-DZ

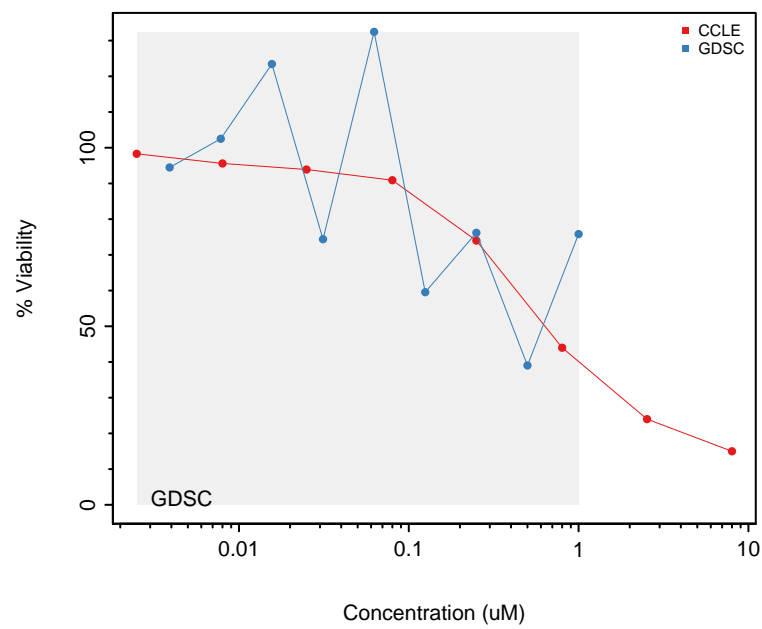

Nutlin-3:SK-N-DZ

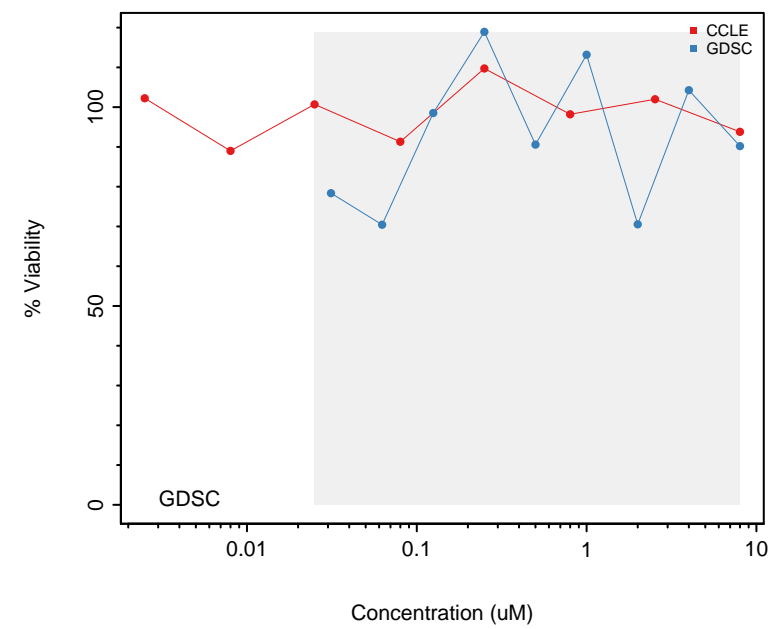

PD-0332991:SK-N-DZ

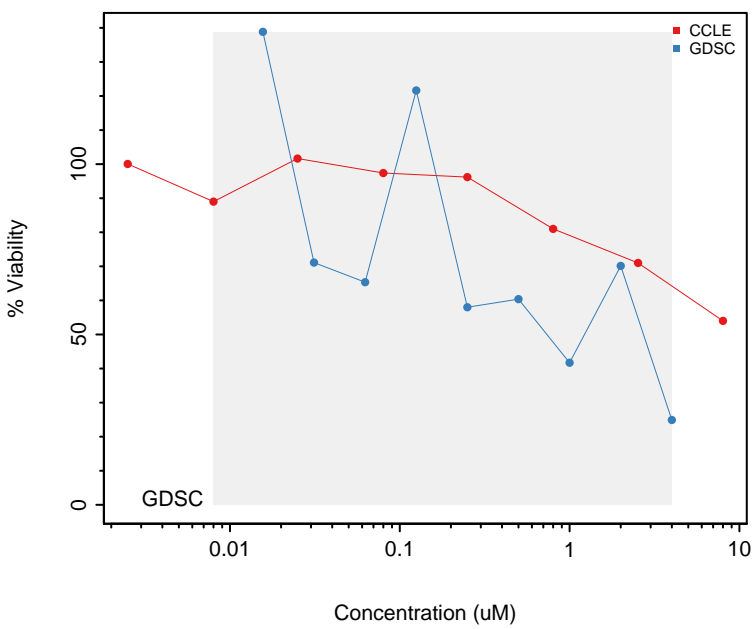

Nilotinib:NCI-H2030

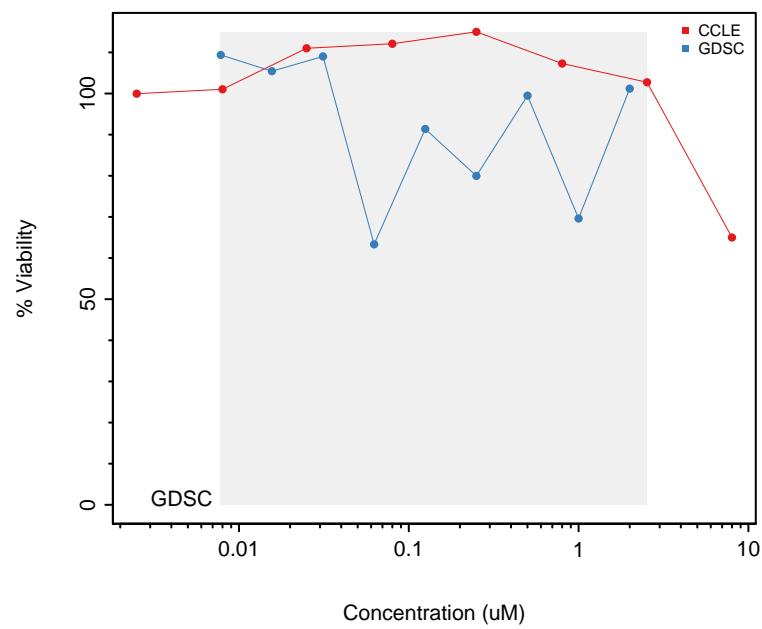

Nilotinib:T-24

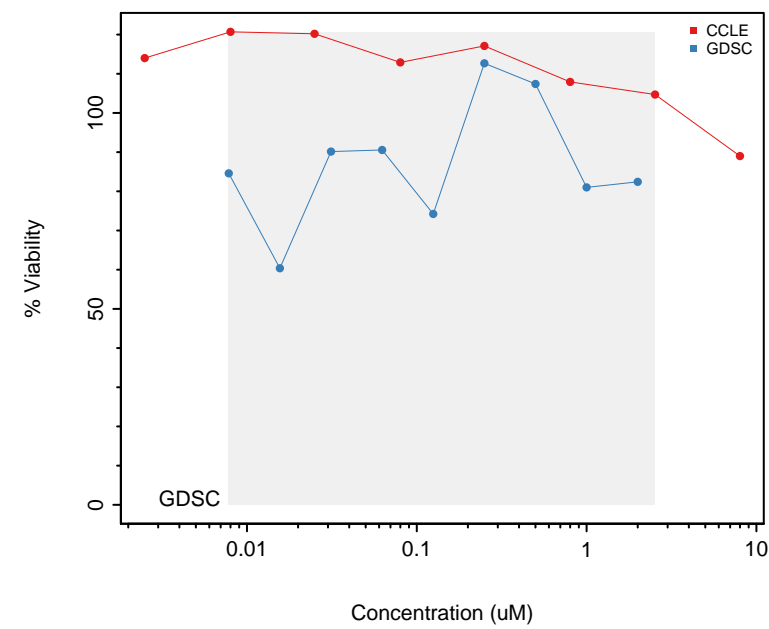

AZD6244:T-24

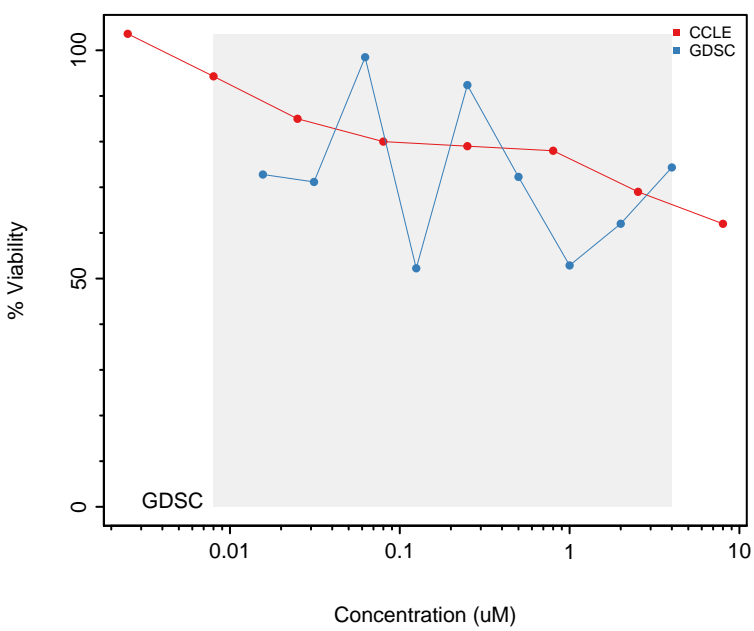

PLX4720:NCI-H727

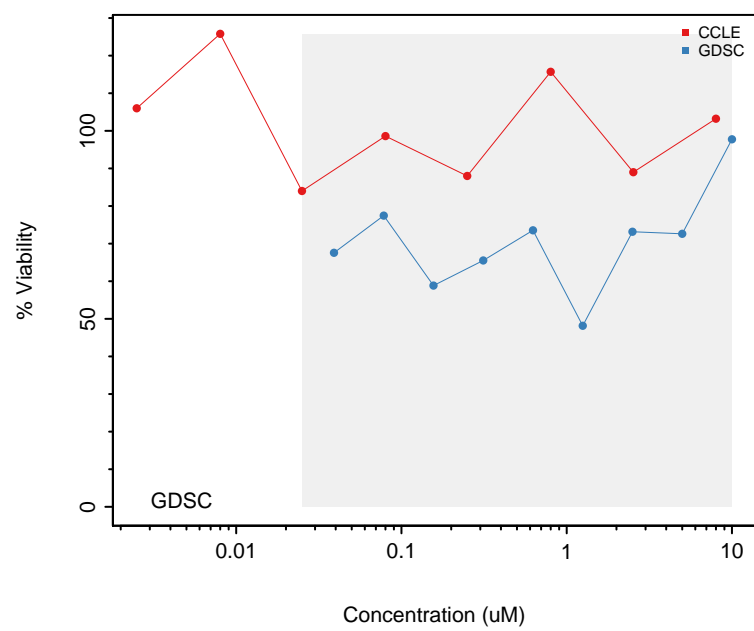

PD-0332991:NCI-H727

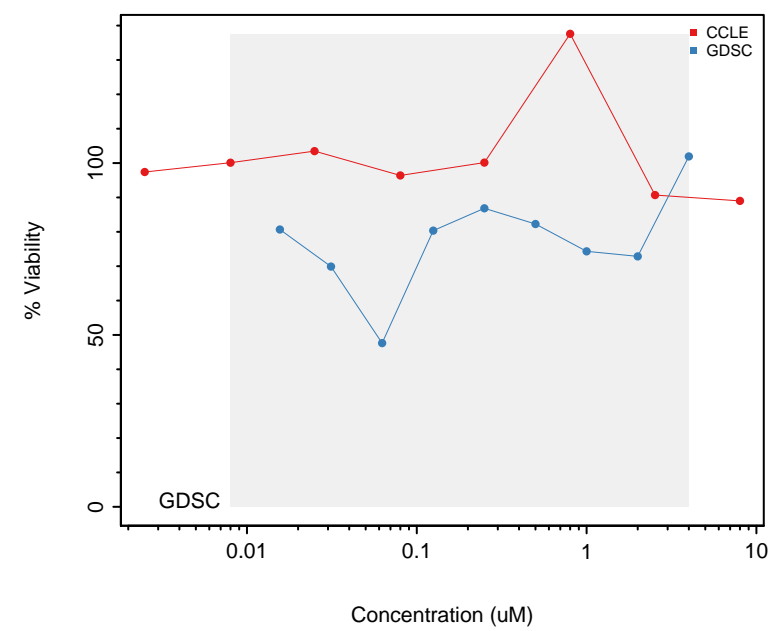

PD-0325901:NCI-H727

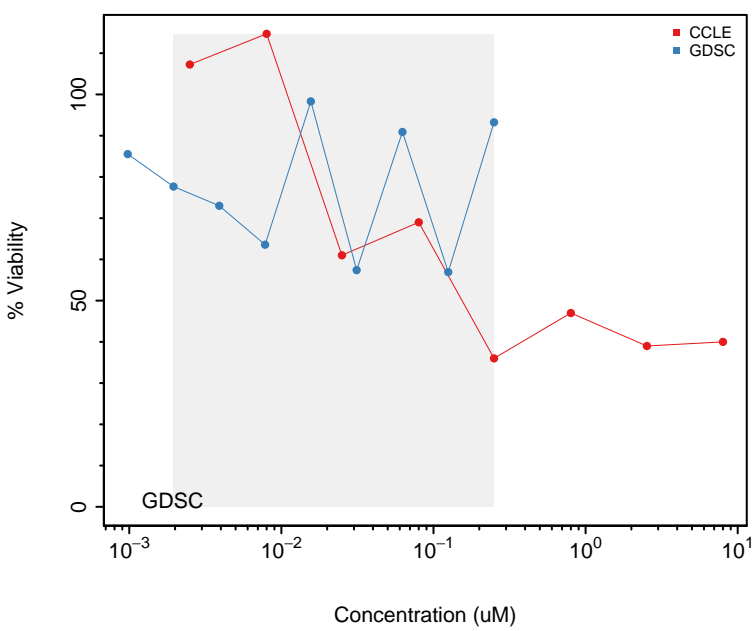

lapatinib:Calu-6

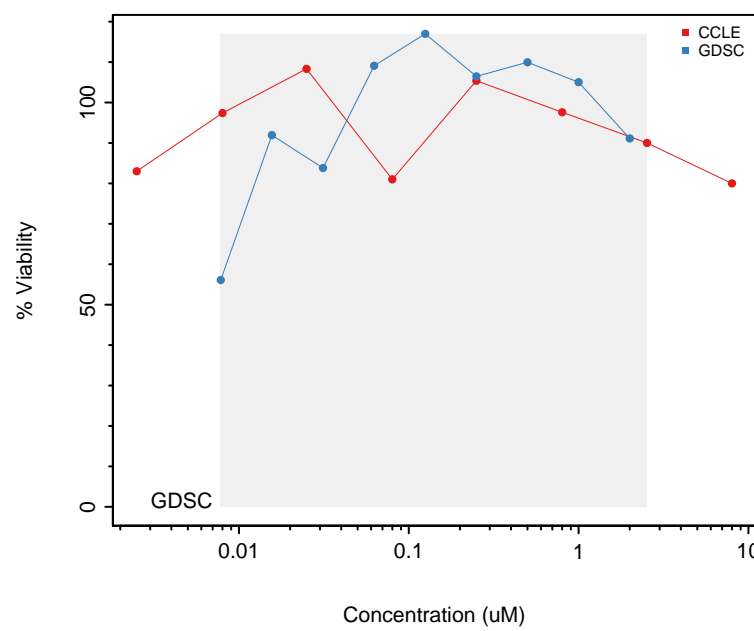

Nutlin-3:NCI-H1355

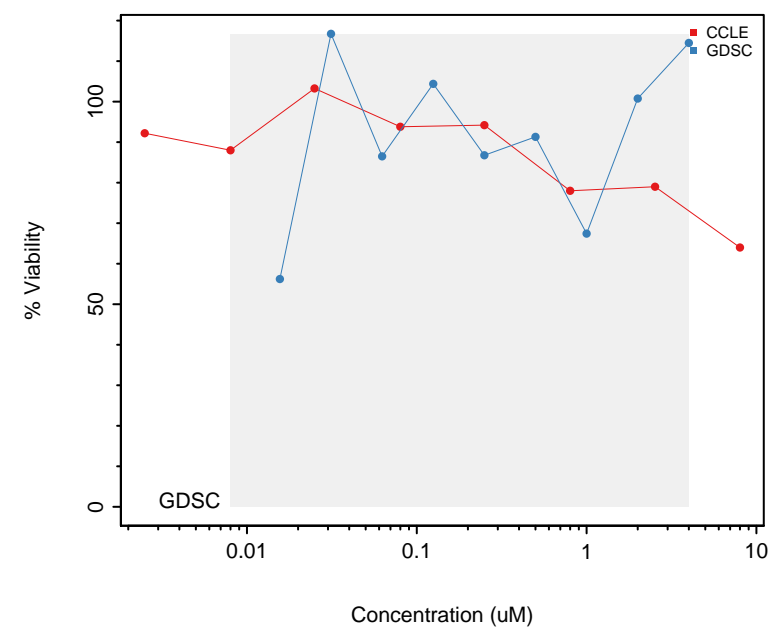

PD-0325901:NCI-H1355

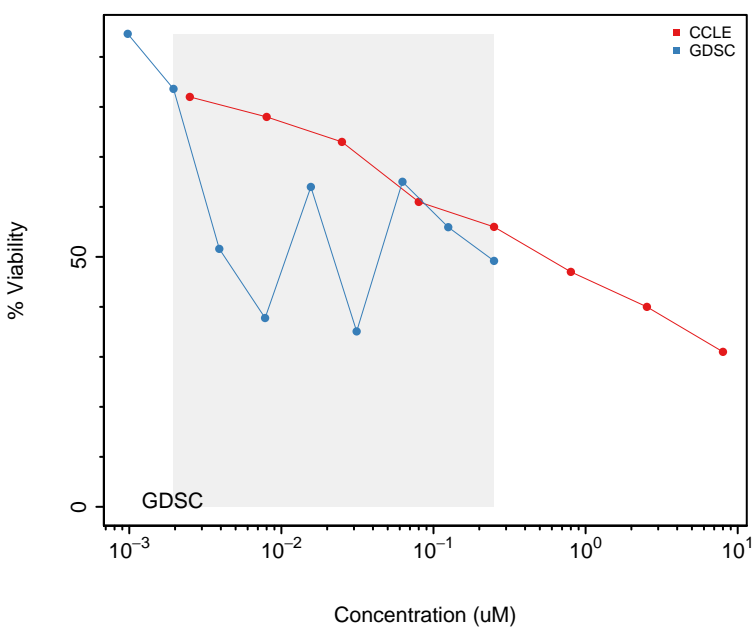

PLX4720:NCI-H1792

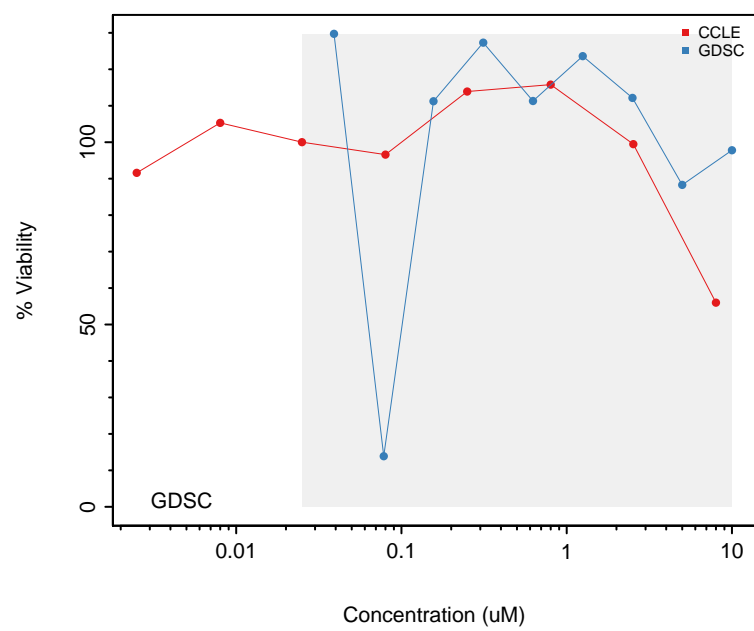

AZD6244:HPAF-II

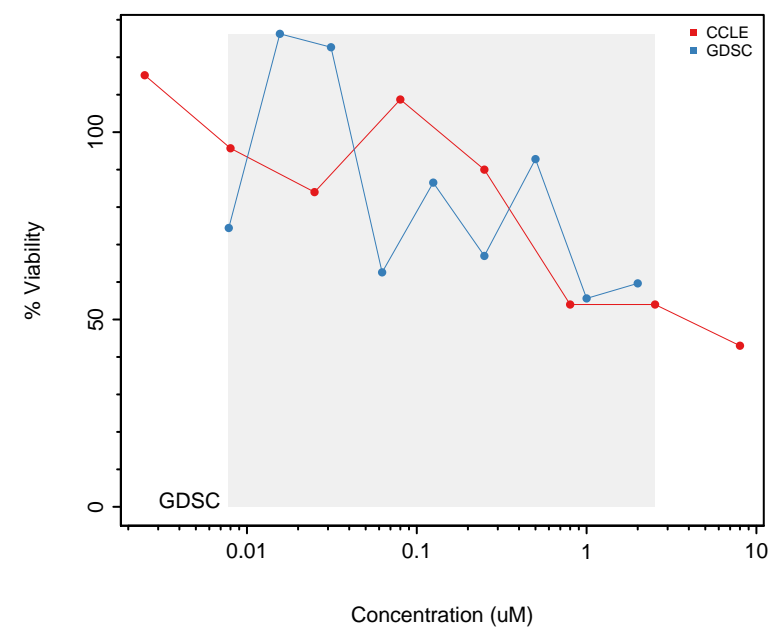

Nilotinib:KP-4

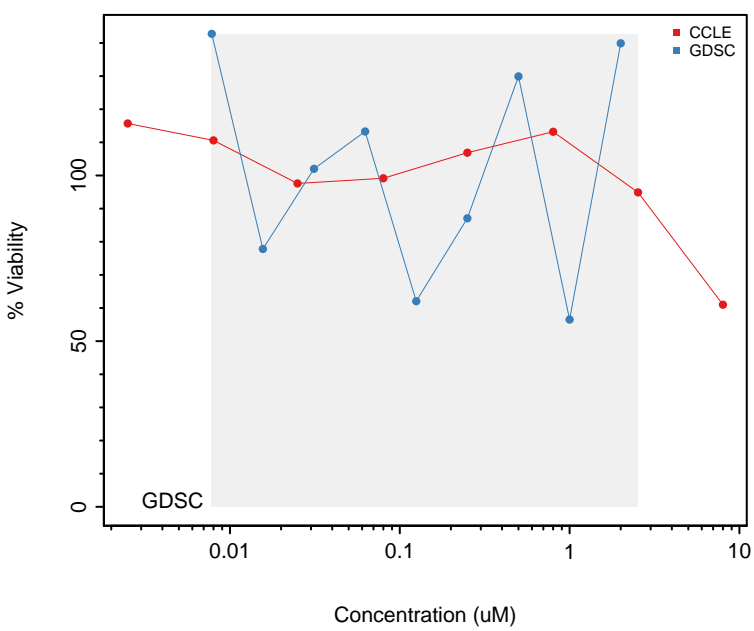

Nutlin-3:KP-4

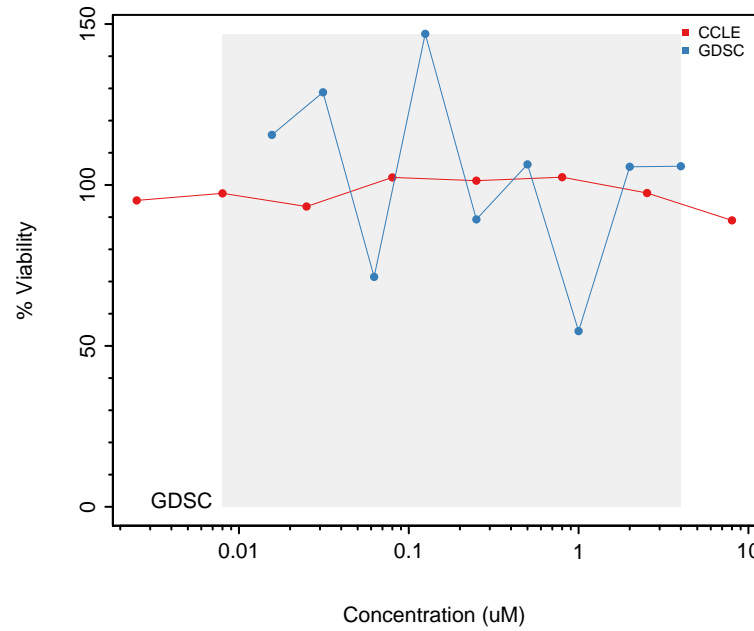

PD-0325901:KP-4

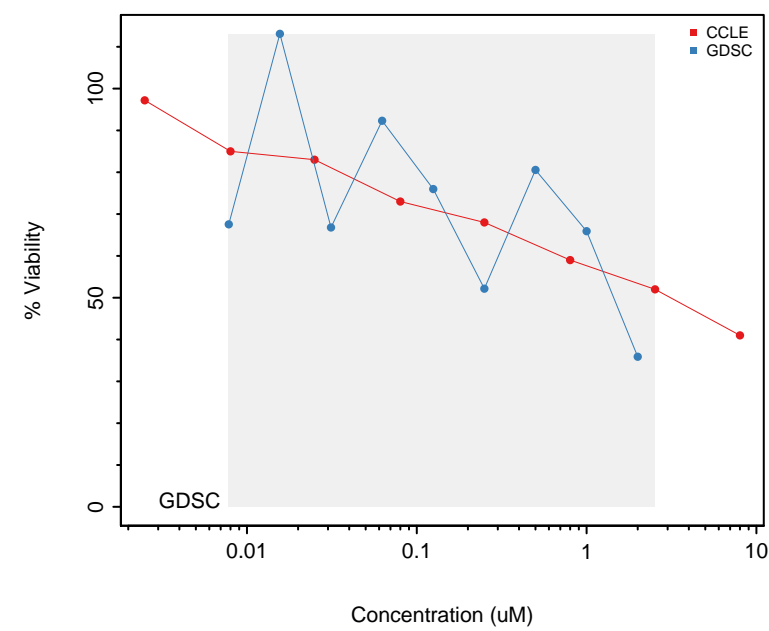

PD-0332991:KYSE-520

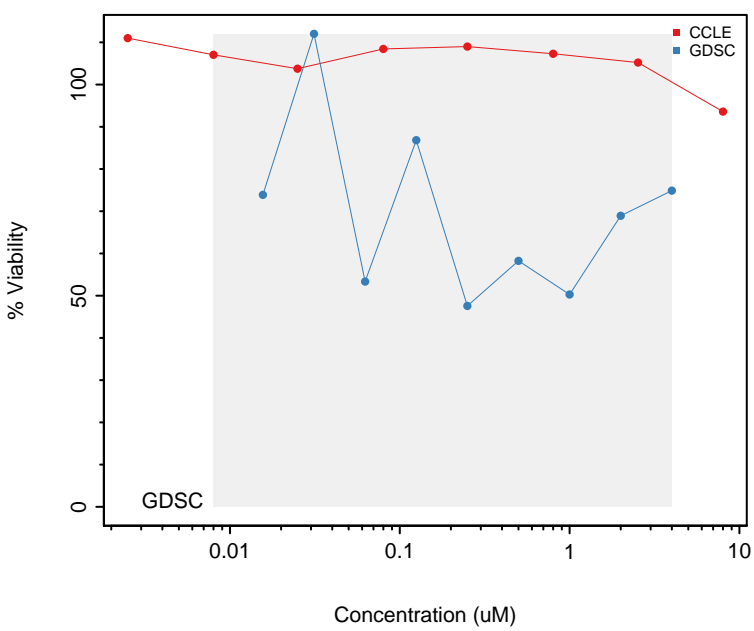

PD-0325901:KYSE-70

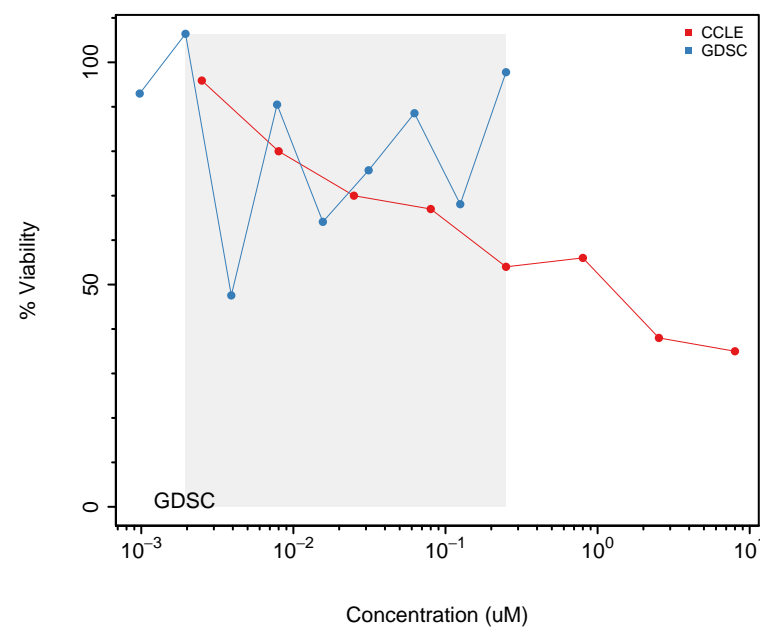

PD-0325901:LCLC-103H

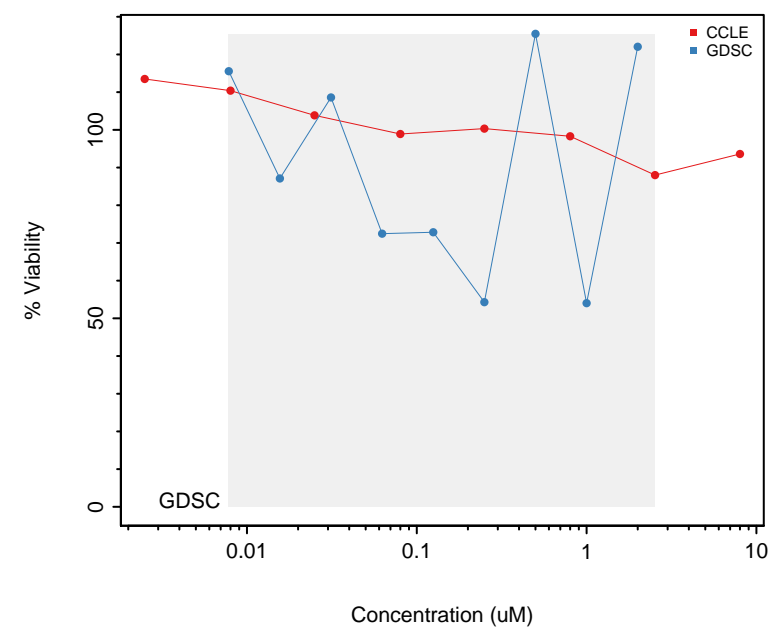

Nilotinib:PC-3

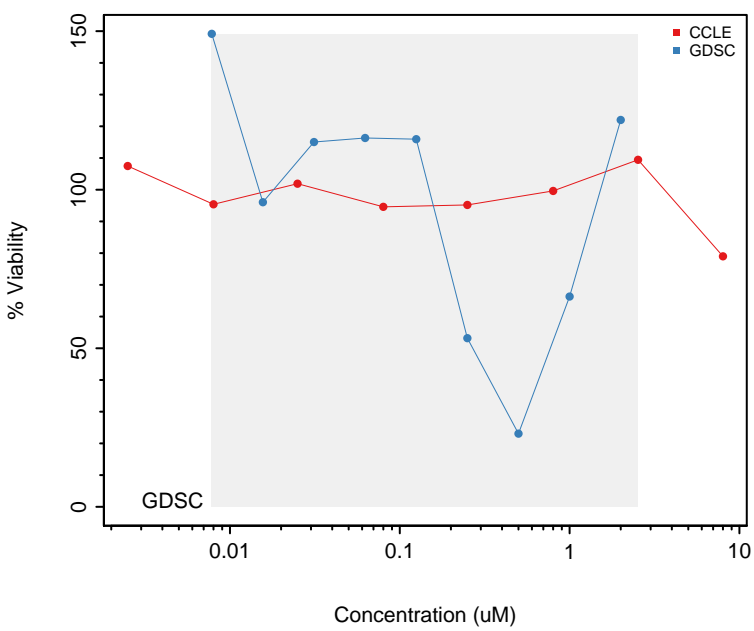

PLX4720:PC-3

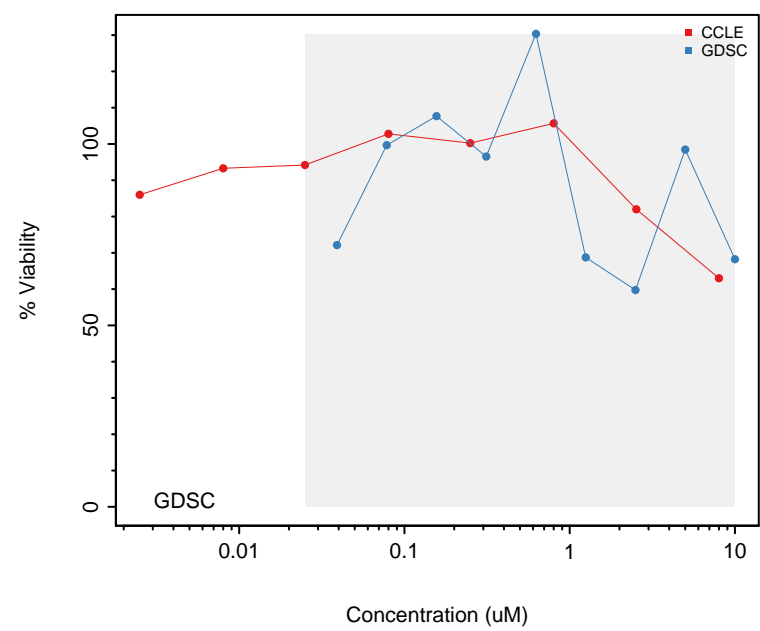

PD-0332991:PC-3

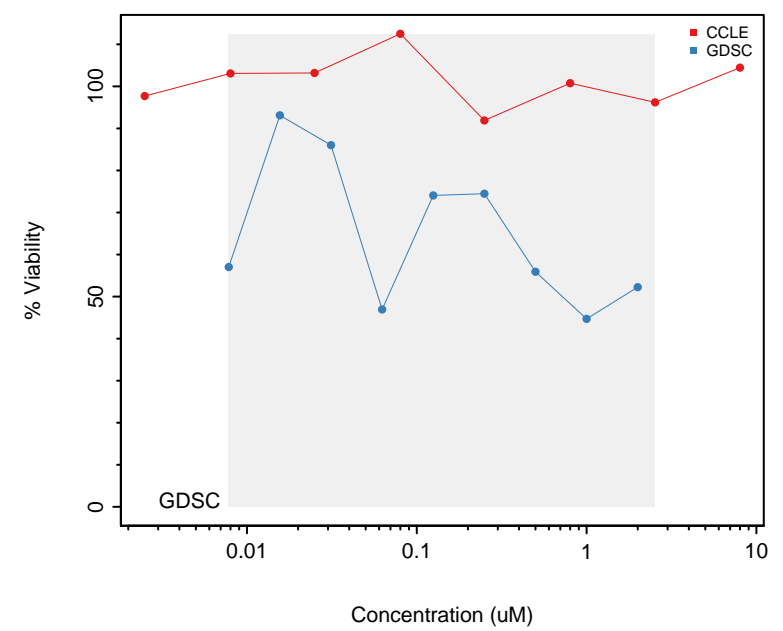

PD-0325901:PC-3

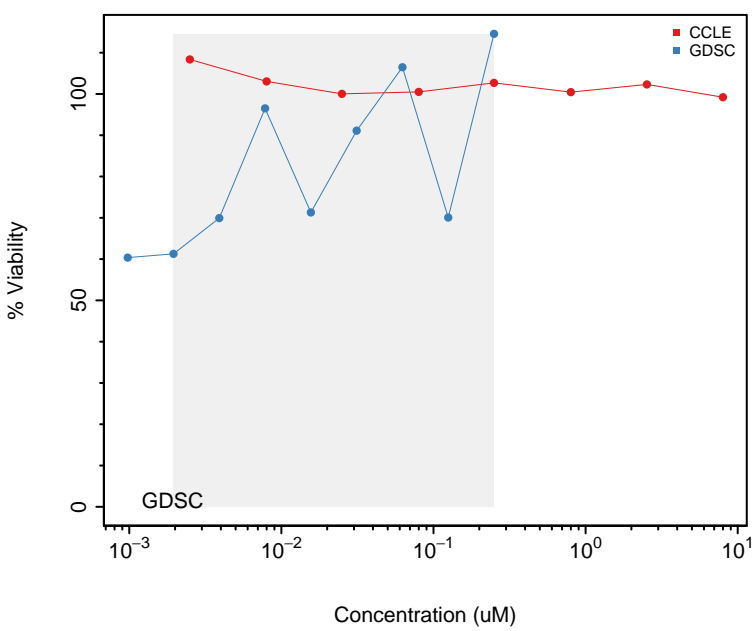

AZD6244:PC-3

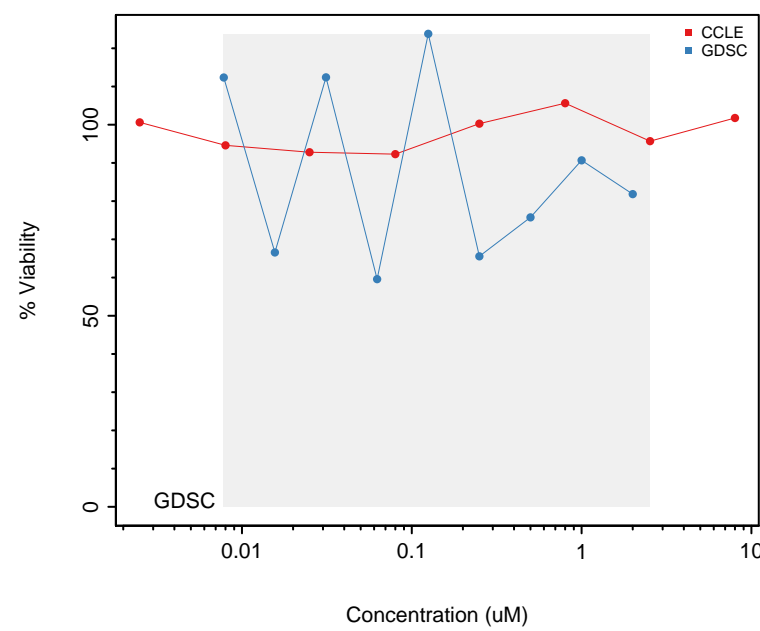

Nilotinib:DU-145

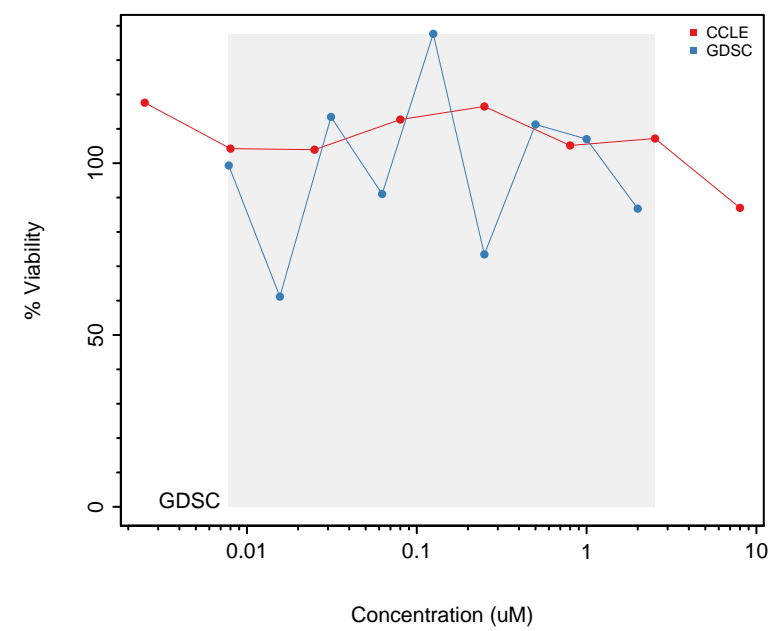

Nutlin-3:NCI-H23

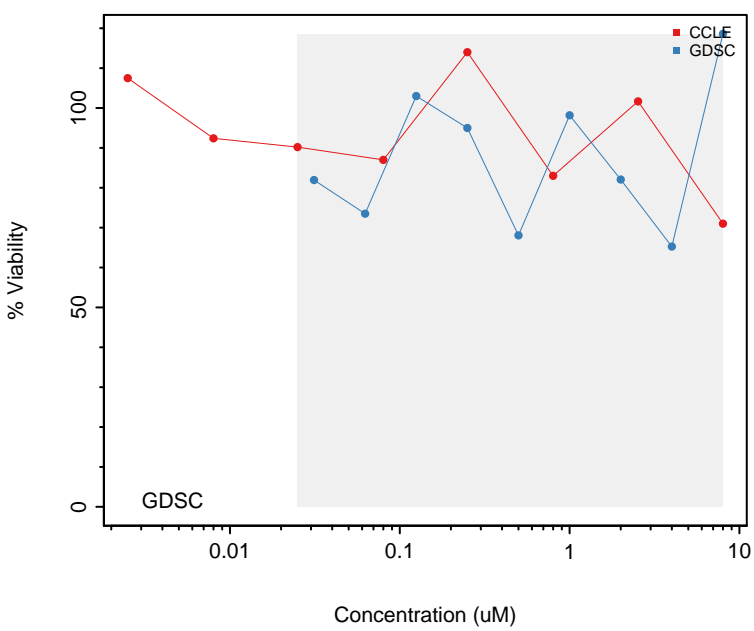

PLX4720:MCF7

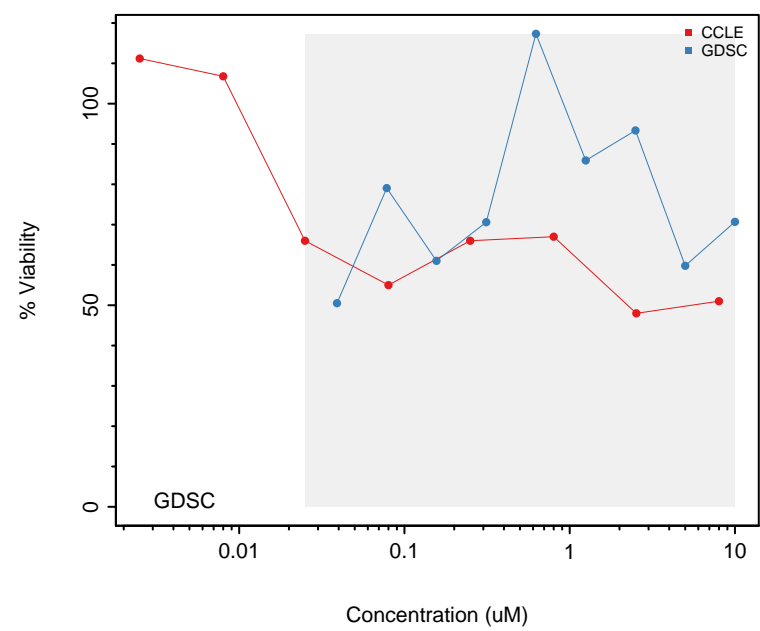

PLX4720:ACHN

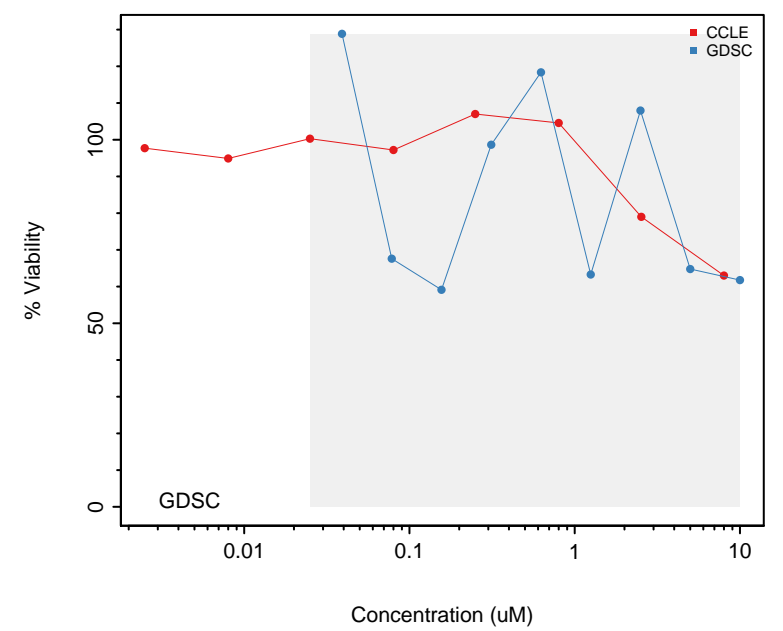

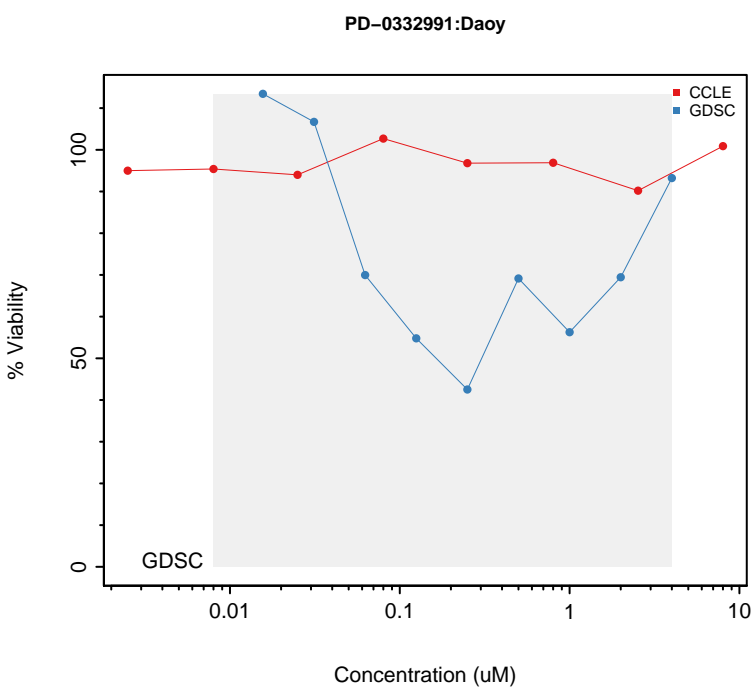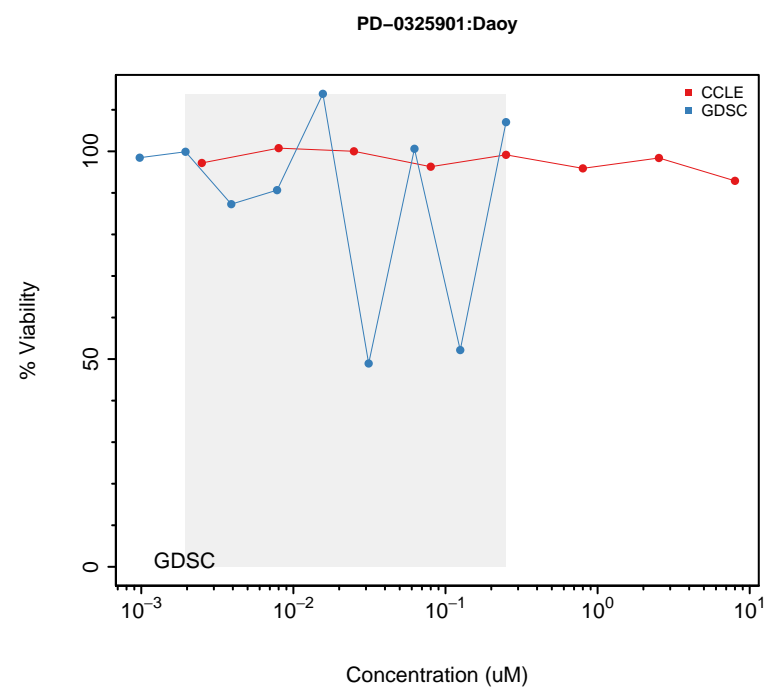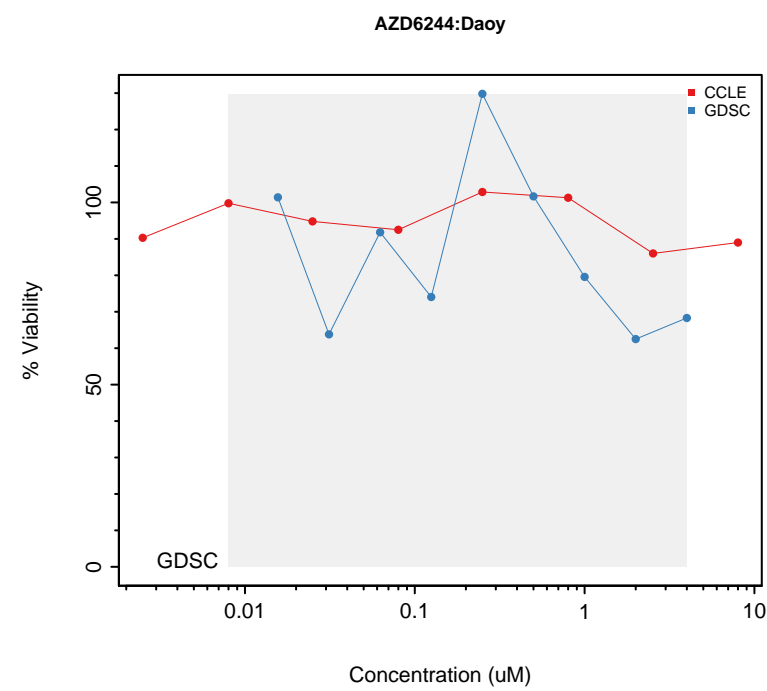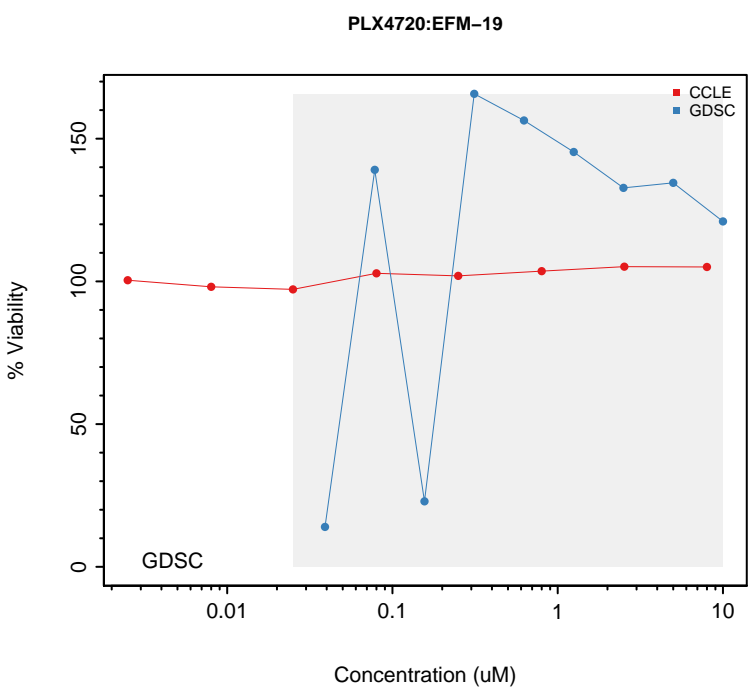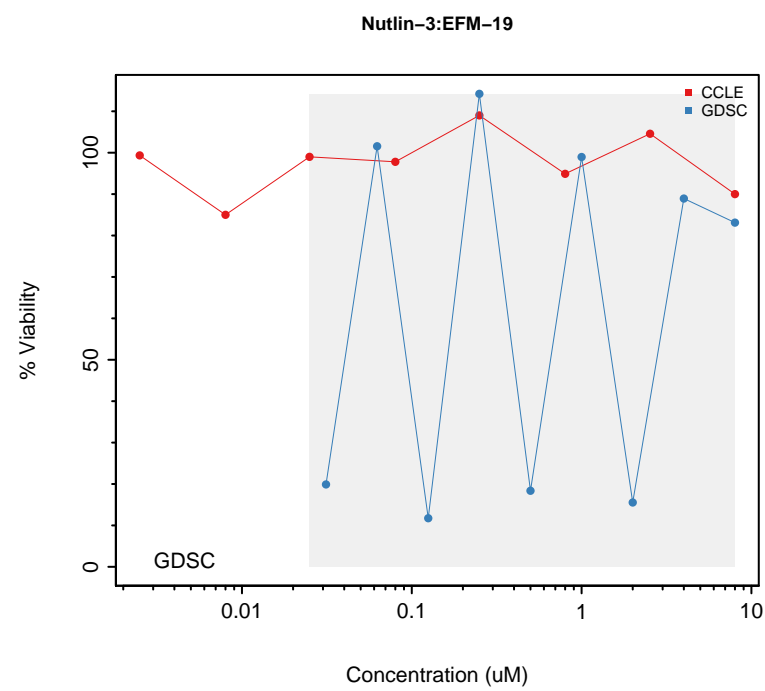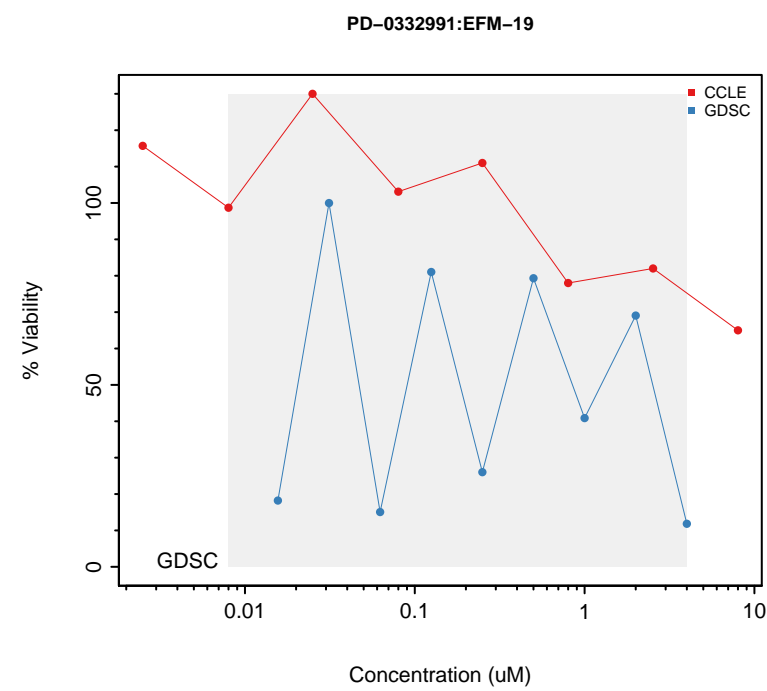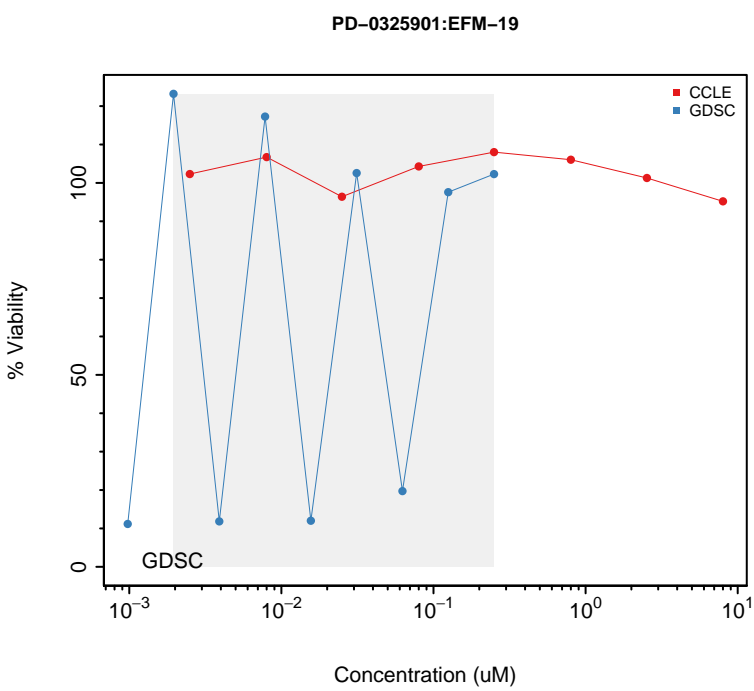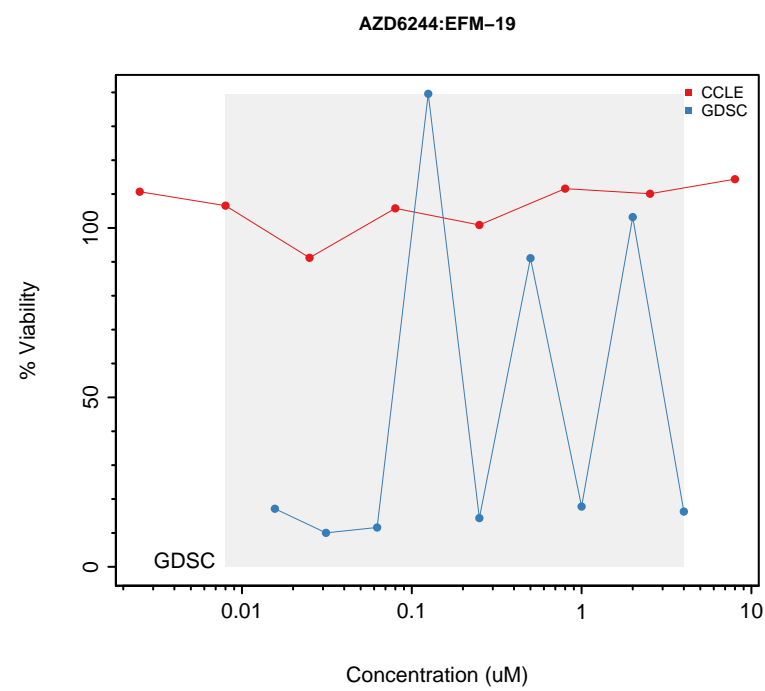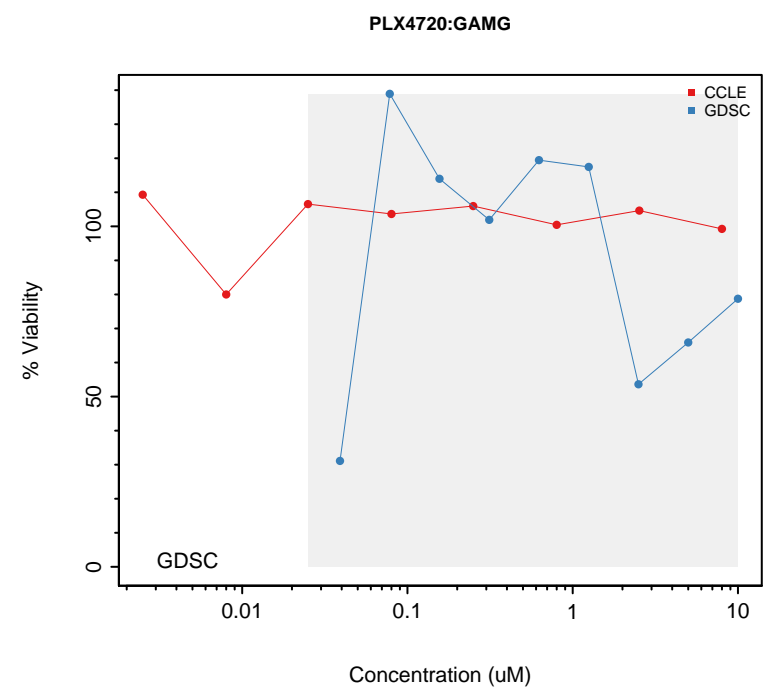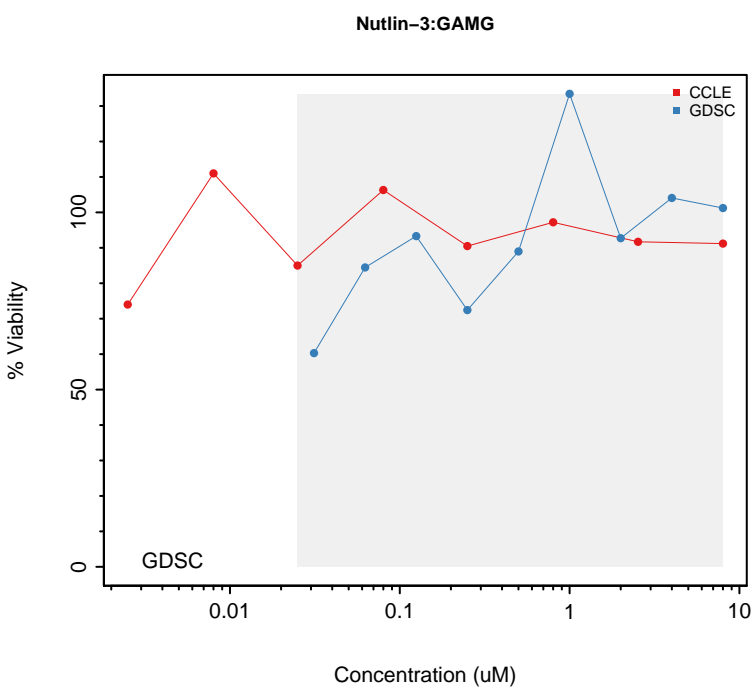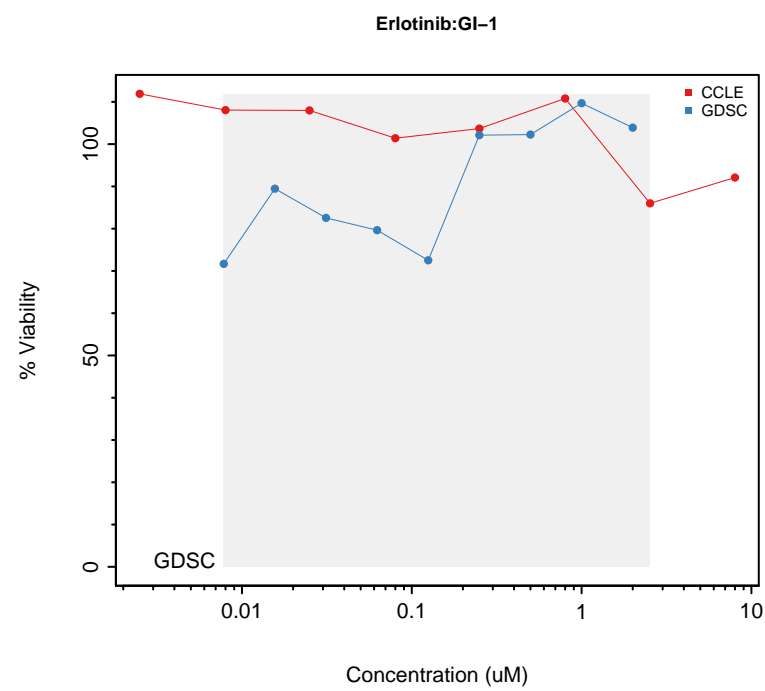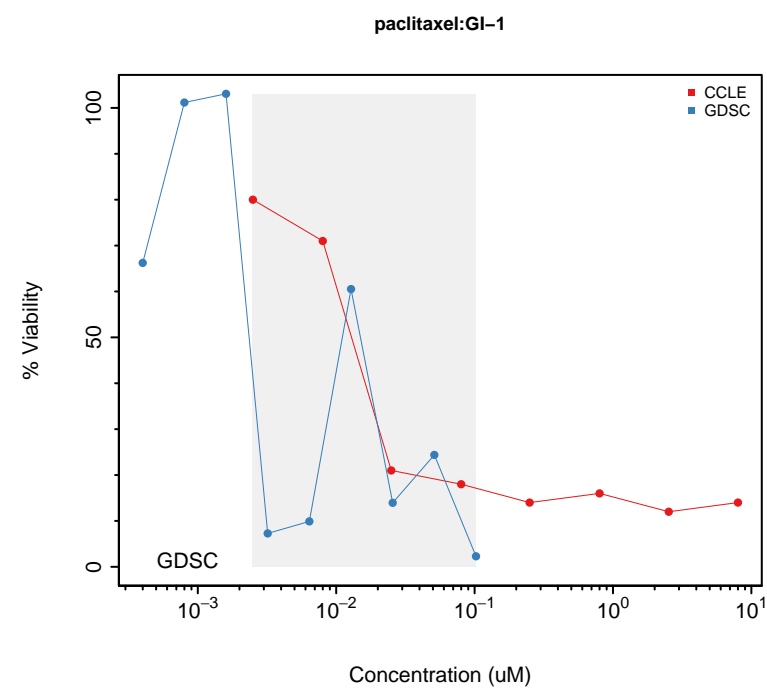

Nilotinib:GCT

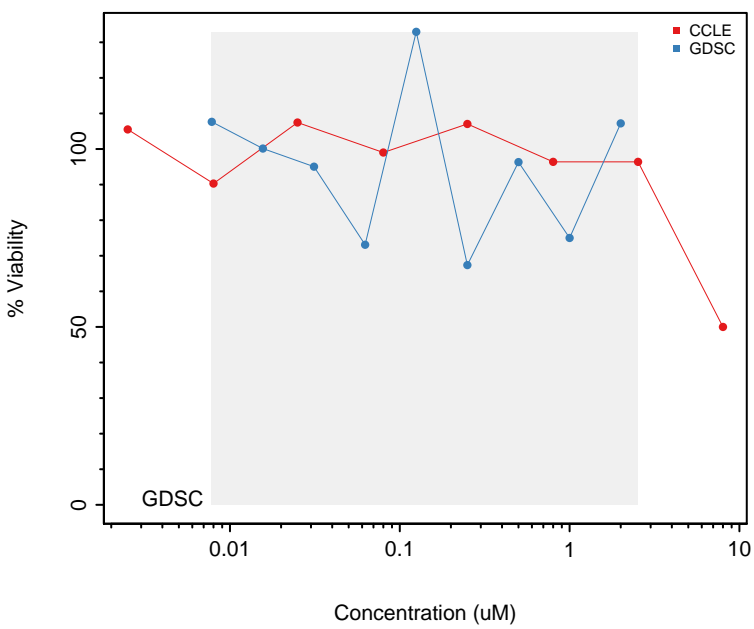

PD-0325901:GCT

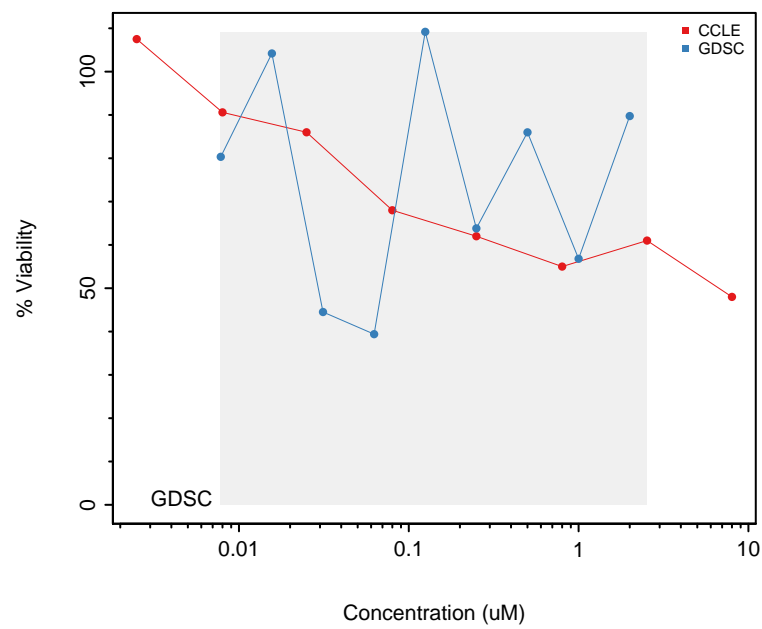

AZD6244:HCC1806

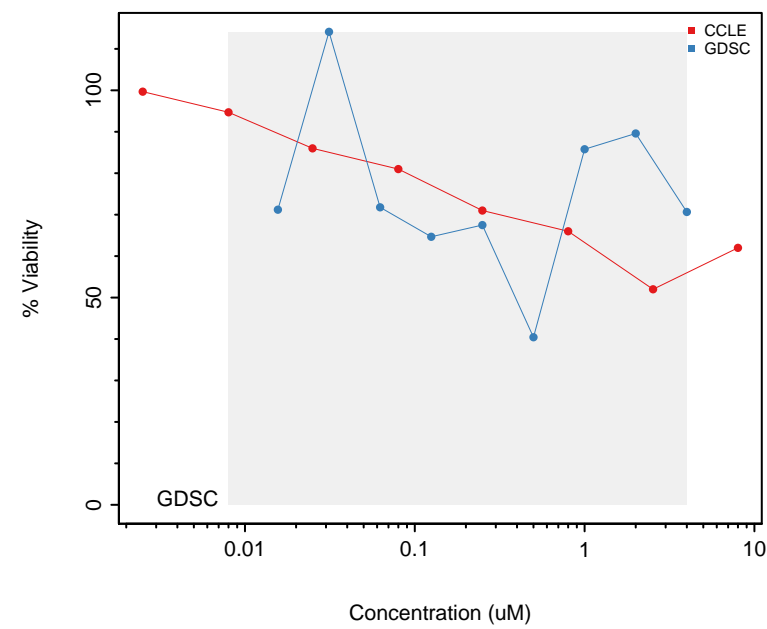

17-AAG:HCC70

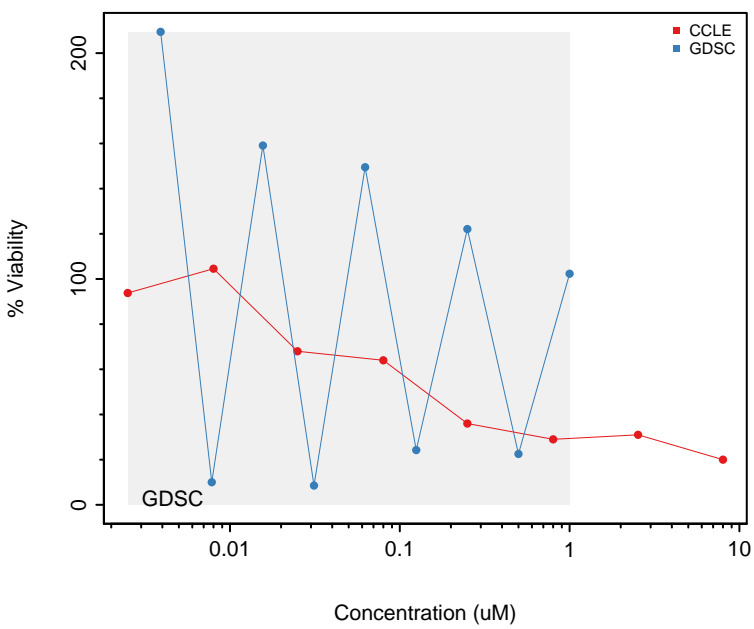

PLX4720:HCC70

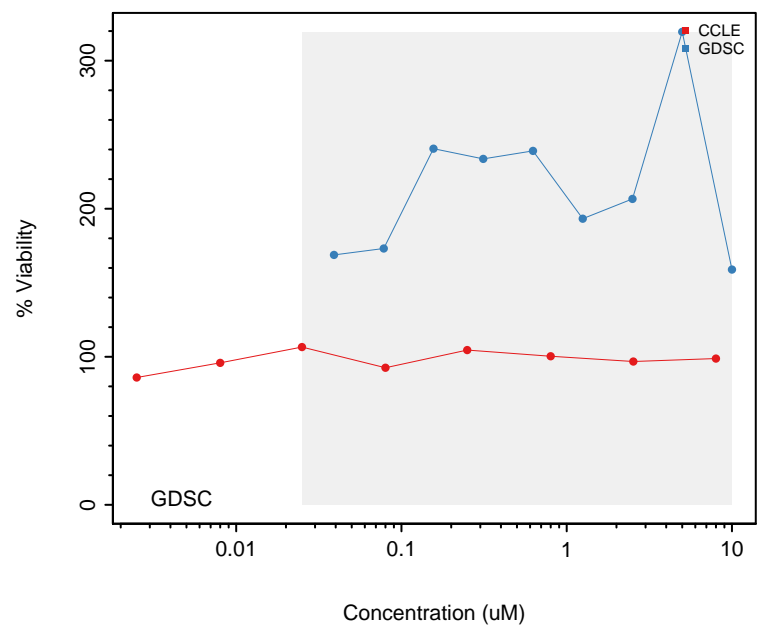

Nutlin-3:HCC70

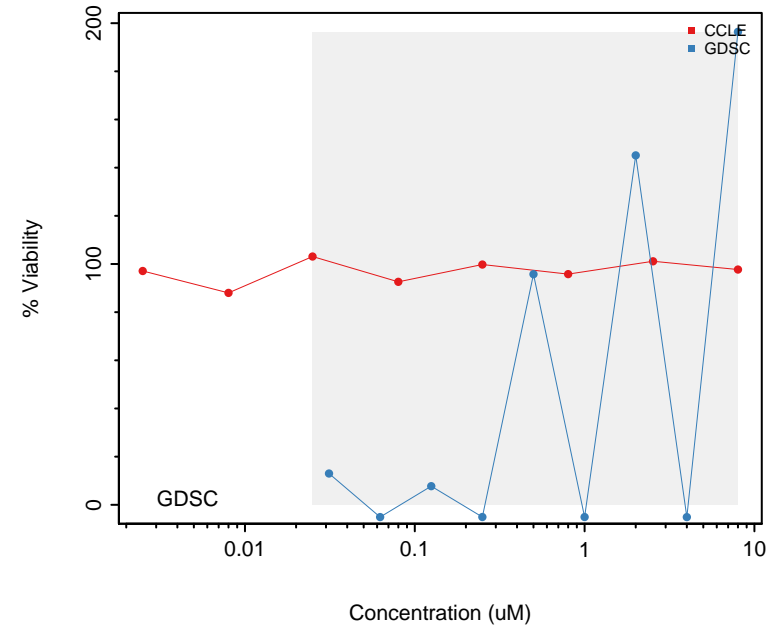

PD-0332991:HCC70

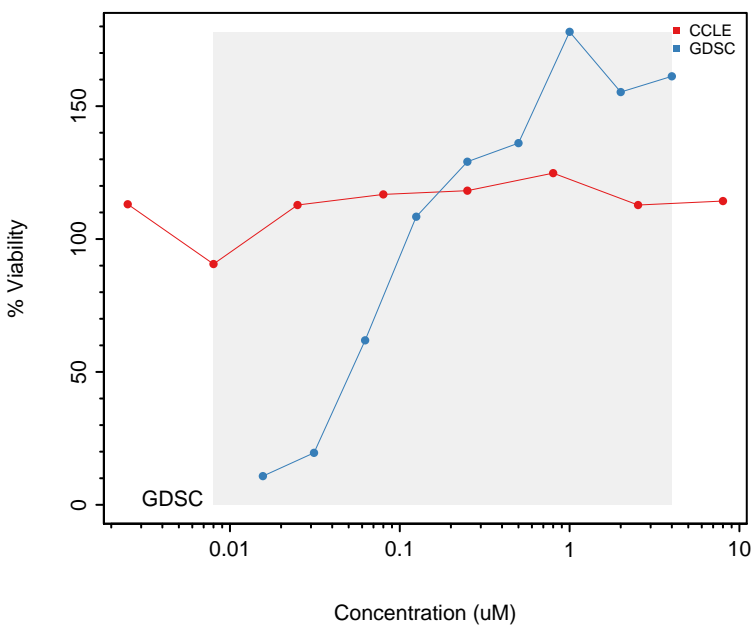

PD-0325901:HCC70

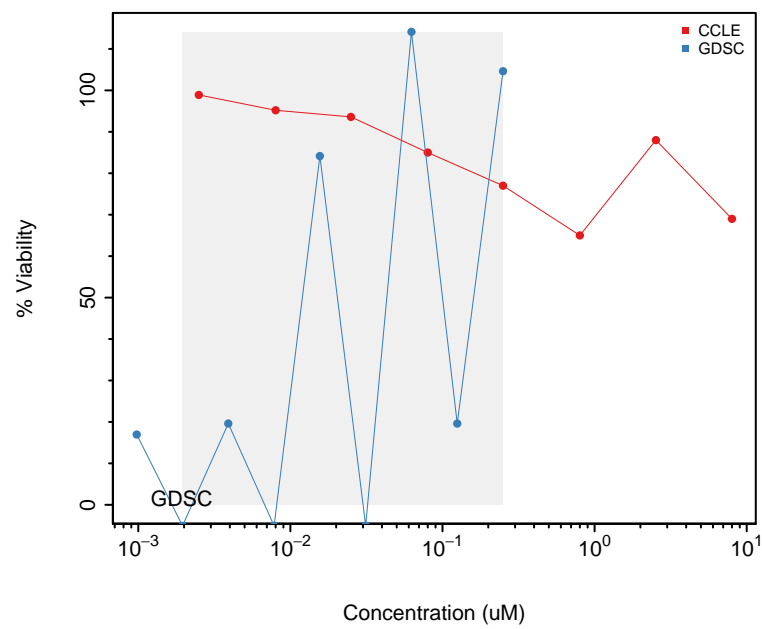

AZD6244:HCC70

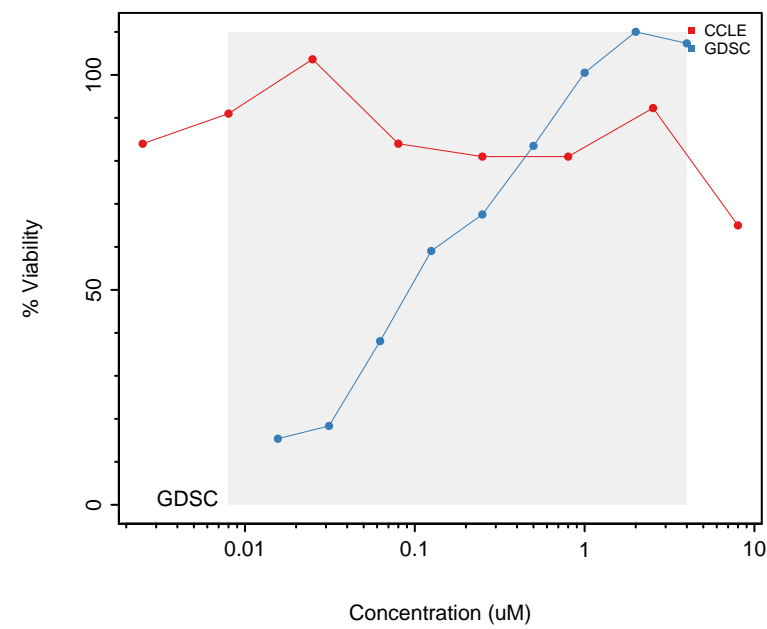

PD-0332991:HEC-1

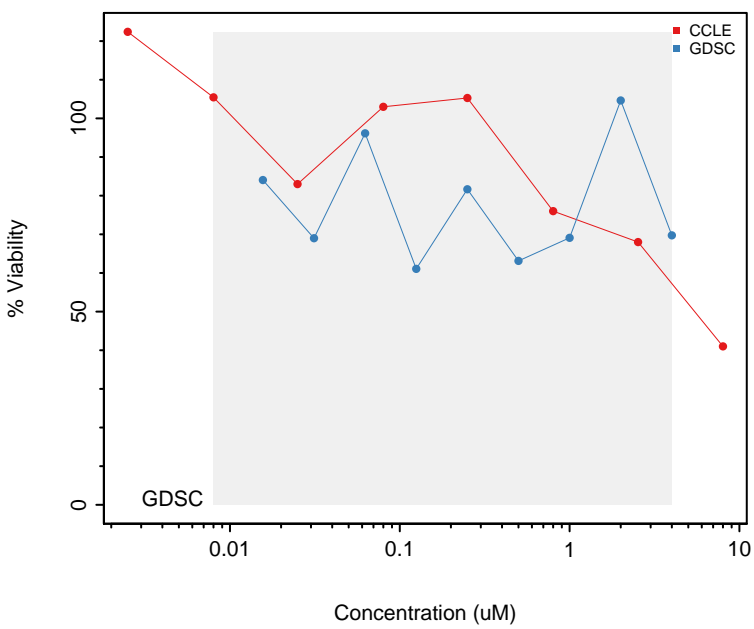

AZD6244:HEC-1

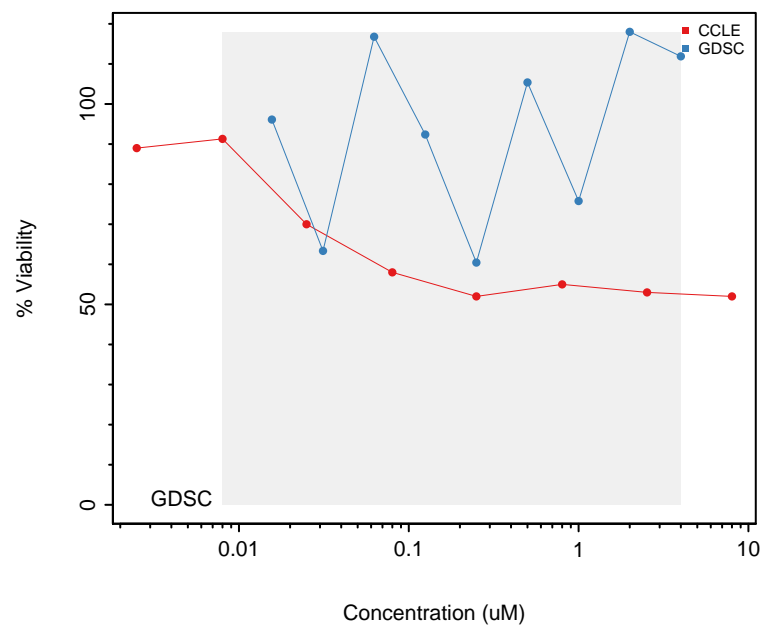

Nilotinib:HLE

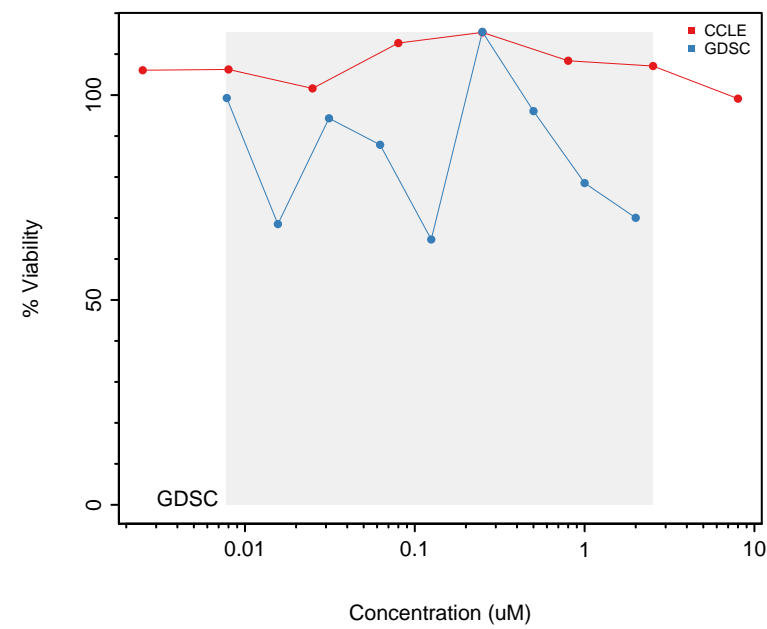



PD-0332991:HLE

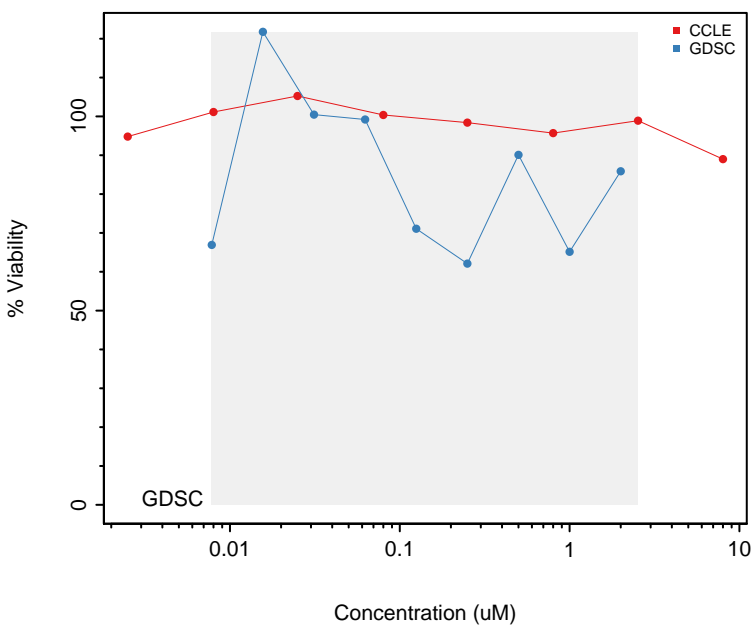

AZD6244:HLE

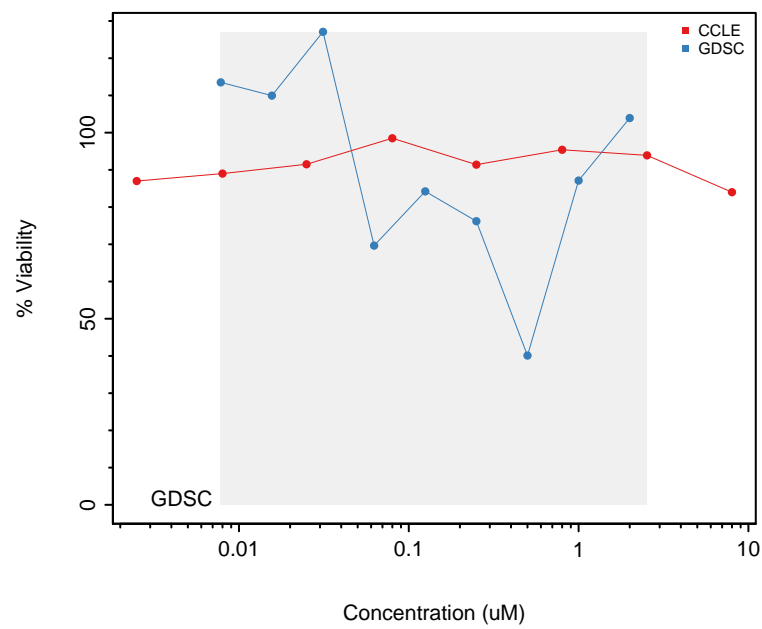

AZD0530:HT-144

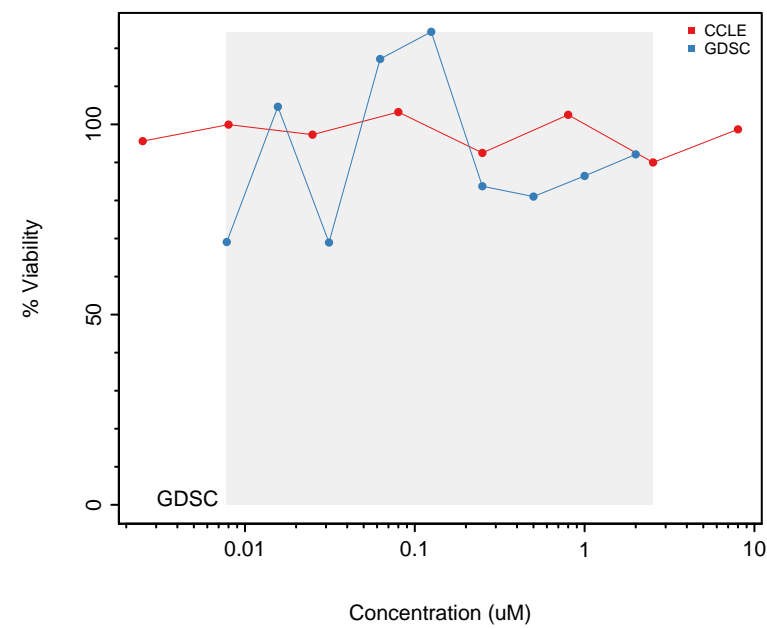

PLX4720:HuCCT1

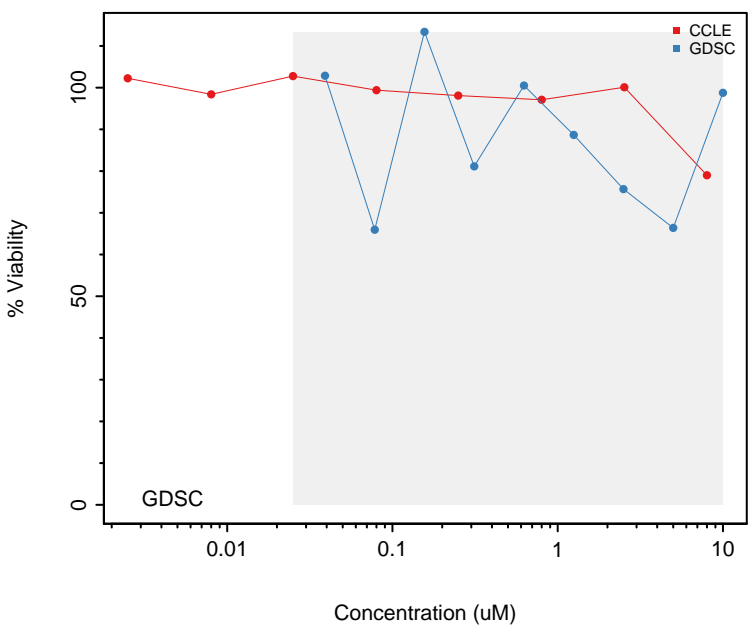

AZD6244:G-402

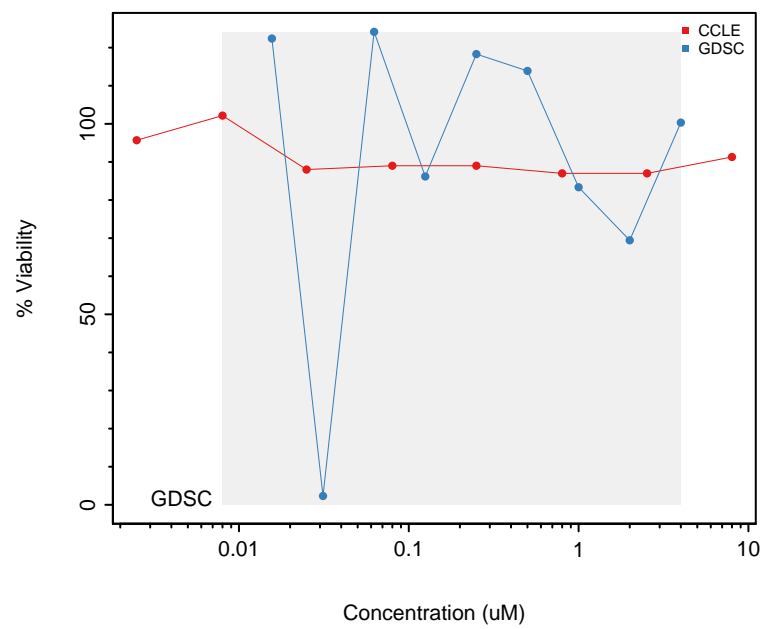

PLX4720:KYSE-180

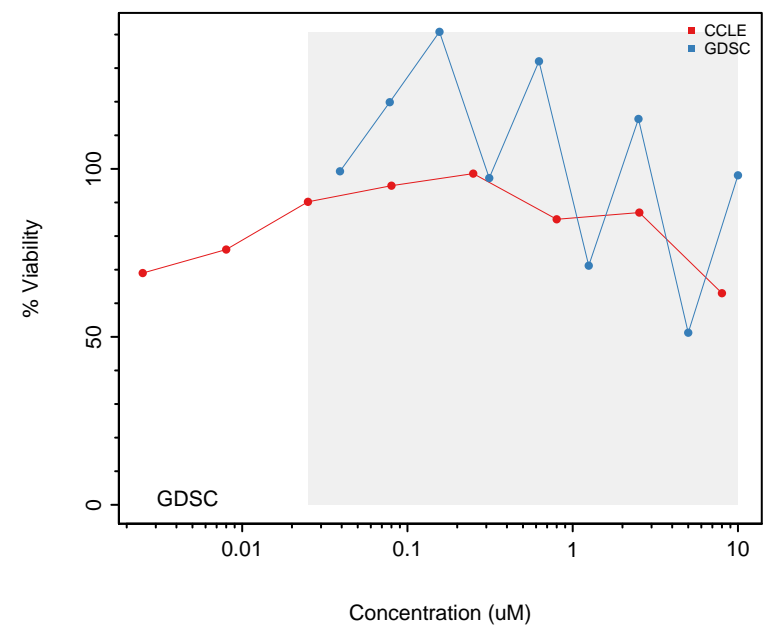

Nutlin-3:KYSE-180

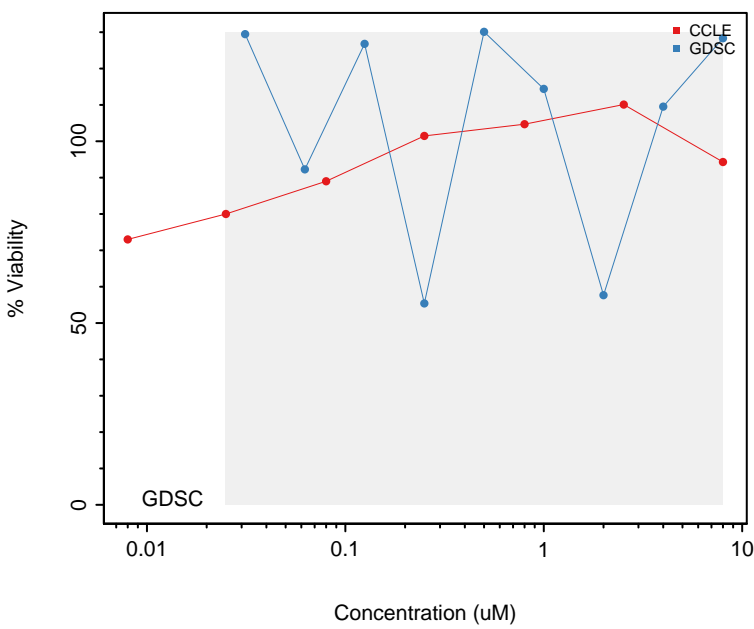

PD-0325901:KYSE-180

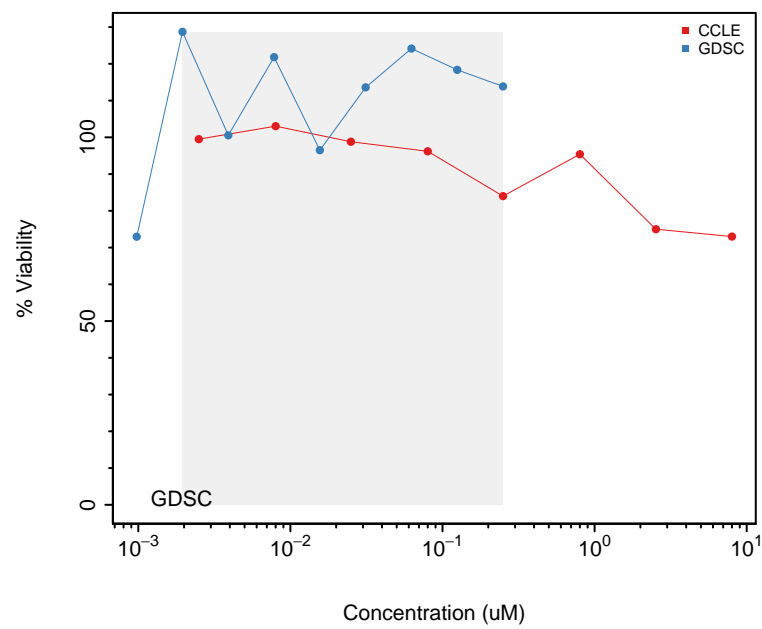

PLX4720:KYSE-510

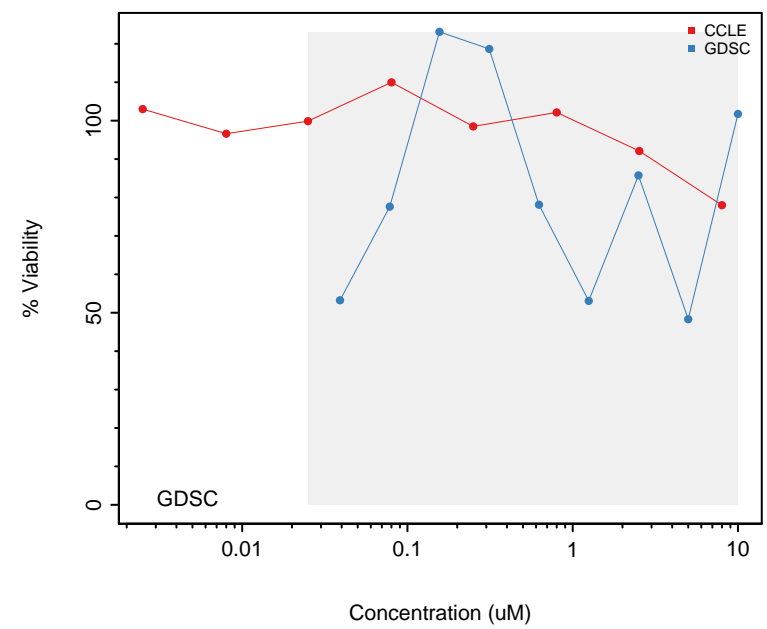

PD-0325901:KYSE-510

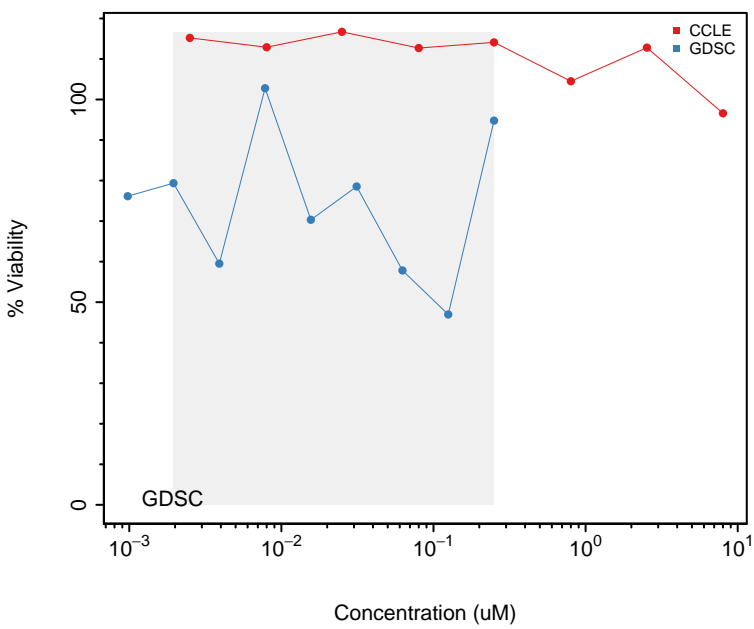

AZD6244:KYSE-510

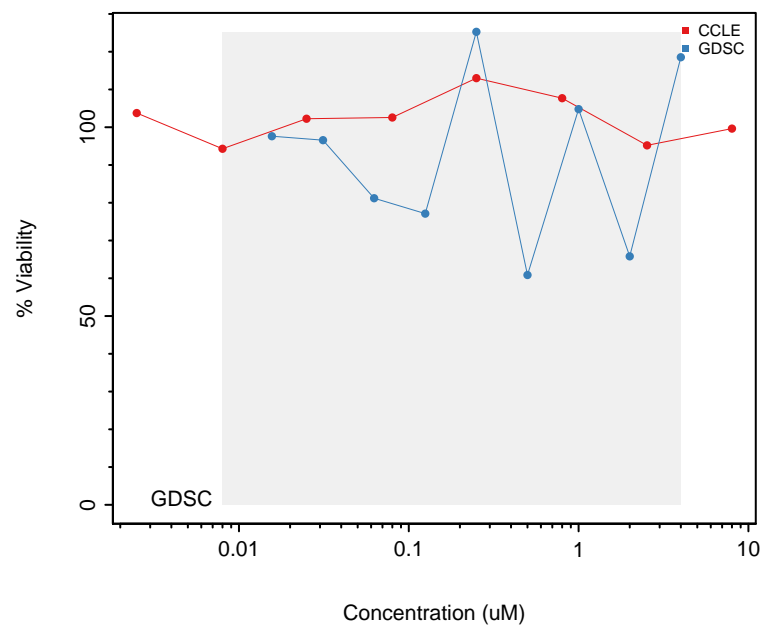

PHA-665752:LS-411N

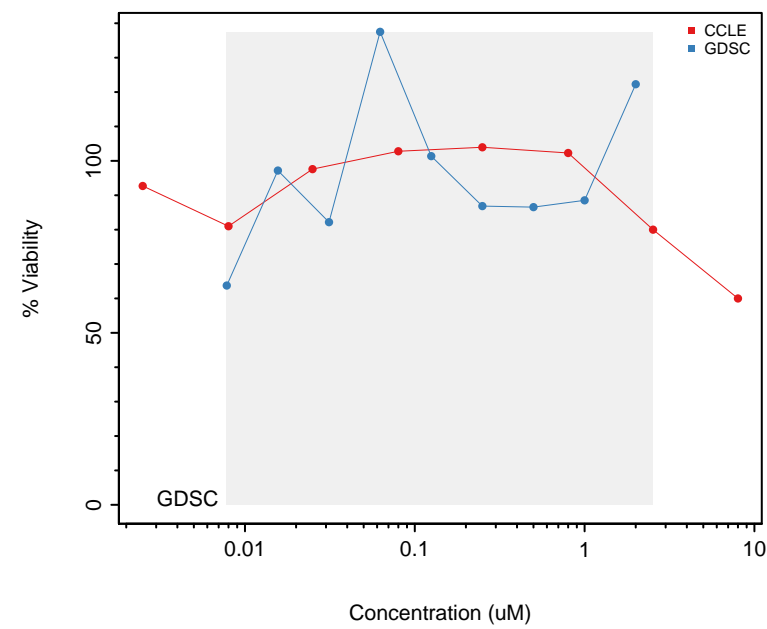

PD-0325901:LU-99A

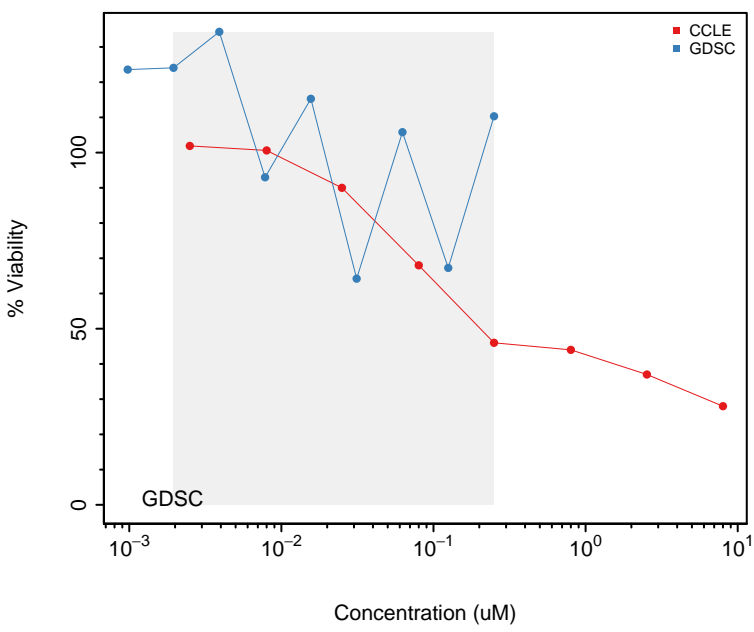

PLX4720:MES-SA

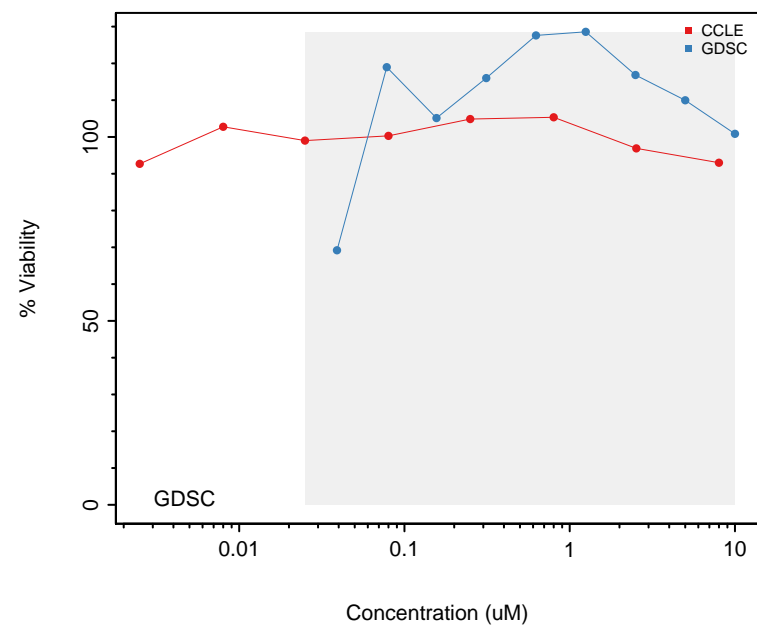

PD-0325901:MES-SA

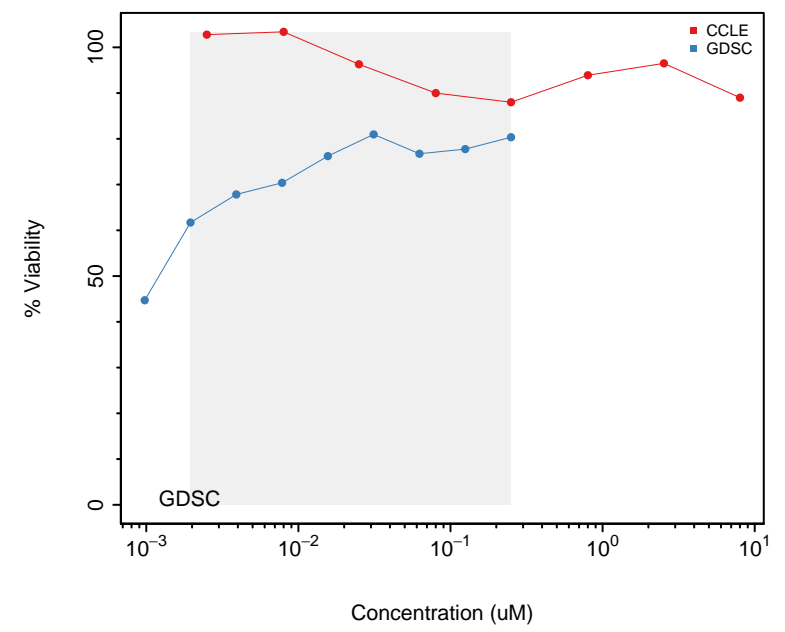

AZD6244:MES-SA

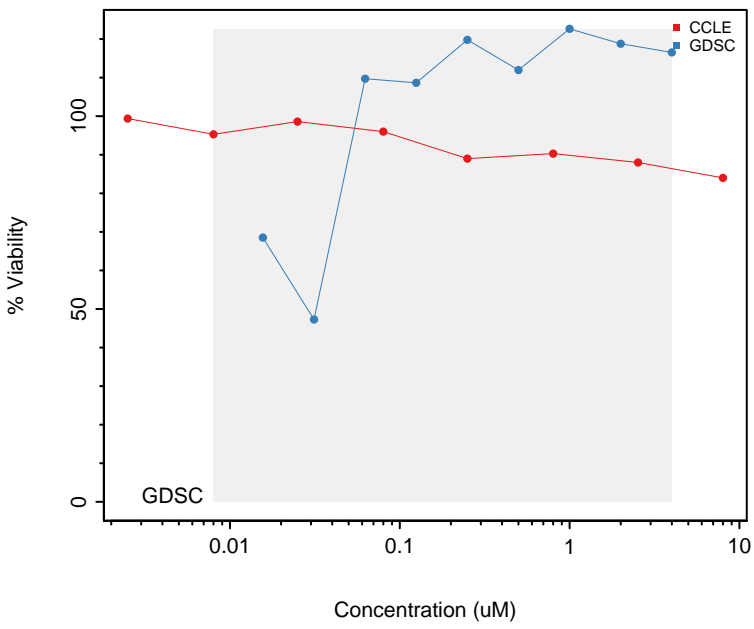

Erlotinib:MPP-89

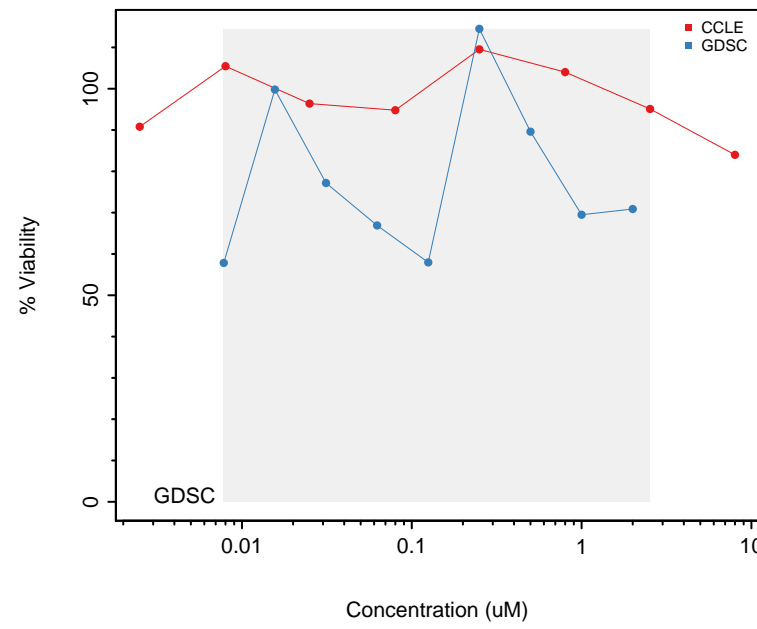

Crizotinib:MPP-89

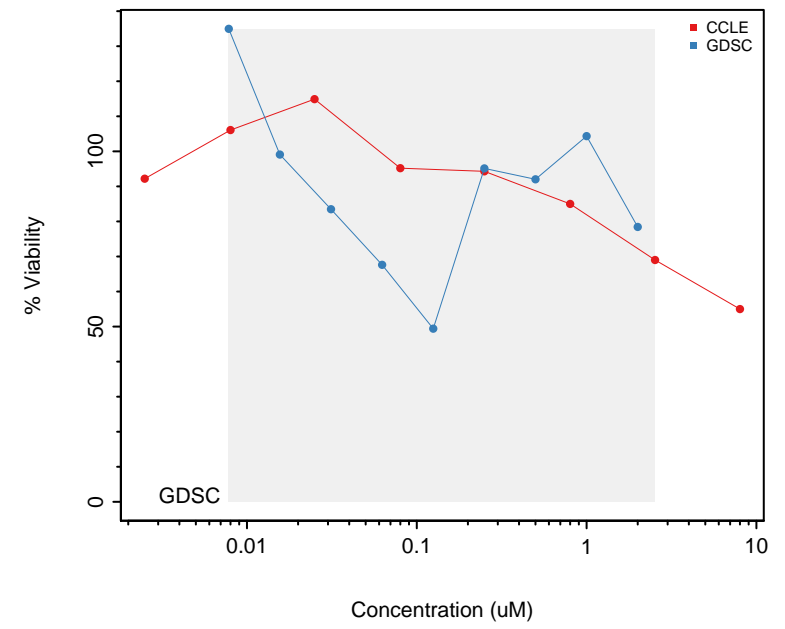

Nutlin-3:NCI-H1793

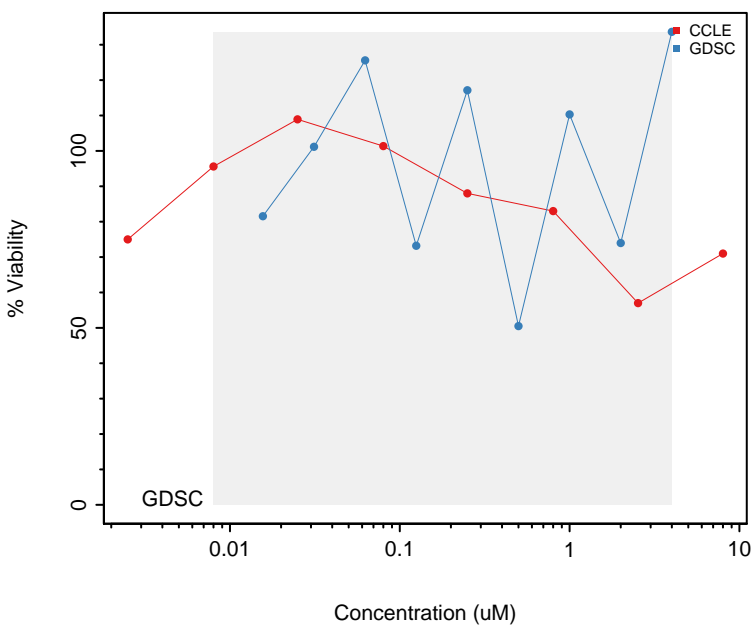

PD-0332991:NCI-H1793

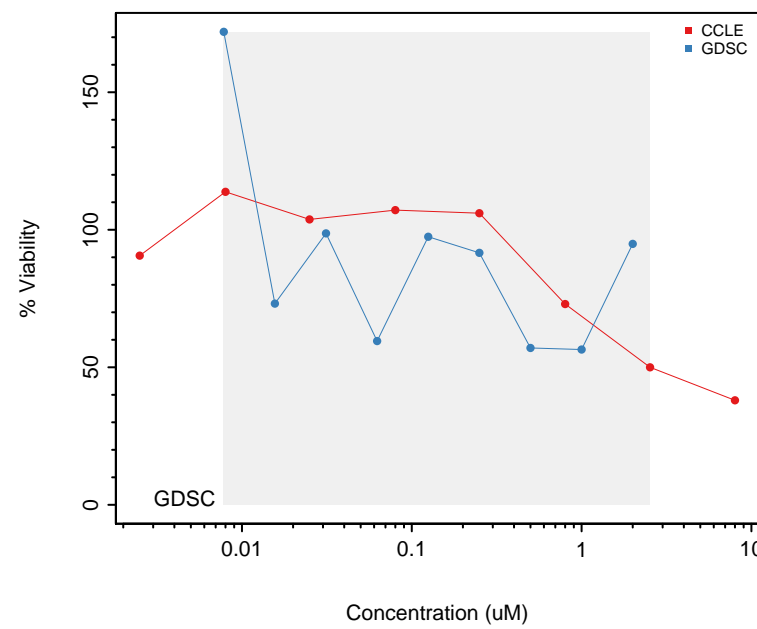

Nutlin-3:NCI-H1581

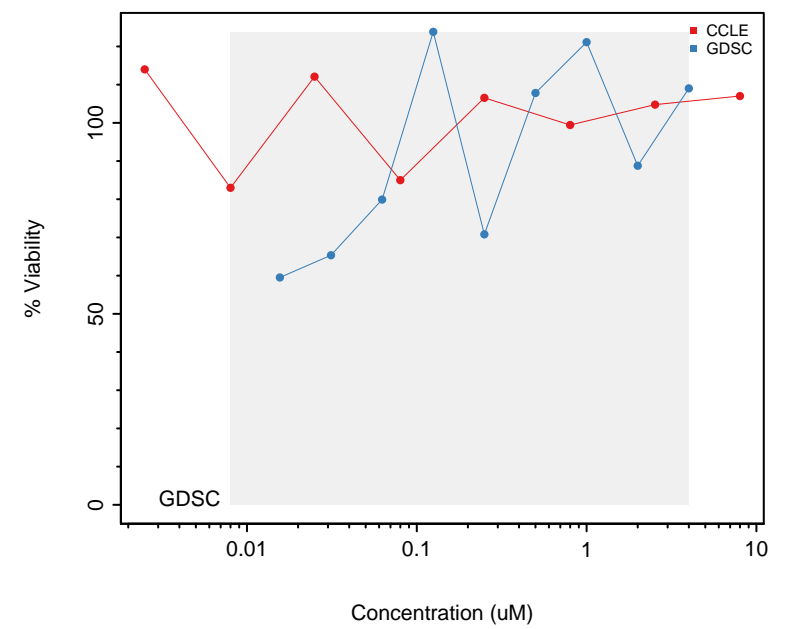

PD-0325901:NCI-H1581

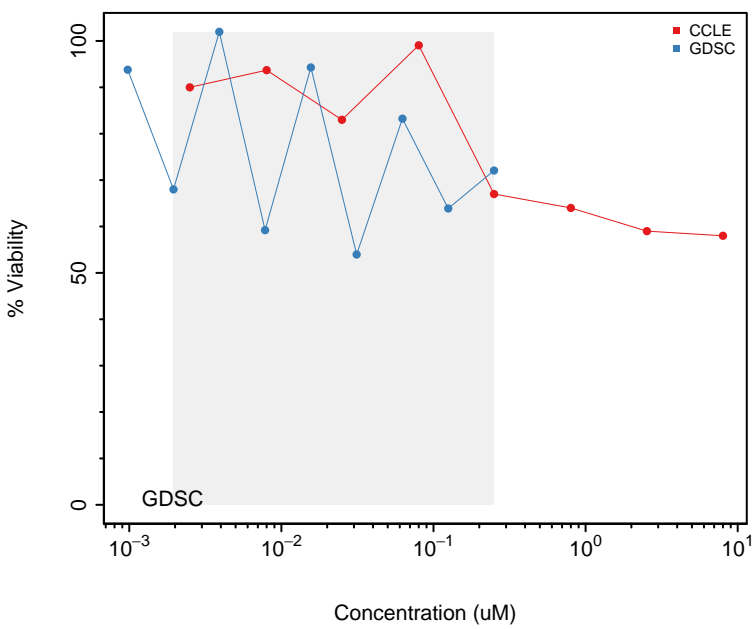

PD-0325901:NCI-H1573

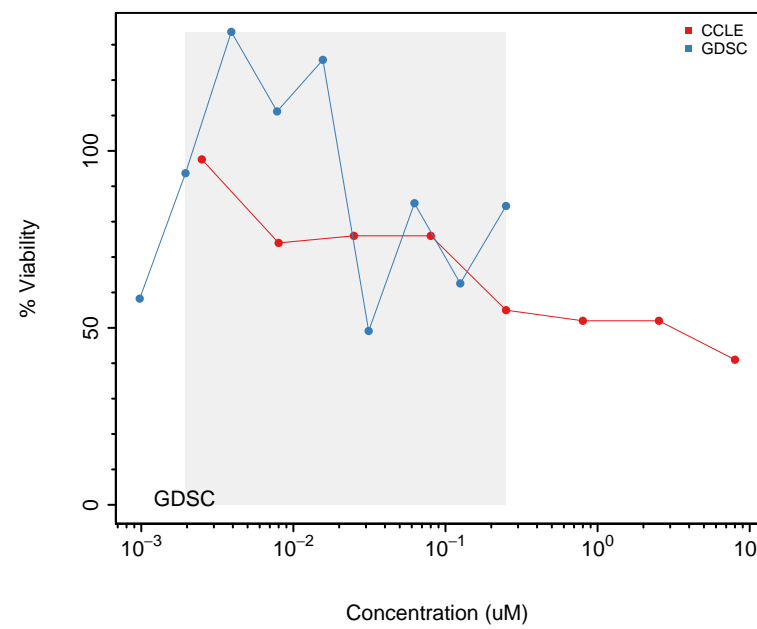

Nutlin-3:RD

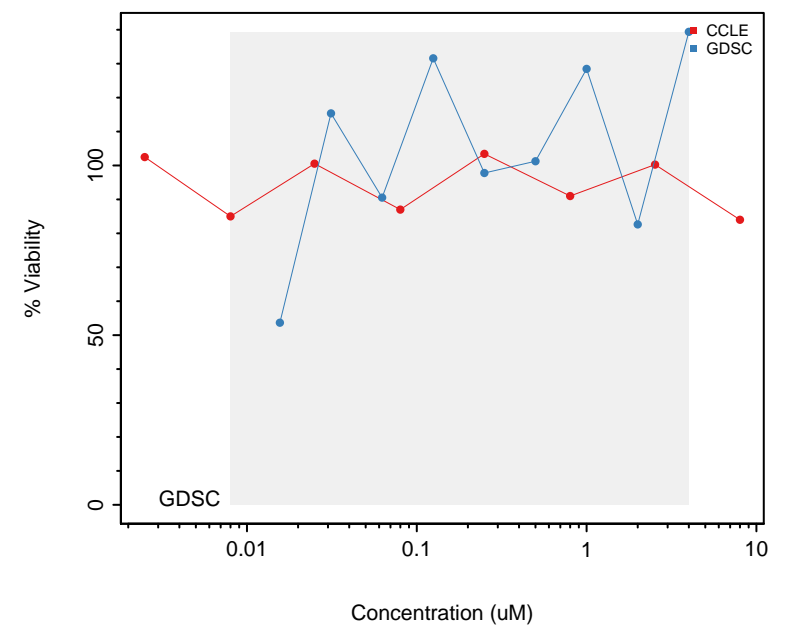

PD-0325901:RD

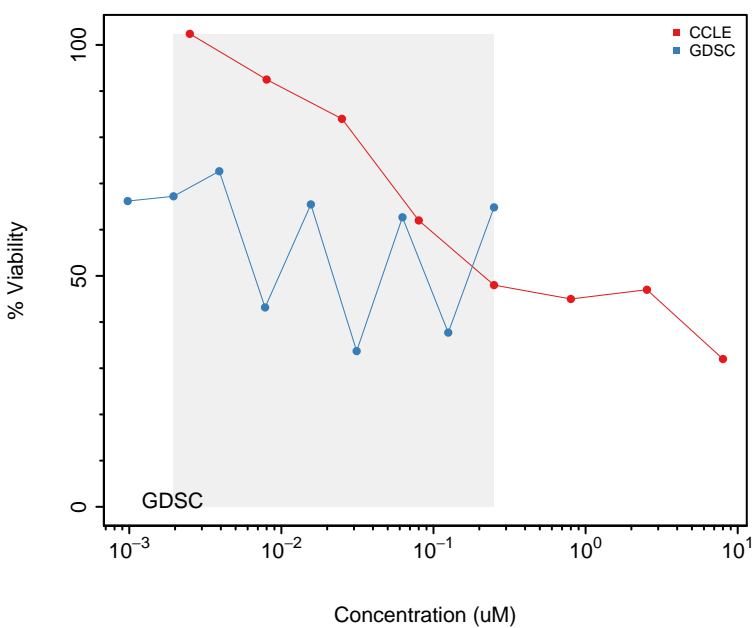

AZD6244:RD

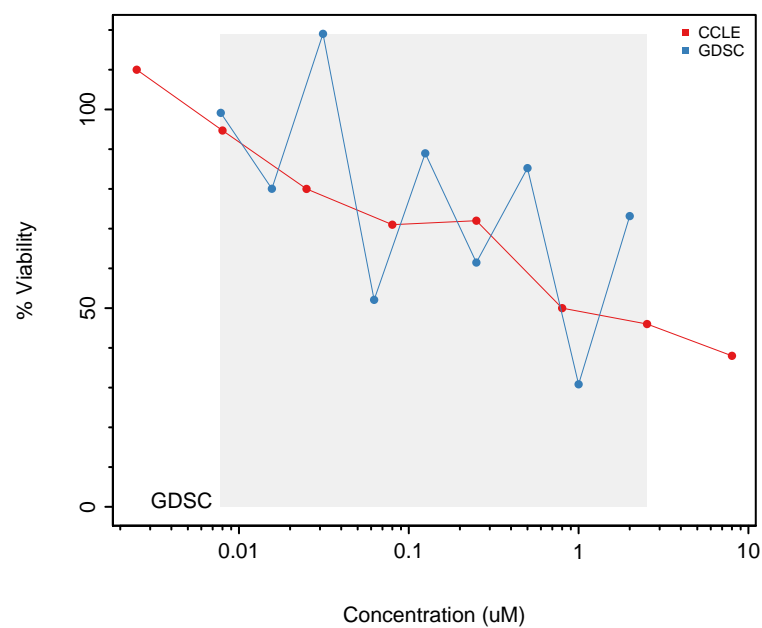

Erlotinib:RKO

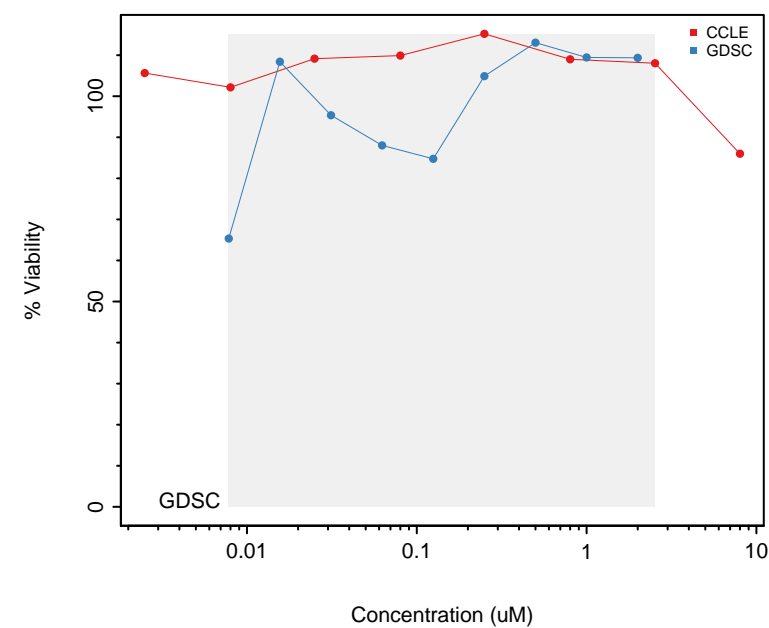

Sorafenib:SF126

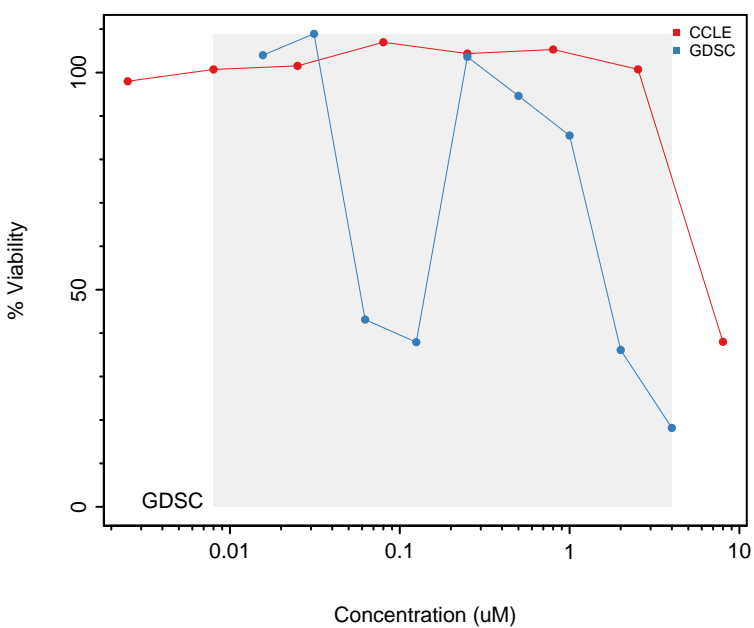

PD-0332991:SK-CO-1

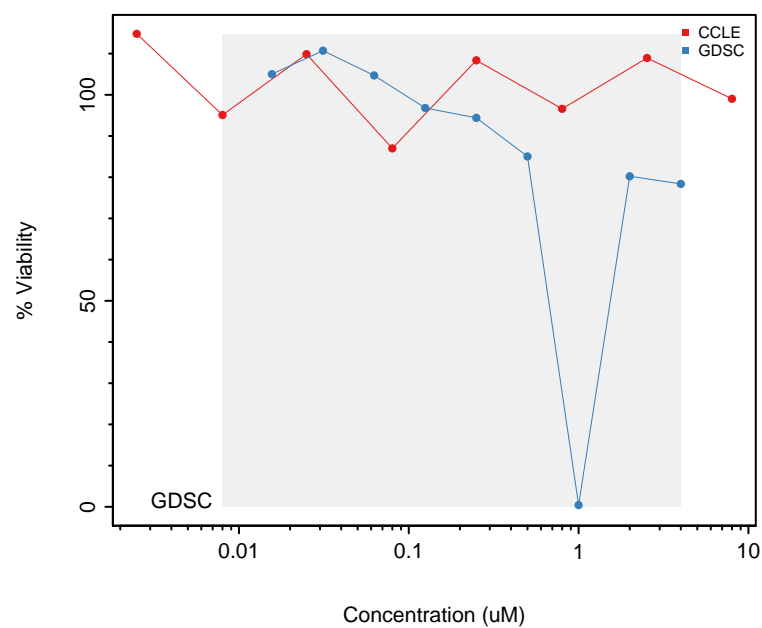

AZD6244:SK-LMS-1

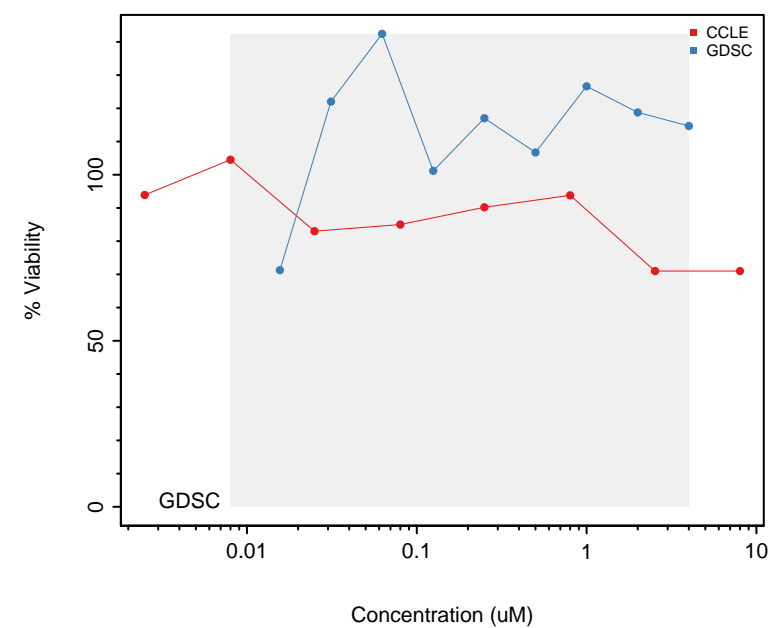

Nutlin-3:SK-LU-1

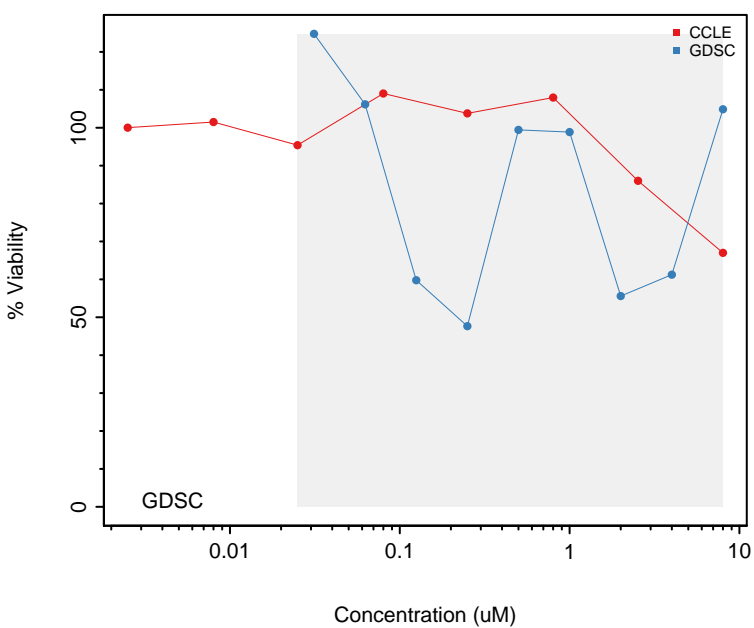

Nutlin-3:SW1088

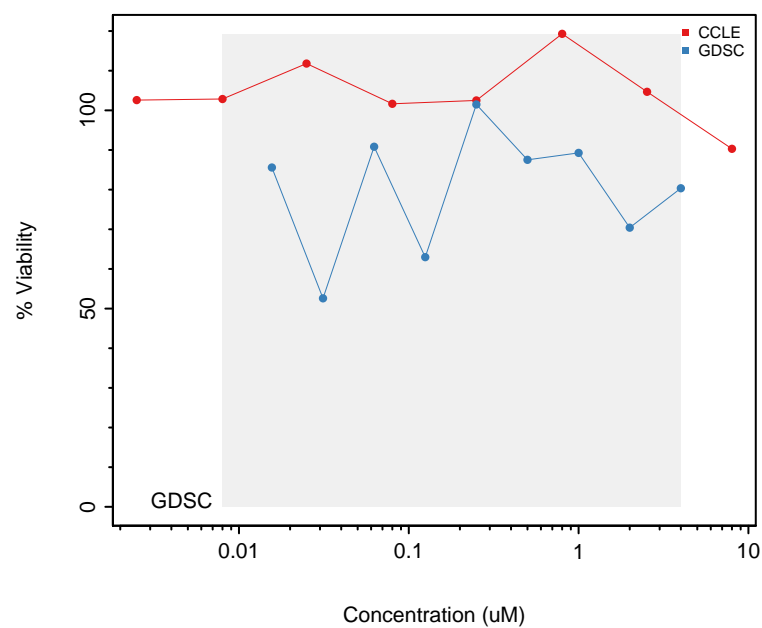

Nilotinib:U-2-OS

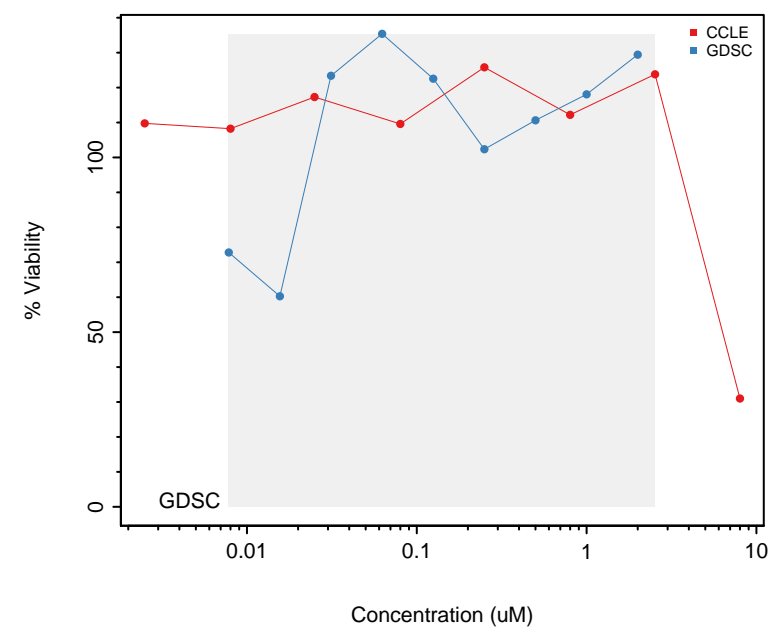

Nilotinib:VMRC-RCZ

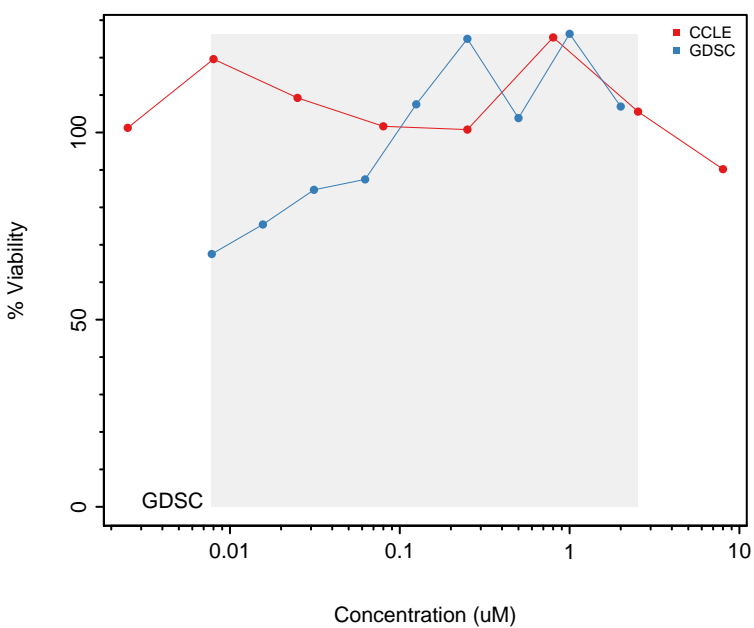

Nutlin-3:VMRC-RCZ

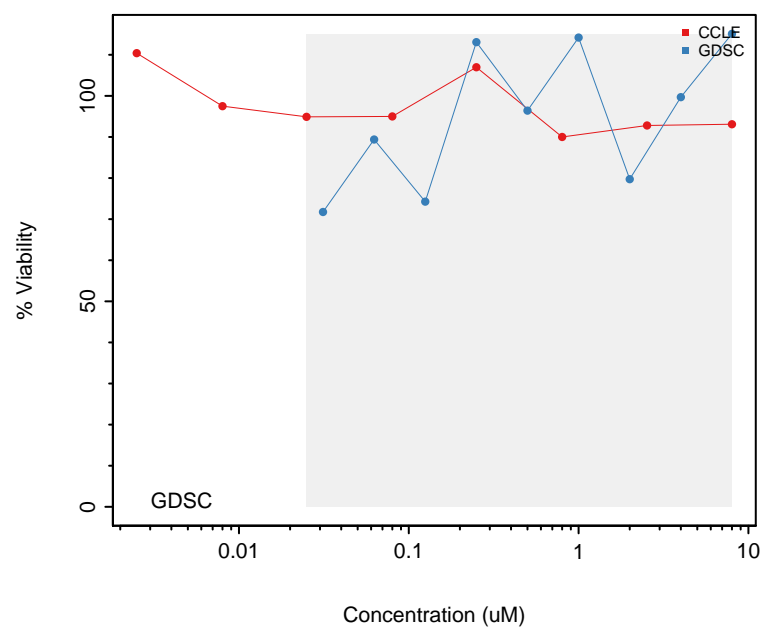

Nilotinib:COLO-678

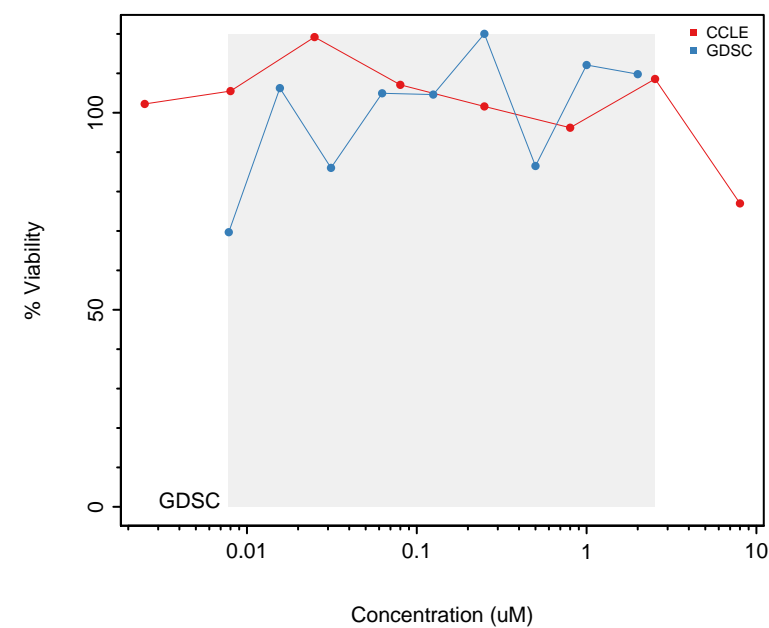

Nilotinib:AsPC-1

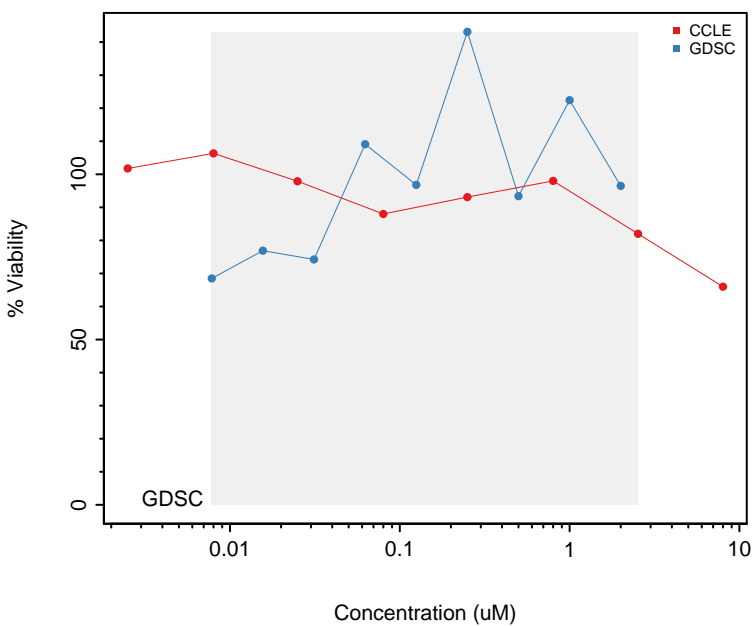

Nilotinib:AN3-CA

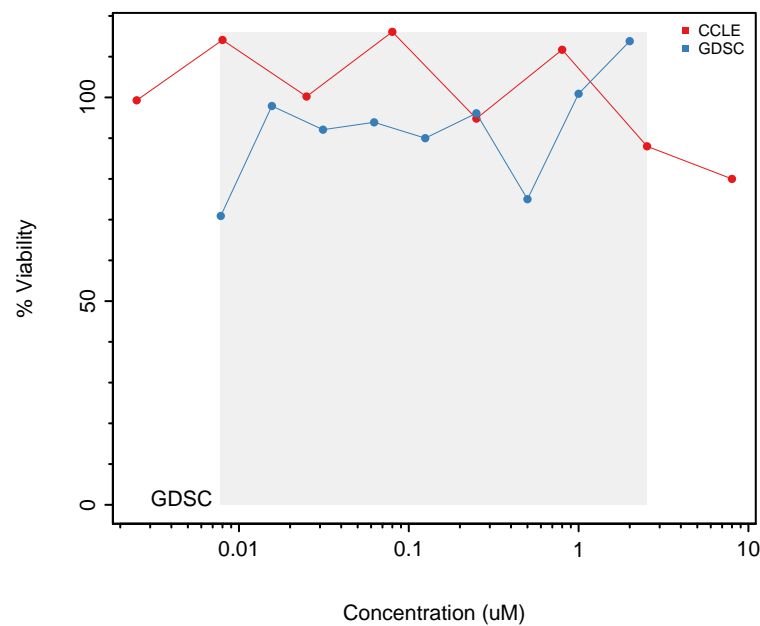

PLX4720:AN3-CA

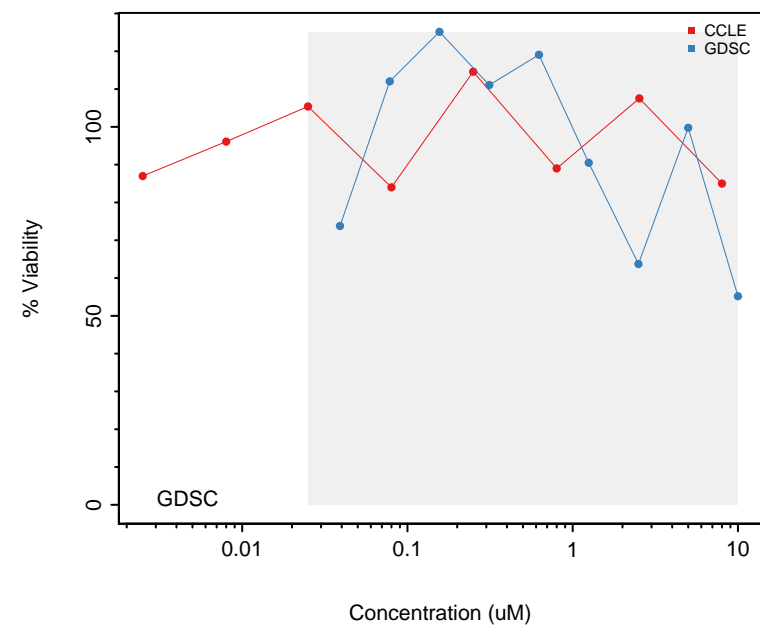

Nutlin-3:AN3-CA

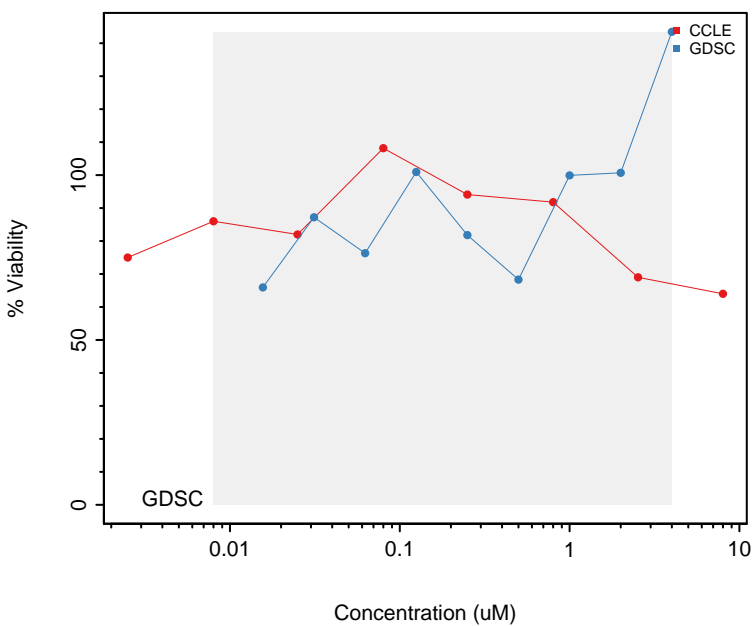

PD-0332991:AN3-CA

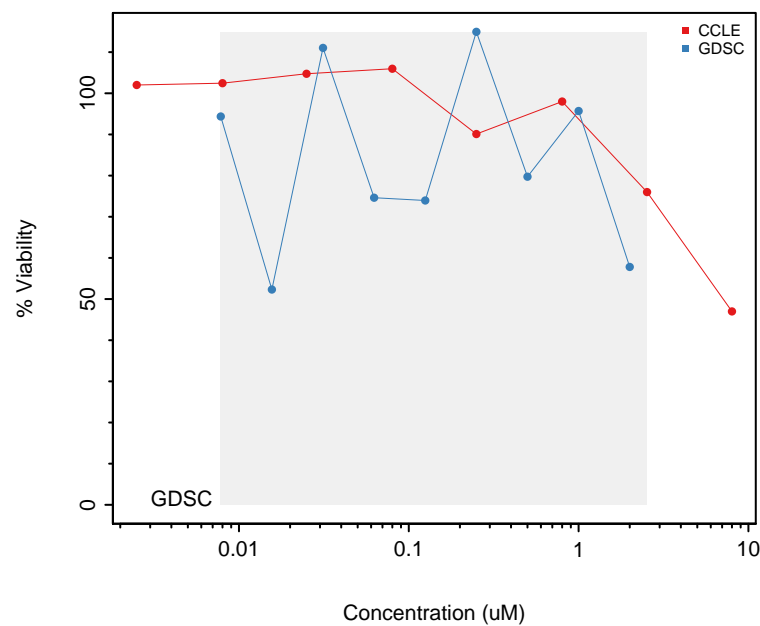

PD-0325901:AN3-CA

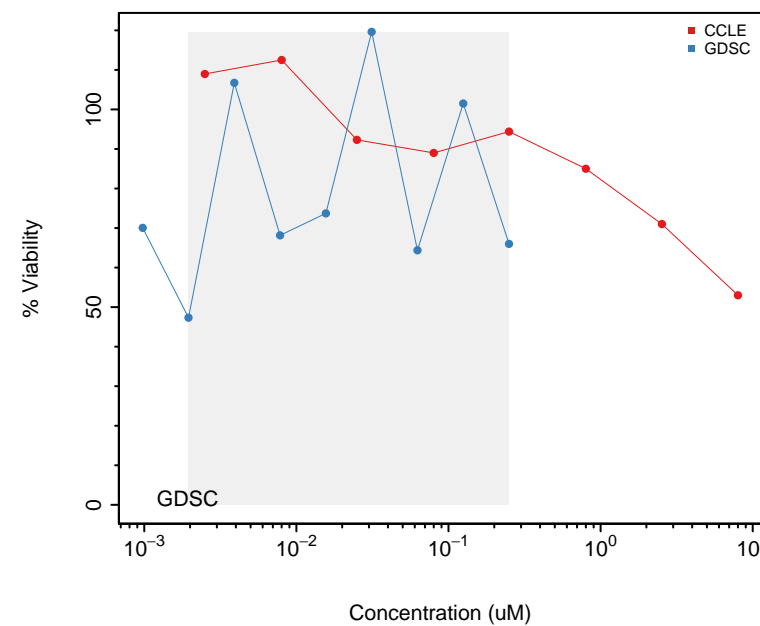

PD-0325901:C3A

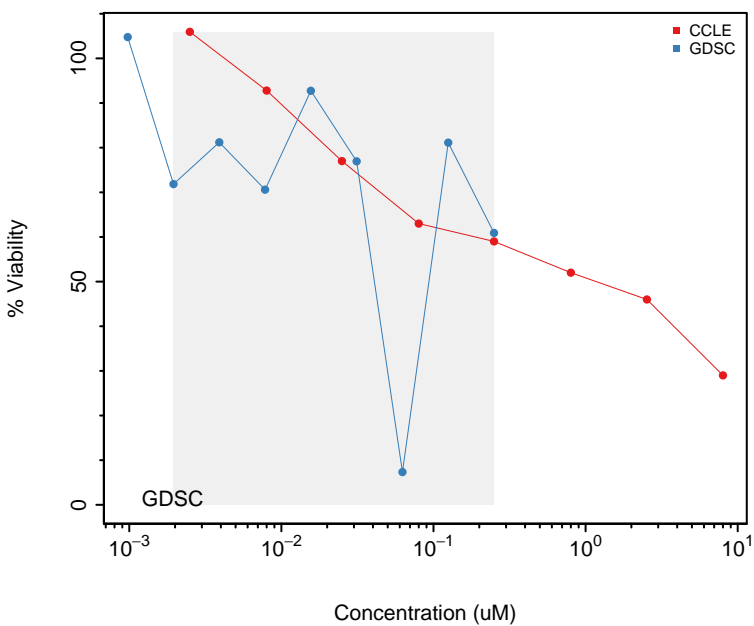

PD-0332991:769-P

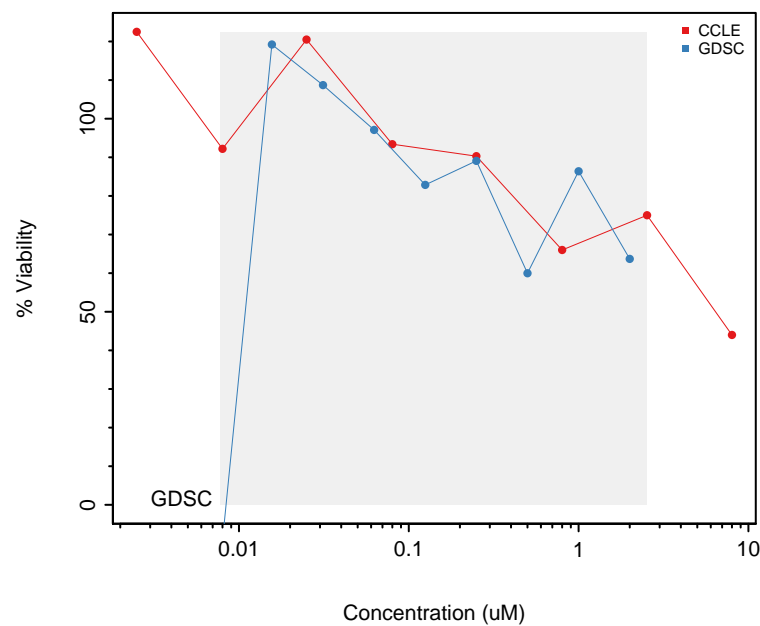

AZD6244:769-P

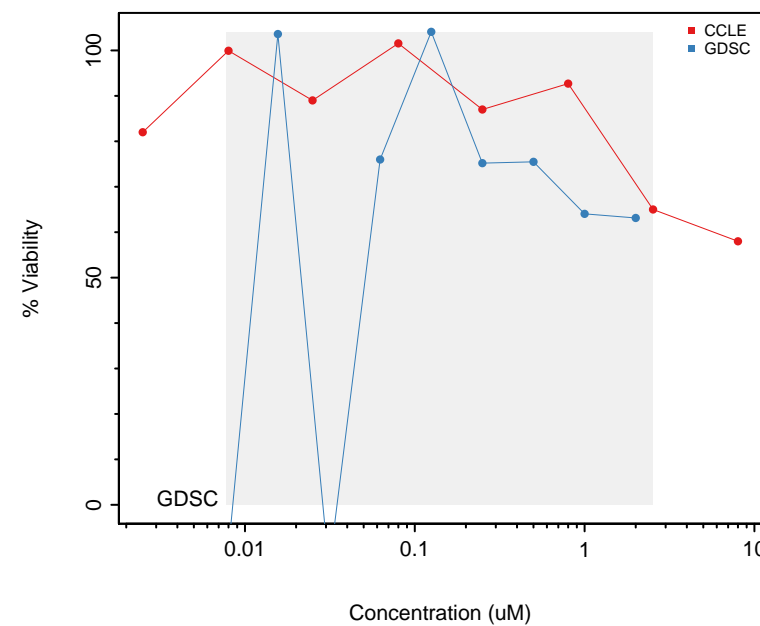

Erlotinib:CAS-1

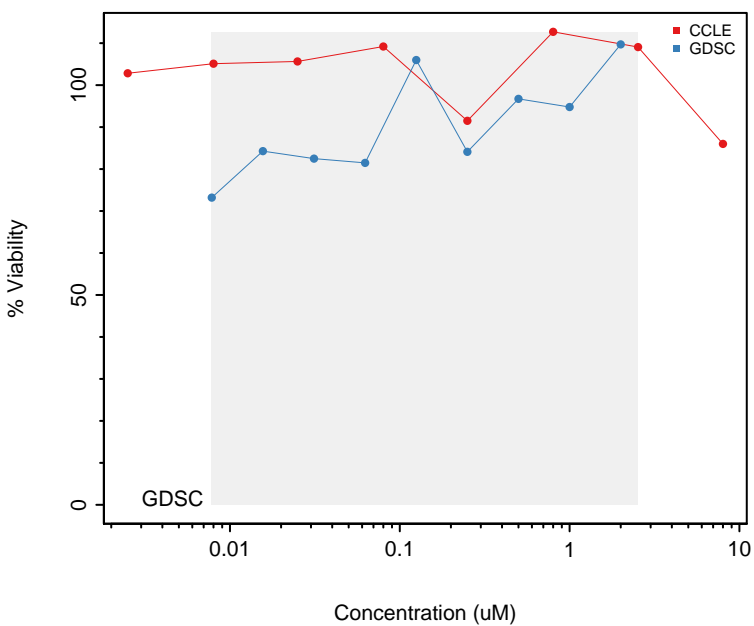

AZD6244:OCI-AML2

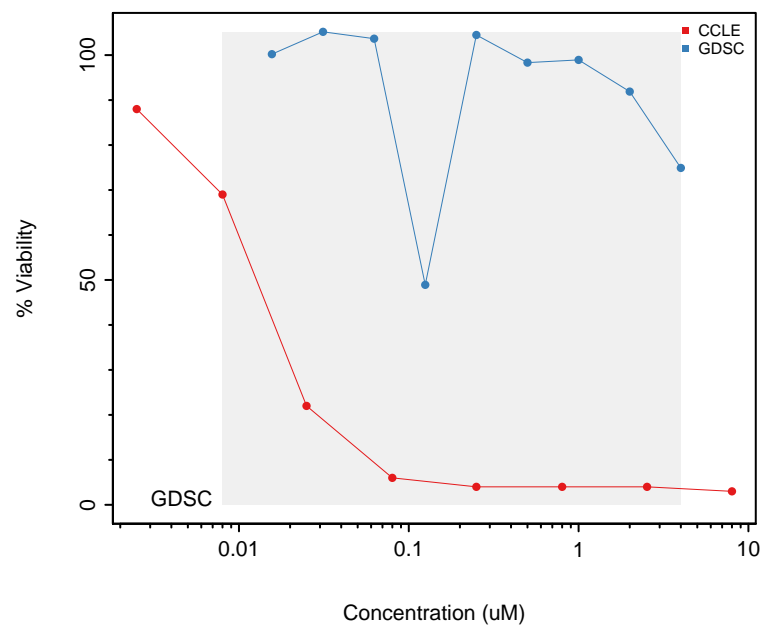

Nilotinib:MKN7

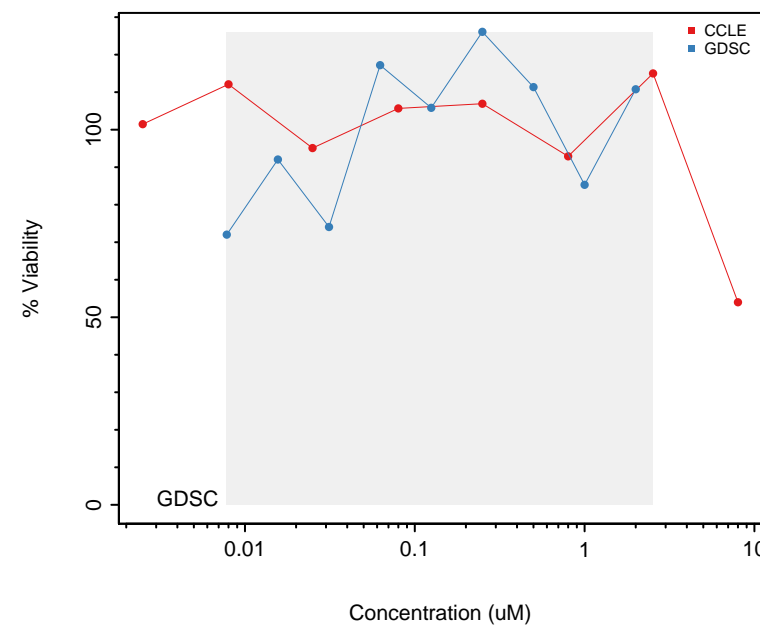

**Nilotinib:MDA-MB-157**

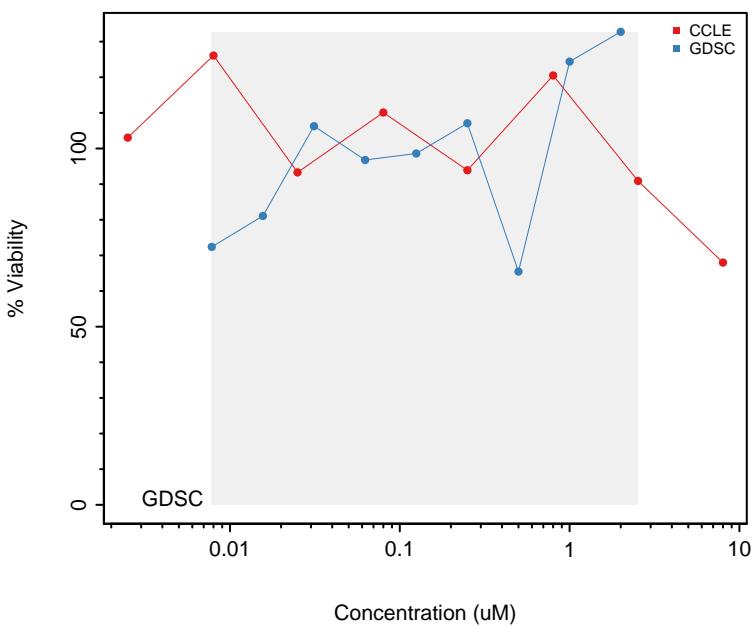

**Nutlin-3:MDA-MB-157**

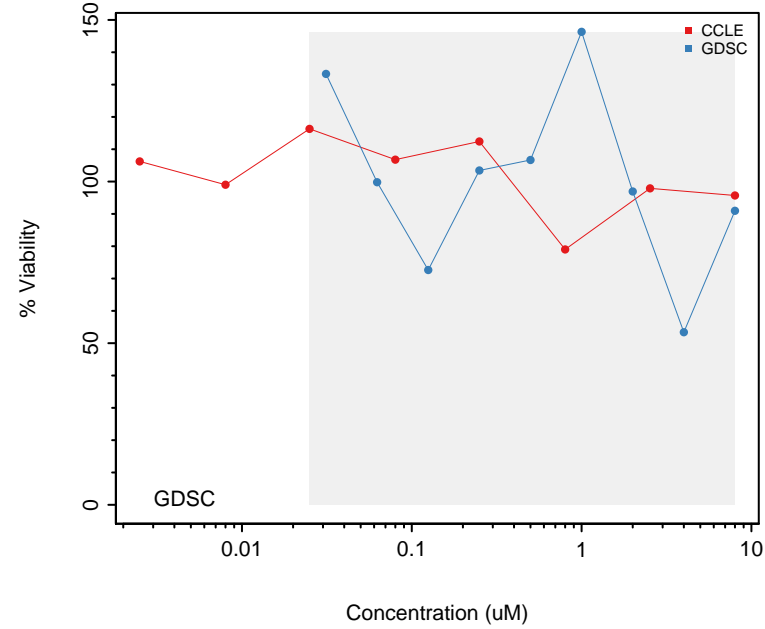

**AZD6244:MDA-MB-157**

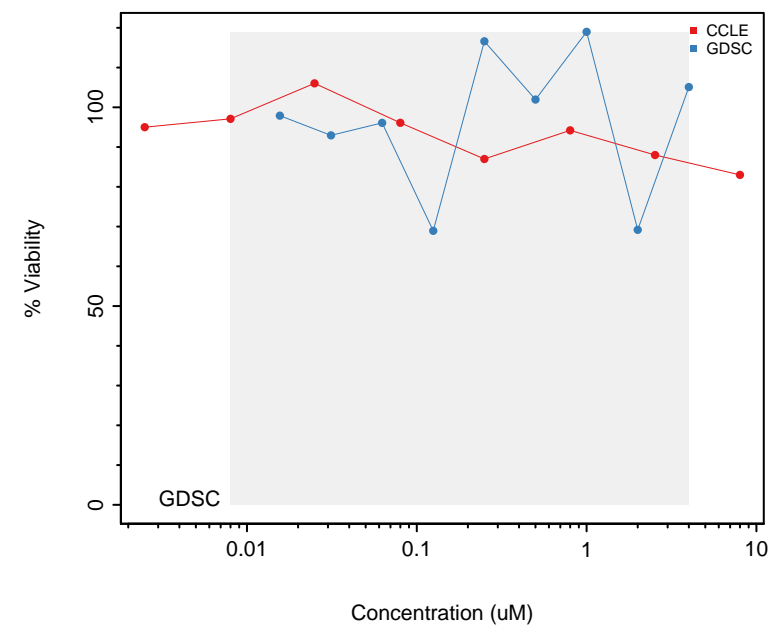

**PD-0332991:Panc 10.05**

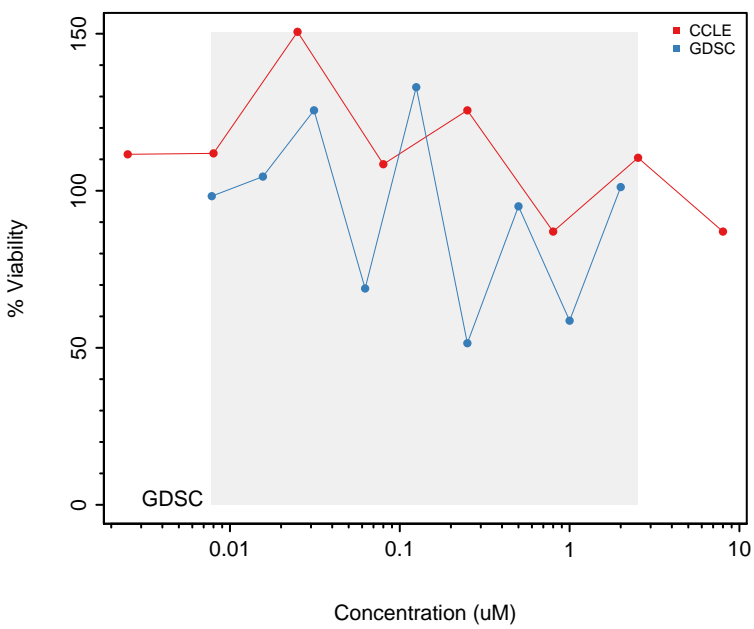

**AZD6244:TE-9**

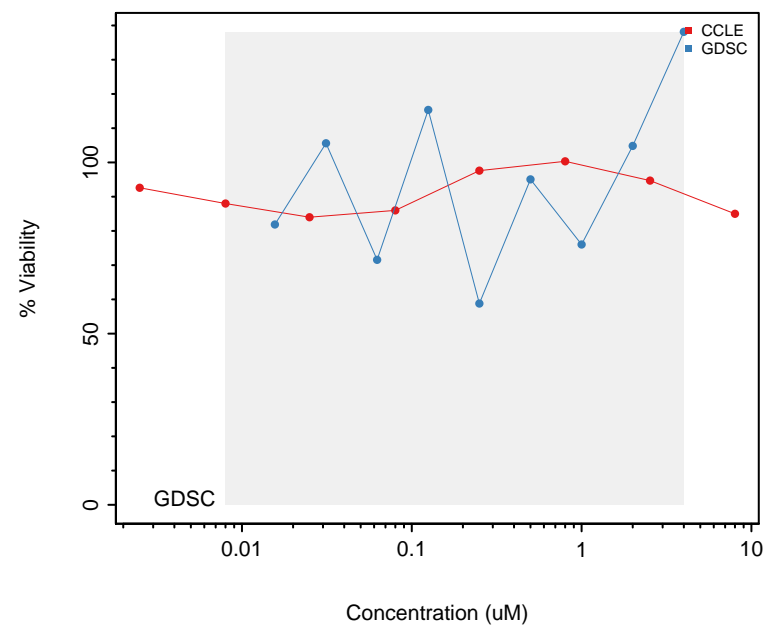

**Nutlin-3:BT-474**

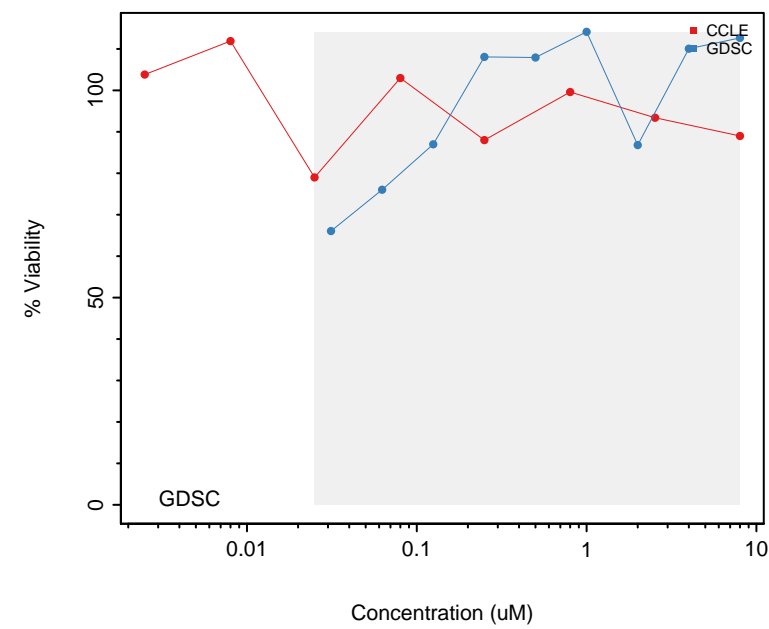

Supplement: Supplementary file [file 026153-2.pdf]
